# Supplementary material for: Preparation of a borane-appended Co(iii) hydride: evidence for metal–ligand cooperativity in O–H bond activation
Source: Royal Society of Chemistry journal article supplement (doi:10.1039/d1dt02331d), 2021-01-01
Supplement: d1dt02331d1.pdf [file d1dt02331d1.pdf]

Supporting information for:

---

***Preparation of a Borane-Appended Co(III) Hydride: Evidence for Metal-Ligand Cooperativity in O–H Bond Activation***

Joseph A. Zurakowski,<sup>a,¶</sup> Brady J. H. Austen,<sup>a,¶</sup> Maeve, C. Dufour,<sup>a</sup> Moulika Bhattacharyya,<sup>a</sup>

Denis M. Spasyuk,<sup>b</sup> and Marcus W. Drover<sup>a,\*</sup>

---

\*E-mail: [marcus.drover@uwindsor.ca](mailto:marcus.drover@uwindsor.ca)

<sup>a</sup>Department of Chemistry and Biochemistry, The University of Windsor, 401 Sunset Avenue, Windsor, ON, N9B 3P4, Canada

<sup>b</sup> Canadian Light Source Inc., 44 Innovation Blvd., Saskatoon, SK, S7N 2V3, Canada

<sup>¶</sup>These authors contributed equally

|                             |            |
|-----------------------------|------------|
| 1. Experimental Section     | <b>S2</b>  |
| 2. Preparation of Compounds | <b>S3</b>  |
| 3. Multinuclear NMR data    | <b>S11</b> |
| 4. Crystallography          | <b>S49</b> |
| 5. Computational Chemistry  | <b>S52</b> |

## **Experimental Section:**

**General Considerations.** All experiments were carried out employing standard Schlenk techniques under an atmosphere of dry nitrogen employing degassed, dried solvents in a solvent purification system supplied by PPT, LLC. Non-halogenated solvents were tested with a standard purple solution of sodium benzophenone ketyl in tetrahydrofuran in order to confirm effective moisture removal. *d*<sub>6</sub>-benzene was dried over molecular sieves and degassed by three freeze-pump-thaw cycles. HBCy<sub>2</sub><sup>1</sup> and BCy<sub>2</sub><sup>n</sup>Oct<sup>2</sup> were prepared using literature procedures. All other reagents were purchased from commercial vendors and used without further purification unless otherwise stated.

**Physical methods.** <sup>1</sup>H NMR spectra are reported in parts per million (ppm) and are referenced to residual solvent e.g., <sup>1</sup>H(C<sub>6</sub>D<sub>6</sub>): δ 7.16; <sup>13</sup>C(C<sub>6</sub>D<sub>6</sub>): 128.06; coupling constants are reported in Hz. <sup>13</sup>C, <sup>11</sup>B, and <sup>31</sup>P NMR spectra were performed as proton-decoupled experiments and are reported in ppm.

**Electrochemistry.** Electrochemical measurements were carried out using a BioLogic SP50: Single Channel Electrochemical Potentiostat. A freshly polished glassy carbon electrode was used as the working electrode, a platinum wire was used as the counter electrode, and a Ag wire/AgOTf solution (with electrolyte) was used as the reference electrode. All analytes (~2 mM) were measured in 4 mL THF in an N<sub>2</sub>-filled glovebox containing electrolyte (0.25 M [<sup>n</sup>Bu<sub>4</sub>N]PF<sub>6</sub>). All reported potentials are referenced to the ferrocene/ferrocenium couple, [Cp<sub>2</sub>Fe]<sup>+</sup>/Cp<sub>2</sub>Fe, which was measured externally and internally to ensure consistency.

---

<sup>1</sup> A. Abiko, *Org. Synth.* 2002, **79**, 103.

<sup>2</sup> M.W. Drover, L.L. Schafer, J.A. Love. *Angew Chem., Int. Ed.* 2016, **51**, 3181.

## Preparation of Compounds:

**[Cp\*Co<sup>III</sup>(tape)Cl]Cl** ([1]Cl; C<sub>24</sub>H<sub>39</sub>Cl<sub>2</sub>P<sub>2</sub>Co, M<sub>w</sub> = 519 g/mol): In the glovebox, [Cp\*Co(μ-Cl)]<sub>2</sub> (20 mg, 0.09 mmol, 0.5 equiv.) and tape (22 mg, 0.09 mmol, 1 equiv.) were combined in a 20 mL scintillation vial equipped with a stir bar. Approximately 4 mL of hexanes was added and the solution was allowed to stir for 1 h at room temperature. The resulting solution was orange in color with ample brown precipitate ([1]Cl). The solution was decanted away from the solid and the solid was washed with additional hexanes (3 x 5 mL portions) and dried *in-vacuo* to provide [1]Cl (18 mg, 82%). For the isolation of **2**, solvent from the aforementioned hexane washings was removed *in-vacuo*, providing an orange solid that was once again dissolved in hexanes, filtered, and solvent removed to provide **2** (16 mg, 82 %). <sup>1</sup>H NMR (500 MHz, CDCl<sub>3</sub>, 298 K): δ = 5.94 (m, 2H; CH(allyl)), 5.79 (m, 2H; CH(allyl)), 5.51-5.17 (m (two sets), 8H; CH<sub>2</sub>(allyl)), 3.08 (br, 2H; P-CH<sub>2</sub>(allyl)), 2.89 (br, 6H; P-CH<sub>2</sub>(allyl)), 2.06 (br, 2H; P-CH<sub>2</sub>-CH<sub>2</sub>-P), 1.57 (br, 2H; P-CH<sub>2</sub>-CH<sub>2</sub>-P), 1.45 (s, 15H; Cp\*H). <sup>13</sup>C{<sup>1</sup>H} NMR (125.8 MHz, CDCl<sub>3</sub>, 298 K): δ = 130.4, 129.4, 123.1, 120.9, 98.6, 30.6, 30.4, 22.1, 11.0. <sup>31</sup>P{<sup>1</sup>H} NMR (202.5 MHz, CDCl<sub>3</sub>, 298 K): δ = + 65.3. HRESI(+)-MS: calcd. 483.1548 exptl. 483.1555 for C<sub>24</sub>H<sub>39</sub>ClP<sub>2</sub>Co [M]<sup>+</sup>.

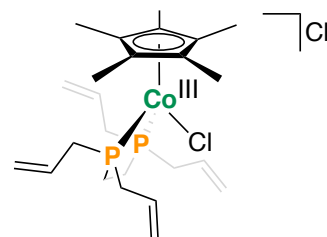

**[Cp\*Co<sup>III</sup>(tape)Cl]B(C<sub>6</sub>F<sub>5</sub>)<sub>4</sub>** ([1]B(C<sub>6</sub>F<sub>5</sub>)<sub>4</sub>; C<sub>48</sub>H<sub>39</sub>BClF<sub>20</sub>P<sub>2</sub>Co, M<sub>w</sub> = 1163 g/mol): In the glovebox, [Cp\*Co<sup>III</sup>(tape)Cl]Cl ([1]Cl) (17 mg, 0.03 mmol) was weighed into a 20 mL scintillation vial equipped with a stir bar. Approximately 4 mL of THF was added. To this solution was added dropwise, a 2 mL

solution of [Li(OEt)<sub>2</sub>]B(C<sub>6</sub>F<sub>5</sub>)<sub>4</sub> (29 mg, 0.03 mmol, 1 equiv.) and the reaction was allowed to stir for 1 h at room temperature. The resulting orange solution was filtered through Celite® and the solvent was removed *in-vacuo* to give [1]B(C<sub>6</sub>F<sub>5</sub>)<sub>4</sub> as a brown solid (35 mg, 92%). <sup>1</sup>H NMR (500 MHz, CDCl<sub>3</sub>, 298 K): δ = 5.77 (m, 4H; CH(allyl)), 5.43-5.20 (m (two sets), 8H; CH<sub>2</sub>(allyl)), 3.05 (br, 6H; P-CH<sub>2</sub>(allyl)), 2.54 (m, 2H; P-CH<sub>2</sub>(allyl)), 1.83 (d, <sup>3</sup>J<sub>H,P</sub> = 9.5 Hz, 4H; P-CH<sub>2</sub>-CH<sub>2</sub>-P), 1.61 (t, <sup>5</sup>J<sub>H,P</sub> = 1.7 Hz, 15H; Cp\*H). <sup>13</sup>C{<sup>1</sup>H} NMR (125.8 MHz, CDCl<sub>3</sub>, 298 K): δ = 148.4 (dm, <sup>1</sup>J<sub>C,F</sub> = 238 Hz; B(C<sub>6</sub>F<sub>5</sub>)<sub>4</sub>), 138.4 (dm, <sup>1</sup>J<sub>C,F</sub> = 238 Hz; B(C<sub>6</sub>F<sub>5</sub>)<sub>4</sub>), 136.4 (dm, <sup>1</sup>J<sub>C,F</sub> = 238 Hz; B(C<sub>6</sub>F<sub>5</sub>)<sub>4</sub>), 128.9, 127.7, 122.5, 122.1, 99.4, 31.2 (m), 30.9 (m), 21.5 (t, J<sub>C,P</sub> = 22 Hz), 10.3; B-C of B(C<sub>6</sub>F<sub>5</sub>)<sub>4</sub> not observed. <sup>31</sup>P{<sup>1</sup>H} NMR (202.5 MHz, CDCl<sub>3</sub>, 298 K): δ = + 67.2. <sup>11</sup>B{<sup>1</sup>H} NMR (160.5 MHz, CDCl<sub>3</sub>, 298 K): δ = - 16.6.

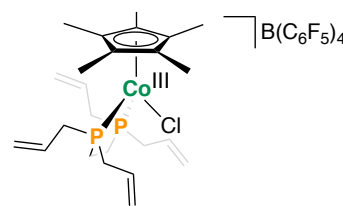

$^{19}\text{F}\{^1\text{H}\}$  NMR (470 MHz,  $\text{CDCl}_3$ , 298 K):  $\delta = -132.5$  (8F,  $F_{\text{ortho}}$ ),  $-162.9$  (t,  $^3J_{\text{F,F}} = 21$  Hz;  $F_{\text{para}}$ ),  $-166.8$  (8F,  $F_{\text{meta}}$ ). HRESI(+)-MS: calcd. 483.1548 exptl. 483.1534 for  $\text{C}_{24}\text{H}_{39}\text{ClP}_2\text{Co}$   $[\text{M}]^+$ .

**[Cp\*Co<sup>I</sup>(tape)] (2;**  $\text{C}_{24}\text{H}_{39}\text{P}_2\text{Co}$ ,  $M_w = 448$  g/mol): In the glovebox,  $[\text{Cp}^*\text{Co}^{\text{II}}(\mu\text{-Cl})_2]$  (20 mg, 0.09 mmol, 0.5 equiv.) and tape (22 mg, 0.09 mmol, 1 equiv.) were combined in a 20 mL scintillation vial equipped with a stir bar. Approximately 4 mL of hexanes was added and the solution was allowed to stir for 1 h at room temperature. The resulting solution was orange in color with ample brown precipitate ( $[\text{1}]\text{Cl}$ ). The solution was decanted away from the solid and the solid was washed with additional hexanes (3 x 5 mL portions) and dried *in-vacuo* to provide  $[\text{1}]\text{Cl}$  (18 mg, 82%). For the isolation of **2**, solvent from the aforementioned hexane washings was removed *in-vacuo*, providing an orange solid that was once again dissolved in hexanes, filtered, and solvent removed to provide **2** (16 mg, 82%).  $^1\text{H}$  NMR (500 MHz,  $\text{tol-d}_8$ , 298 K):  $\delta = 5.92$  (m, 4H;  $\text{CH}(\text{allyl})$ ), 4.93 (dd,  $^2J_{\text{H,H}} = 10$  Hz,  $^3J_{\text{H,H}} = 17$  Hz, 8H;  $\text{CH}_2(\text{allyl})$ ), 2.39 (m, 4H;  $\text{CH}_2(\text{allyl})$ ), 2.30 (m, 4H;  $\text{CH}_2(\text{allyl})$ ), 1.88 (s, 15H; Cp\*H), 1.25 (d,  $^3J_{\text{H,P}} = 12$  Hz, 4H; P- $\text{CH}_2\text{CH}_2$  linker).  $^{13}\text{C}\{^1\text{H}\}$  NMR (125.8 MHz,  $\text{tol-d}_8$ , 298 K):  $\delta = 135.2, 115.3, 88.0, 37.6$  (m), 26.0 (m), 12.1.  $^{31}\text{P}\{^1\text{H}\}$  NMR (202.5 MHz,  $\text{tol-d}_8$ , 298 K):  $\delta = +72.4$ . Compound was isolated as an oil, elemental analysis was not performed. Clean  $^1\text{H}$  and  $^{31}\text{P}$  NMR data indicate >95% purity.

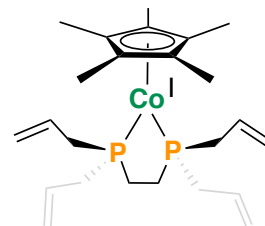

**[Cp\*Co<sup>III</sup>(Cl)(P<sub>2</sub>B<sup>Cy</sup><sub>4</sub>)]B(C<sub>6</sub>F<sub>5</sub>)<sub>4</sub> ([3]B(C<sub>6</sub>F<sub>5</sub>)<sub>4</sub>;**

$\text{C}_9\text{H}_{131}\text{B}_5\text{ClP}_2\text{F}_{20}\text{Co}$ ,  $M_w = 1875$  g/mol): In the glovebox,  $[\text{Cp}^*\text{Co}^{\text{III}}(\text{tape})\text{Cl}]\text{B}(\text{C}_6\text{F}_5)_4$  ( $[\text{1}]\text{B}(\text{C}_6\text{F}_5)_4$ ) (15 mg, 0.013 mmol) and  $\text{HBCy}_2$  (9 mg, 0.052 mmol, 4 equiv.) were added to a 20 mL scintillation vial equipped with a stir bar. Approximately 4 mL of THF was added and the solution was allowed to stir for 30 min at room

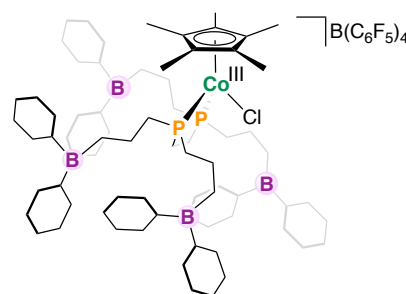

temperature. The resulting orange solution was filtered through Celite<sup>®</sup> and the solvent was removed *in-vacuo* to give an orange oil (15 mg, 62%).  $^1\text{H}$  NMR (500 MHz,  $\text{CDCl}_3$ , 298 K):  $\delta = 1.55$  (s, 15H, Cp\* (located by  $^1\text{H}$ - $^{13}\text{C}$  HSQC), 1.94-1.00 (multiple overlapping  $\text{C}(\text{sp}^3)\text{-H}$  resonances).  $^{13}\text{C}\{^1\text{H}\}$  NMR (125.8 MHz,  $\text{CDCl}_3$ , 298 K):  $\delta = 148.4$  (dm,  $^1J_{\text{C,F}} = 238$  Hz;  $\text{B}(\text{C}_6\text{F}_5)_4$ ), 138.4 (dm,  $^1J_{\text{C,F}} = 238$  Hz;  $\text{B}(\text{C}_6\text{F}_5)_4$ ), 125.2 (br), 98.6, 36.0, 35.9, 34.9, 27.6, 27.1, 25.5, 21.1, 19.6, 10.1; some overlapping, B-C of  $\text{B}(\text{C}_6\text{F}_5)_4$  not observed.  $^{31}\text{P}\{^1\text{H}\}$  NMR

(202.5 MHz, CDCl<sub>3</sub>, 298 K):  $\delta = + 66.4$ . <sup>11</sup>B{<sup>1</sup>H} NMR (160.5 MHz, CDCl<sub>3</sub>, 298 K):  $\delta = + 83$  ( $\Delta_{1/2} = 1230$  Hz),  $- 16.6$  (B(C<sub>6</sub>F<sub>5</sub>)<sub>4</sub>). <sup>19</sup>F{<sup>1</sup>H} NMR (470 MHz, CDCl<sub>3</sub>, 298 K):  $\delta = -132.6$  (8F, F<sub>ortho</sub>),  $-164.9$  (t, <sup>3</sup>J<sub>F,F</sub> = 21 Hz; F<sub>para</sub>),  $-168.4$  (8F, F<sub>meta</sub>). **Anal. Calcd.** For C<sub>96</sub>H<sub>131</sub>B<sub>5</sub>ClP<sub>2</sub>F<sub>20</sub>Co: C, 61.48; H, 7.04. Best Found: C, 59.87; H, 6.72; these results are outside the range viewed as establishing analytical purity, but are provided to illustrate the best values obtained to date. Clean <sup>1</sup>H and <sup>31</sup>P NMR data indicate >95% purity.

[Cp\*Co<sup>I</sup>(P<sub>2</sub>B<sup>Cy</sup><sub>4</sub>)] (**4**; C<sub>72</sub>H<sub>131</sub>B<sub>4</sub>P<sub>2</sub>Co, M<sub>w</sub> = 1161 g/mol): In the glovebox, [Cp\*Co<sup>I</sup>(tape)] (**2**) (10 mg, 0.022 mmol) and HBCy<sub>2</sub> (16 mg, 0.09 mmol, 4 equiv.) were added to a 20 mL scintillation vial equipped with a stir bar. Approximately 4 mL of toluene was added and the solution was allowed to stir for 30 min at room temperature. The resulting orange solution was filtered

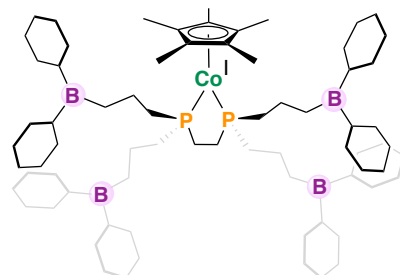

through Celite<sup>®</sup> and the solvent was removed *in-vacuo* to give an orange oil (24 mg, 93%). <sup>1</sup>H NMR (500 MHz, tol-*d*<sub>8</sub>, 298 K):  $\delta = 2.04$  (s, 15H; Cp\*), 2.00-1.02 (multiple overlapping C(sp<sup>3</sup>)-H resonances). <sup>13</sup>C{<sup>1</sup>H} NMR (125.8 MHz, C<sub>6</sub>D<sub>6</sub>, 298 K):  $\delta = 87.6, 36.3, 36.1$  (m), 28.1, 28.0, 27.8, 27.6, 27.5, 20.6, 12.5. <sup>31</sup>P{<sup>1</sup>H} NMR (202.5 MHz, tol-*d*<sub>8</sub>, 298 K):  $\delta = + 82.5$ . <sup>11</sup>B{<sup>1</sup>H} NMR (160.5 MHz, tol-*d*<sub>8</sub>, 298 K):  $\delta = + 85$  ( $\Delta_{1/2} = 1250$  Hz). Compound was isolated as an oil, elemental analysis was not performed. Clean <sup>1</sup>H and <sup>31</sup>P NMR data indicate >95% purity.

[Cp\*Co<sup>III</sup>(H)(P<sub>2</sub>B<sup>Cy</sup><sub>4</sub>)]BPh<sub>4</sub> ([**5**]BPh<sub>4</sub>: C<sub>96</sub>H<sub>152</sub>B<sub>5</sub>P<sub>2</sub>Co, M<sub>w</sub> = 1481 g/mol): In the glovebox, [Cp\*Co<sup>I</sup>(P<sub>2</sub>B<sup>Cy</sup><sub>4</sub>)] (**4**) (16 mg, 0.01 mmol) was dissolved in 4 mL THF and [HNEt<sub>3</sub>]BPh<sub>4</sub> (6 mg, 0.01 mmol, 1 equiv.) in 1 mL THF was added dropwise. The resulting orange solution was stirred for 30 min at room temperature and the solvent was removed *in-vacuo* giving an orange oil, which was washed with hexanes (20 mL) to provide a yellow powder (15 mg, 73%). Small yellow crystals of [**5**]BPh<sub>4</sub> could be grown from a hexanes-layered THF solution. <sup>1</sup>H NMR (500 MHz, THF-*d*<sub>8</sub>, 298 K):  $\delta = 7.27$  (br, 8H; BPh<sub>4</sub>), 6.84 (t, 8H, <sup>3</sup>J<sub>H,H</sub> = 7.1 Hz; BPh<sub>4</sub>), 6.70 (t, 4H, <sup>3</sup>J<sub>H,H</sub> = 7.1 Hz; BPh<sub>4</sub>), 1.83 (s, 15H; Cp\*), 1.80-1.10 (multiple overlapping C(sp<sup>3</sup>)-H resonances),  $-16.8$  (t, <sup>2</sup>J<sub>H,P</sub> = 67.6 Hz; Co<sup>III</sup>-H).

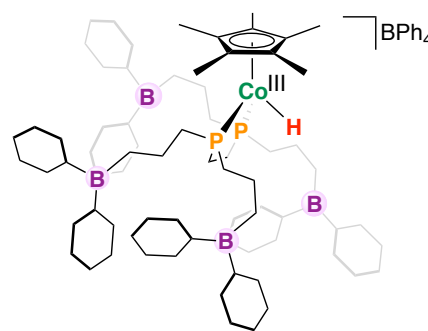

$^{13}\text{C}\{^1\text{H}\}$  NMR (125.8 MHz, THF- $d_8$ , 298 K):  $\delta$  = 165.1 (q,  $^1J_{\text{B,C}} = 50.9$  Hz;  $\text{BPh}_4^-$ ), 135.4 ( $\text{BPh}_4^-$ ), 123.8 ( $\text{BPh}_4^-$ ), 119.9 ( $\text{BPh}_4^-$ ), 94.3, 34.0, 33.8, 30.7, 27.0, 26.9 (2 signals), 26.8 (2 signals), 26.7 (2 signals), 26.3 (2 signals), 23.9, 19.1, 9.1.  $^{31}\text{P}\{^1\text{H}\}$  NMR (202.5 MHz, THF- $d_8$ , 298 K):  $\delta$  = + 80.0 (d,  $^2J_{\text{H,P}} = 67.6$  Hz).  $^{11}\text{B}\{^1\text{H}\}$  NMR (160.5 MHz, THF- $d_8$ , 298 K):  $\delta$  = 85 ( $\Delta_{1/2} = 1300$  Hz), - 6.5 ( $\text{BPh}_4^-$ ). FT-IR (NaCl plate,  $\text{cm}^{-1}$ ): 1937 (very broad, Co–H). Anal. Calcd. For  $\text{C}_{96}\text{H}_{152}\text{B}_5\text{P}_2\text{Co}$ : C, 77.85; H, 10.34. Best Found: C, 76.77; H, 11.17; these results are outside the range viewed as establishing analytical purity, but are provided to illustrate the best values obtained to date. Clean  $^1\text{H}$  and  $^{31}\text{P}$  NMR data indicate >95% purity.

**$[\text{Cp}^*\text{Co}^{\text{III}}(\text{H})(\text{P}_2\text{BCy}_4)(\text{DMAP})_4]\text{BPh}_4$**  ([6] $\text{BPh}_4$ :

$\text{C}_{124}\text{H}_{192}\text{B}_5\text{P}_2\text{CoN}_8$ ,  $M_w = 1969$  g/mol): In the glovebox, [5] $\text{BPh}_4$  (15 mg, 0.01 mmol) was dissolved in 3 mL THF and DMAP (5 mg, 0.04 mmol, 4 equivs.) was added. The reaction mixture was allowed to stir for 5 mins and then solvent was removed *in-vacuo* giving a yellow oil, which was washed with hexanes (20 mL) to provide a yellow powder (19 mg, 95%).  $^1\text{H}$  NMR

(500 MHz, THF- $d_8$ , 298 K):  $\delta$  = 7.96 (br, 8H;  $\text{DMAP}|C\text{-H}_{\text{ortho}}$ ), 7.29 (br, 8H;  $\text{BPh}_4^-$ ), 6.83 (t,  $^3J_{\text{HH}} = 7.3$  Hz, 8H;  $\text{BPh}_4^-$ ), 6.69 (t,  $^3J_{\text{H,H}} = 7.3$  Hz, 4H;  $\text{BPh}_4^-$ ), 6.58 (br, 8H;  $\text{DMAP}|C\text{-H}_{\text{meta}}$ ), 2.99 (s, 24H;  $\text{DMAP}|N\text{Me}_2$ ), 1.90 (s, 15H;  $\text{Cp}^*$ ), 1.78-0.53 (overlapping  $C(sp^3)\text{-H}$  resonances), -16.9 (t,  $^2J_{\text{H,P}} = 68.4$  Hz;  $\text{Co}^{\text{III}}\text{-H}$ ).  $^{13}\text{C}\{^1\text{H}\}$  NMR (125.8 MHz, THF- $d_8$ , 298 K, select signal only):  $\delta$  = 9.8 ( $\text{Cp}^*$  from  $^1\text{H}\text{-}^{13}\text{C}$  HSQC).  $^{31}\text{P}$  NMR (202.5 MHz, THF- $d_8$ , 298 K):  $\delta$  = + 78.7 (d,  $^2J_{\text{H,P}} = 68.4$  Hz).  $^{11}\text{B}\{^1\text{H}\}$  NMR (160.5 MHz, THF- $d_8$ , 193 K):  $\delta$  = -5.1 ( $\text{RBCy}_2\text{DMAP}$ ) -6.5 ( $\text{BPh}_4^-$ ). FT-IR (NaCl plate,  $\text{cm}^{-1}$ ): 1937 (br, Co–H).

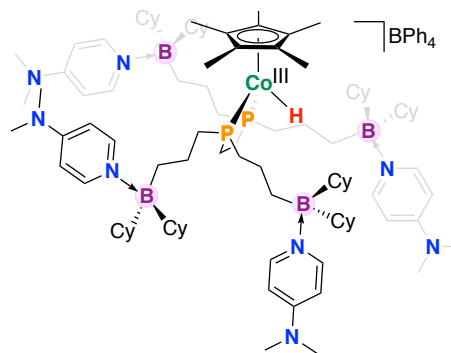

**$[\text{Cp}^*\text{Co}^{\text{I}}(\text{dnppe})]$  (7;  $\text{C}_{24}\text{H}_{47}\text{P}_2\text{Co}$ ,  $M_w = 456$  g/mol):**

In the glovebox,  $[\text{Cp}^*\text{Co}^{\text{II}}(\mu\text{-Cl})_2]$  (30 mg, 0.07 mmol, 0.5 equiv.) and dnppe (34 mg, 0.14 mmol, 1 equiv.) were combined in a 20 mL scintillation vial equipped with a stir bar. Approximately 4 mL of hexanes was added and the solution was allowed to stir for 1 h at room temperature. The resulting solution was orange in color with ample brown precipitate. The solution was filtered away from the solid and the solid was washed with additional hexanes (3 x 5 mL portions). Combination of the hexanes washings and removal of solvent *in-vacuo* provided an orange solid that was one again dissolved in hexanes, filtered, and solvent removed to provide 7 (23 mg, 79%).  $^1\text{H}$  NMR

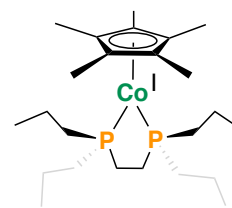

(500 MHz, THF- $d_8$ , 298 K):  $\delta$  = 1.79 (s, 15H; Cp\*H), 1.72 (m, 4H; under THF- $d_8$ ), 1.53 (m, 4H), 1.44 (m, 4H), 1.26 (m, 4H; P-CH<sub>2</sub>CH<sub>2</sub> linker), 1.19 (m, 4H), 0.99 (t,  $^3J_{H,H}$  = 7.3 Hz, 12H).  $^{13}\text{C}\{^1\text{H}\}$  NMR (125.8 MHz, THF- $d_8$ , 298 K):  $\delta$  = 87.4, 34.9 (m), 28.5 (m), 19.4, 16.4 (m), 12.1.  $^{31}\text{P}\{^1\text{H}\}$  NMR (202.5 MHz, THF- $d_8$ , 298 K):  $\delta$  = + 84.2. Compound was isolated as an oil, elemental analysis was not performed. Clean  $^1\text{H}$  and  $^{31}\text{P}$  NMR data indicate >95% purity.

**[Cp\*Co<sup>III</sup>(H)(dnppe)]BPh<sub>4</sub>** ([8]BPh<sub>4</sub>: C<sub>48</sub>H<sub>68</sub>BP<sub>2</sub>Co, M<sub>w</sub> = 776 g/mol): In the glovebox, [Cp\*Co<sup>I</sup>(dnppe)] (7) (23 mg, 0.05 mmol) was dissolved in 4 mL THF and [HNEt<sub>3</sub>]BPh<sub>4</sub> (19 mg, 0.045 mmol, 0.9 equiv.) in 1 mL THF was added dropwise. The resulting orange solution was stirred for 30 min at room temperature and the solvent was removed *in-*

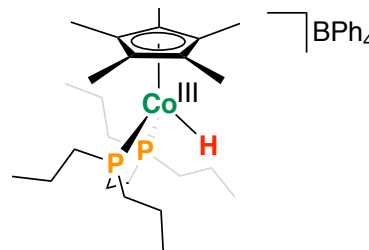

*vacuo* giving an orange oil, which was washed with hexanes (20 mL) to provide a yellow powder. Yellow crystals of [8]BPh<sub>4</sub> could be grown from a hexanes-layered THF solution (34 mg, 87%).  $^1\text{H}$  NMR (500 MHz, THF- $d_8$ , 298 K):  $\delta$  = 7.27 (br, 8H; BPh<sub>4</sub>), 6.85 (t, 8H,  $^3J_{HH}$  = 7.1 Hz; BPh<sub>4</sub>), 6.71 (t, 4H,  $^3J_{H,H}$  = 7.1 Hz; BPh<sub>4</sub>), 1.83 (m, 4H), 1.76 (s, 15H; Cp\*), 1.70-1.14 (multiple overlapping C(sp<sup>3</sup>)-H resonances), 1.02 (t,  $^3J_{H,H}$  = 7.3 Hz, 12H), -16.8 (t,  $^2J_{H,P}$  = 67.6 Hz; Co<sup>III</sup>-H).  $^{13}\text{C}\{^1\text{H}\}$  NMR (125.8 MHz, THF- $d_8$ , 298 K):  $\delta$  = 165.1 (q,  $^1J_{B,C}$  = 50.9 Hz; BPh<sub>4</sub>), 137.0 (BPh<sub>4</sub>), 125.5 (BPh<sub>4</sub>), 121.6 (BPh<sub>4</sub>), 95.9, 30.7 (m), 30.1 (m), 18.7, 15.9 (m), 16.0 (m), 10.4.  $^{31}\text{P}\{^1\text{H}\}$  NMR (202.5 MHz, THF- $d_8$ , 298 K):  $\delta$  = + 81.4 (d,  $^2J_{H,P}$  = 67.6 Hz).  $^{11}\text{B}\{^1\text{H}\}$  NMR (160.5 MHz, THF- $d_8$ , 298 K):  $\delta$  = - 6.5 (BPh<sub>4</sub>). FT-IR (ATR, cm<sup>-1</sup>): 1939 (Co-H). **Anal. Calcd.** For C<sub>48</sub>H<sub>68</sub>BP<sub>2</sub>Co: C, 74.22; H, 8.82. Found: C, 74.31; H, 8.72.

**[Cp\*Co<sup>III</sup>(Cl)(dnppe)]B(C<sub>6</sub>F<sub>5</sub>)<sub>4</sub>** ([9]B(C<sub>6</sub>F<sub>5</sub>)<sub>4</sub>; C<sub>48</sub>H<sub>47</sub>BClP<sub>2</sub>F<sub>20</sub>Co, M<sub>w</sub> = 1171 g/mol): In the glovebox, [Cp\*Co<sup>II</sup>(μ-Cl)]<sub>2</sub> (30 mg, 0.07 mmol, 0.5 equiv.) and dnppe (34 mg, 0.14 mmol, 1 equiv.) were combined in a 20 mL scintillation vial equipped with a stir bar. Approximately 4 mL of hexanes was added and the solution was allowed to

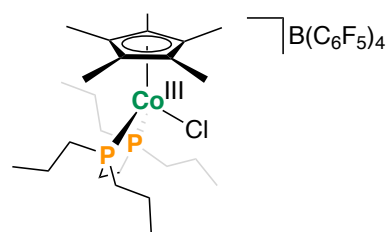

stir for 1 h at room temperature. The resulting solution was orange in color with ample brown precipitate of [9]Cl. The solution was filtered away from the solid and the solid was washed with additional hexanes (3 x 5 mL portions) to remove 7. Crude [9]Cl was then dissolved in THF (4 mL) and [Li(OEt<sub>2</sub>)<sub>2</sub>]B(C<sub>6</sub>F<sub>5</sub>)<sub>4</sub> (58 mg, 0.07 mmol, 1 equiv.) was

added in a single portion. The reaction was allowed to stir for 1 h at room temperature. The resulting orange solution was filtered through Celite® and the solvent was removed *in-vacuo* to give [9]B(C<sub>6</sub>F<sub>5</sub>)<sub>4</sub> as a brown solid (70 mg, 90%). <sup>1</sup>H NMR (500 MHz, THF-d<sub>8</sub>, 298 K): δ = 2.24 (m, 2H), 2.16 (m, 2H), 1.94 (m, 4H), 1.75 (m, 4H; under THF), 1.65 (m, 8H), 1.58 (s, 15H; Cp\*), 1.10 (t, <sup>3</sup>J<sub>H,H</sub> = 7.2 Hz, 6H), 1.04 (t, <sup>3</sup>J<sub>H,H</sub> = 7.2 Hz, 6H). <sup>13</sup>C{<sup>1</sup>H} NMR (125.8 MHz, THF-d<sub>8</sub>, 298 K): δ = 148.9 (dm, <sup>1</sup>J<sub>C,F</sub> = 238 Hz; B(C<sub>6</sub>F<sub>5</sub>)<sub>4</sub>), 137.9 (dm, <sup>1</sup>J<sub>C,F</sub> = 238 Hz; B(C<sub>6</sub>F<sub>5</sub>)<sub>4</sub>), 125.2 (br), 28.9 (m), 28.0 (m), 21.7 (m), 19.8, 18.8 (m), 15.9 (m), 9.93, B-C of B(C<sub>6</sub>F<sub>5</sub>)<sub>4</sub> not observed. <sup>31</sup>P{<sup>1</sup>H} NMR (202.5 MHz, THF-d<sub>8</sub>, 298 K): δ = + 68.4. <sup>11</sup>B{<sup>1</sup>H} NMR (160.5 MHz, CDCl<sub>3</sub>, 298 K): δ = - 16.6 (B(C<sub>6</sub>F<sub>5</sub>)<sub>4</sub>). <sup>19</sup>F{<sup>1</sup>H} NMR (470 MHz, THF-d<sub>8</sub>, 298 K): δ = -132.6 (8F, F<sub>ortho</sub>), -164.9 (t, <sup>3</sup>J<sub>F,F</sub> = 21 Hz; F<sub>para</sub>), -168.4 (8F, F<sub>meta</sub>).

**Treatment of 4 with benzoic acids.** In the glovebox, ~ 10 mg of [Cp\*Co<sup>I</sup>(P<sub>2</sub>B<sup>Cy</sup><sub>4</sub>)] (4) and a benzoic acid derivative (4 equivs.) were combined and dissolved in *ca.* 500 μL THF-d<sub>8</sub>. The mixture was transferred to a J. Young NMR tube, removed from the glovebox, and immediately analyzed by NMR spectroscopy. These protonation experiments were performed in THF-d<sub>8</sub> and not acetonitrile due to insolubility of compound 4 in the latter.

**Reaction of 4 with 4 equivs. PhCO<sub>2</sub>H: NMR Characterization of [5]O<sub>2</sub>CPh.** <sup>1</sup>H NMR (500 MHz, THF-d<sub>8</sub>, 298 K): δ = 11.27 (br, 1H; residual PhCO<sub>2</sub>H), 8.01 (d, <sup>3</sup>J<sub>H,H</sub> = 7.5 Hz; H<sub>o</sub> residual PhCO<sub>2</sub>H/PhCO<sub>2</sub><sup>-</sup> counteranion), 7.47 (t, <sup>3</sup>J<sub>H,H</sub> = 7.1 Hz; H<sub>p</sub> for residual PhCO<sub>2</sub>H/PhCO<sub>2</sub><sup>-</sup> counteranion), 7.38 (t, <sup>3</sup>J<sub>H,H</sub> = 7.5 Hz; H<sub>m</sub> residual PhCO<sub>2</sub>H/PhCO<sub>2</sub><sup>-</sup> counteranion), 1.87 (s, 15H; Cp\*), -17.0 (t, <sup>2</sup>J<sub>H,P</sub> = 66.3 Hz; Co<sup>III</sup>-H). <sup>31</sup>P{<sup>1</sup>H} NMR (202.5 MHz, THF-d<sub>8</sub>, 298 K): δ = + 80.8 (d, <sup>2</sup>J<sub>H,P</sub> = 66.3 Hz).

**Reaction of 4 with 4 equivs. 4-PyrCO<sub>2</sub>H: NMR Characterization of [5]<sup>+</sup>.** <sup>1</sup>H NMR (500 MHz, THF-d<sub>8</sub>, 298 K): δ = 8.69 (br, 8H; H<sub>o</sub> (to pyridine) of 4-PyrCO<sub>2</sub>H/4-PyrCO<sub>2</sub><sup>-</sup> counteranion), 8.06 (br, 8H; H<sub>m</sub> (to pyridine) of 4-PyrCO<sub>2</sub>H/4-PyrCO<sub>2</sub><sup>-</sup> counteranion), 1.85 (s, 15H; Cp\*), -17.1 (t, <sup>2</sup>J<sub>H,P</sub> = 66.1 Hz; Co<sup>III</sup>-H), downfield-shifted 1H for residual carboxylic acid not observed. <sup>31</sup>P{<sup>1</sup>H} NMR (202.5 MHz, THF-d<sub>8</sub>, 298 K): δ = + 78.0 (br). **Note:** 4-PyrCO<sub>2</sub>H is poorly soluble in THF-d<sub>8</sub> or MeCN-d<sub>3</sub>.

**Reaction of 4 with 1 equiv. PhCO<sub>2</sub>H: NMR Characterization of [5]O<sub>2</sub>CPh.** <sup>1</sup>H NMR (500 MHz, THF-d<sub>8</sub>, 298 K): δ = 8.01 (d, <sup>3</sup>J<sub>H,H</sub> = 7.5 Hz, 2H; H<sub>o</sub>), 7.22 (m, 3H; H<sub>m</sub> + H<sub>p</sub>), 1.87



(s, 15H; Cp\*), -17.0 (t,  $^2J_{\text{H,P}} = 66.3$  Hz; Co<sup>III</sup>-H).  $^{31}\text{P}\{^1\text{H}\}$  NMR (202.5 MHz, THF-d<sub>8</sub>, 298 K):  $\delta = +80.8$  (d,  $^2J_{\text{H,P}} = 66.3$  Hz).  $^1\text{H}$  NMR (500 MHz, C<sub>6</sub>D<sub>6</sub>, 298 K):  $\delta = 8.65$  (d,  $^3J_{\text{H,H}} = 7.5$  Hz, 2H; H<sub>o</sub>), 7.32 (t,  $^3J_{\text{H,H}} = 7.5$  Hz, 2H; H<sub>m</sub>), 7.23 (t,  $^3J_{\text{H,H}} = 7.3$  Hz, 1H; H<sub>p</sub>), 1.51 (s, 15H; Cp\*), -17.2 (t,  $^2J_{\text{H,P}} = 66.3$  Hz; Co<sup>III</sup>-H).  $^{31}\text{P}\{^1\text{H}\}$  NMR (202.5 MHz, C<sub>6</sub>D<sub>6</sub>, 298 K):  $\delta = +81.3$  (d,  $^2J_{\text{H,P}} = 66.3$  Hz).

**Treatment of BCy<sub>2</sub>"OCT with benzoic acids.** In the glovebox, ~ 40 mg of BCy<sub>2</sub>"OCT and benzoic acid or 4-pyridylbenzoic acid (1 equiv.) were combined and dissolved in *ca.* 500  $\mu\text{L}$  THF-d<sub>8</sub>. The mixture was transferred to a J. Young NMR tube, removed from the glovebox, and immediately analyzed by NMR spectroscopy, which evidenced an adduct for 4-pyridylbenzoic acid and no reaction for benzoic acid.

**Table S1.** Summary of Data obtained for Cobalt Compounds

| Compound                                          | Name                                                                                                                                                                                    | Formula                                                                             | Mw (g/mol) | $\delta_{\text{H}}$ (Cp*) (ppm) | $\delta_{\text{P}}$ (ppm)                |
|---------------------------------------------------|-----------------------------------------------------------------------------------------------------------------------------------------------------------------------------------------|-------------------------------------------------------------------------------------|------------|---------------------------------|------------------------------------------|
| [1]Cl                                             | [Cp*Co <sup>III</sup> (tape)Cl]Cl                                                                                                                                                       | C <sub>24</sub> H <sub>39</sub> Cl <sub>2</sub> P <sub>2</sub> Co                   | 519        | 1.45 (CDCl <sub>3</sub> )       | 65.3 (CDCl <sub>3</sub> )                |
| [1]B(C <sub>6</sub> F <sub>5</sub> ) <sub>4</sub> | [Cp*Co <sup>III</sup> (tape)Cl]B(C <sub>6</sub> F <sub>5</sub> ) <sub>4</sub>                                                                                                           | C <sub>48</sub> H <sub>39</sub> BClF <sub>20</sub> P <sub>2</sub> Co                | 1163       | 1.61 (CDCl <sub>3</sub> )       | 67.2 (CDCl <sub>3</sub> )                |
| <b>2</b>                                          | [Cp*Co <sup>I</sup> (tape)]                                                                                                                                                             | C <sub>24</sub> H <sub>39</sub> P <sub>2</sub> Co                                   | 448        | 1.88 (tol-d <sub>8</sub> )      | 72.4 (tol-d <sub>8</sub> )               |
| [3]B(C <sub>6</sub> F <sub>5</sub> ) <sub>4</sub> | [Cp*Co <sup>III</sup> (Cl)(P <sub>2</sub> B <sup>Cy</sup> <sub>4</sub> )]B(C <sub>6</sub> F <sub>5</sub> ) <sub>4</sub>                                                                 | C <sub>96</sub> H <sub>131</sub> B <sub>5</sub> ClP <sub>2</sub> F <sub>20</sub> Co | 1875       | 1.55 (CDCl <sub>3</sub> )       | 66.4 (CDCl <sub>3</sub> )                |
| <b>4</b>                                          | [Cp*Co <sup>I</sup> (P <sub>2</sub> B <sup>Cy</sup> <sub>4</sub> )]                                                                                                                     | C <sub>72</sub> H <sub>131</sub> B <sub>4</sub> P <sub>2</sub> Co                   | 1161       | 2.04 (tol-d <sub>8</sub> )      | 82.5 (tol-d <sub>8</sub> )               |
| [5]BPh <sub>4</sub>                               | [Cp*Co <sup>III</sup> (H)(P <sub>2</sub> B <sup>Cy</sup> <sub>4</sub> )]BPh <sub>4</sub><br>[Cp*Co <sup>III</sup> (H)(P <sub>2</sub> B <sup>Cy</sup> <sub>4</sub> )(DMAP)] <sub>4</sub> | C <sub>96</sub> H <sub>152</sub> B <sub>5</sub> P <sub>2</sub> Co                   | 1481       | 1.83 (THF-d <sub>8</sub> )      | 80.0 (THF-d <sub>8</sub> ) <sup>a</sup>  |
| [6]BPh <sub>4</sub>                               | ]BPh <sub>4</sub>                                                                                                                                                                       | C <sub>124</sub> H <sub>192</sub> B <sub>5</sub> P <sub>2</sub> N <sub>8</sub> Co   | 1969       | 1.90 (THF-d <sub>8</sub> )      | 78.7 (THF-d <sub>8</sub> ) <sup>b</sup>  |
| <b>7</b>                                          | [Cp*Co <sup>I</sup> (dnppe)]                                                                                                                                                            | C <sub>24</sub> H <sub>47</sub> P <sub>2</sub> Co                                   | 456        | 1.79 (THF-d <sub>8</sub> )      | 84.2 ( THF-d <sub>8</sub> )              |
| [8]BPh <sub>4</sub>                               | [Cp*Co <sup>III</sup> (H)(dnppe)]BPh <sub>4</sub>                                                                                                                                       | C <sub>48</sub> H <sub>68</sub> BP <sub>2</sub> Co                                  | 776        | 1.76 (THF-d <sub>8</sub> )      | 81.4 ( THF-d <sub>8</sub> ) <sup>c</sup> |
| [9]B(C <sub>6</sub> F <sub>5</sub> ) <sub>4</sub> | [Cp*Co <sup>III</sup> (dnppe)Cl]B(C <sub>6</sub> F <sub>5</sub> ) <sub>4</sub>                                                                                                          | C <sub>48</sub> H <sub>47</sub> BClP <sub>2</sub> F <sub>20</sub> Co                | 1171       | 1.58 (THF-d <sub>8</sub> )      | 68.4 (THF-d <sub>8</sub> )               |

<sup>a</sup> Doublet with <sup>2</sup>J<sub>H,P</sub> = 67.6 Hz (THF-d<sub>8</sub>). <sup>b</sup> Doublet with <sup>2</sup>J<sub>H,P</sub> = 68.4 Hz (THF-d<sub>8</sub>). <sup>c</sup> Doublet with <sup>2</sup>J<sub>H,P</sub> = 67.6 Hz (THF-d<sub>8</sub>).

Figure S1. [1]Cl,  $^1\text{H}$  NMR,  $\text{CDCl}_3$ , 500 MHz, 298 K

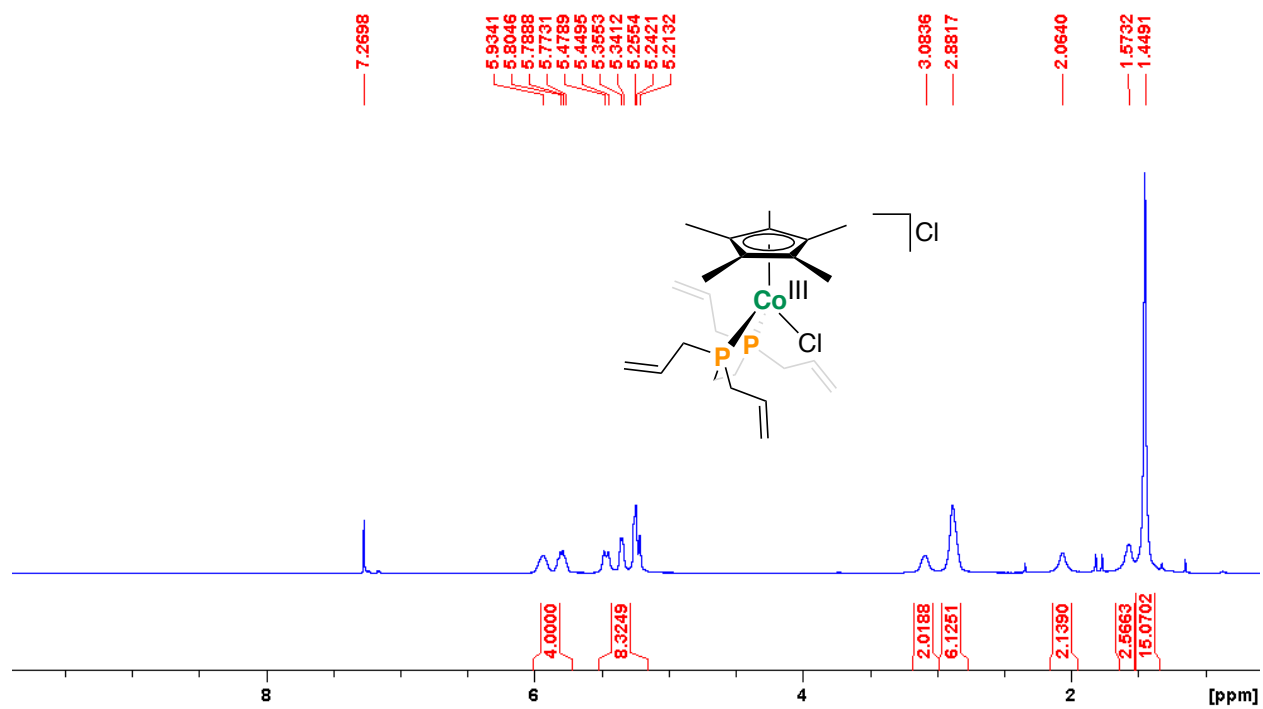

Figure S2. [1]Cl,  $^{31}\text{P}\{^1\text{H}\}$  NMR,  $\text{CDCl}_3$ , 203 MHz, 298 K

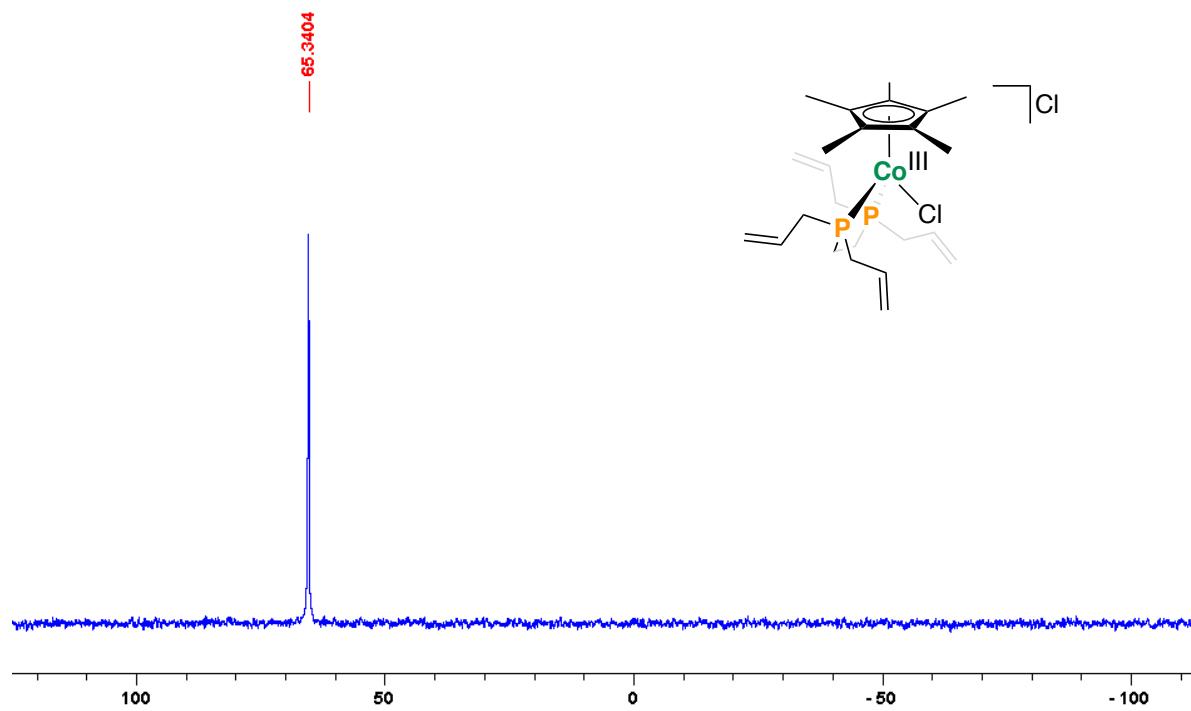



Figure S5.  $[1]B(C_6F_5)_4$ ,  $^{31}P\{^1H\}$  NMR,  $CDCl_3$ , 203 MHz, 298 K

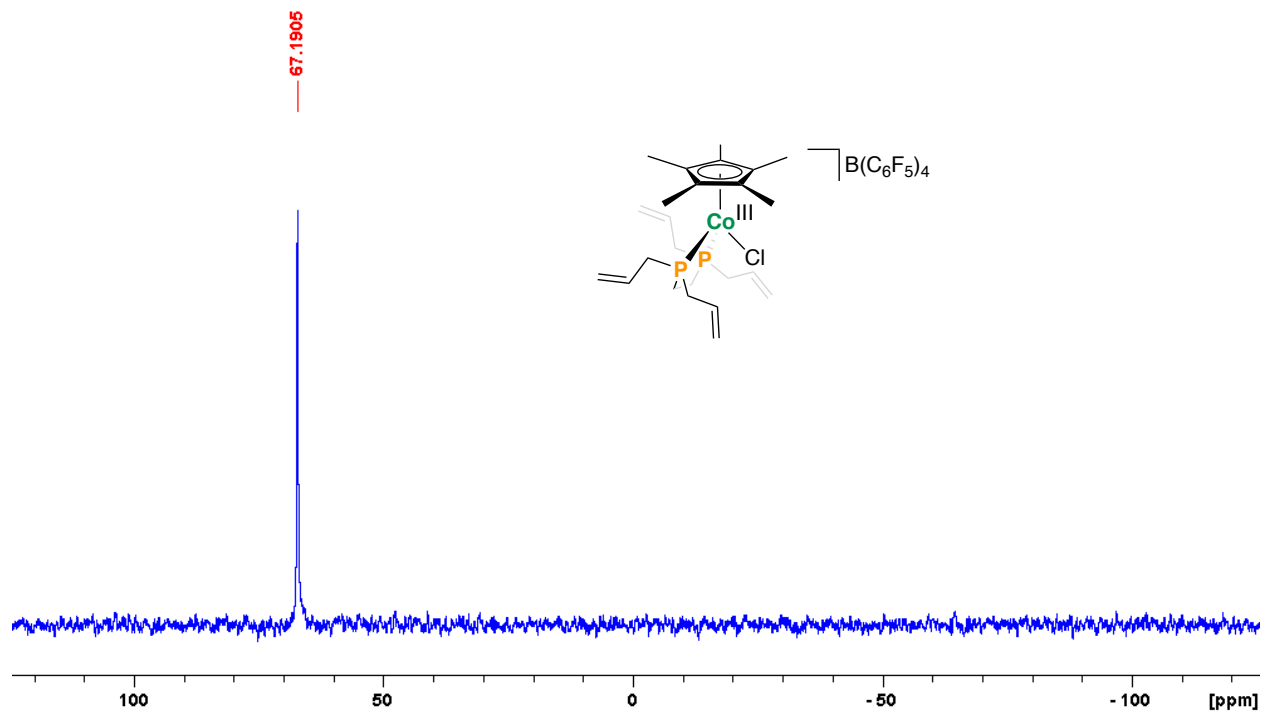

Figure S6.  $[1]B(C_6F_5)_4$ ,  $^{11}B\{^1H\}$  NMR,  $CDCl_3$ , 160.5 MHz, 298 K

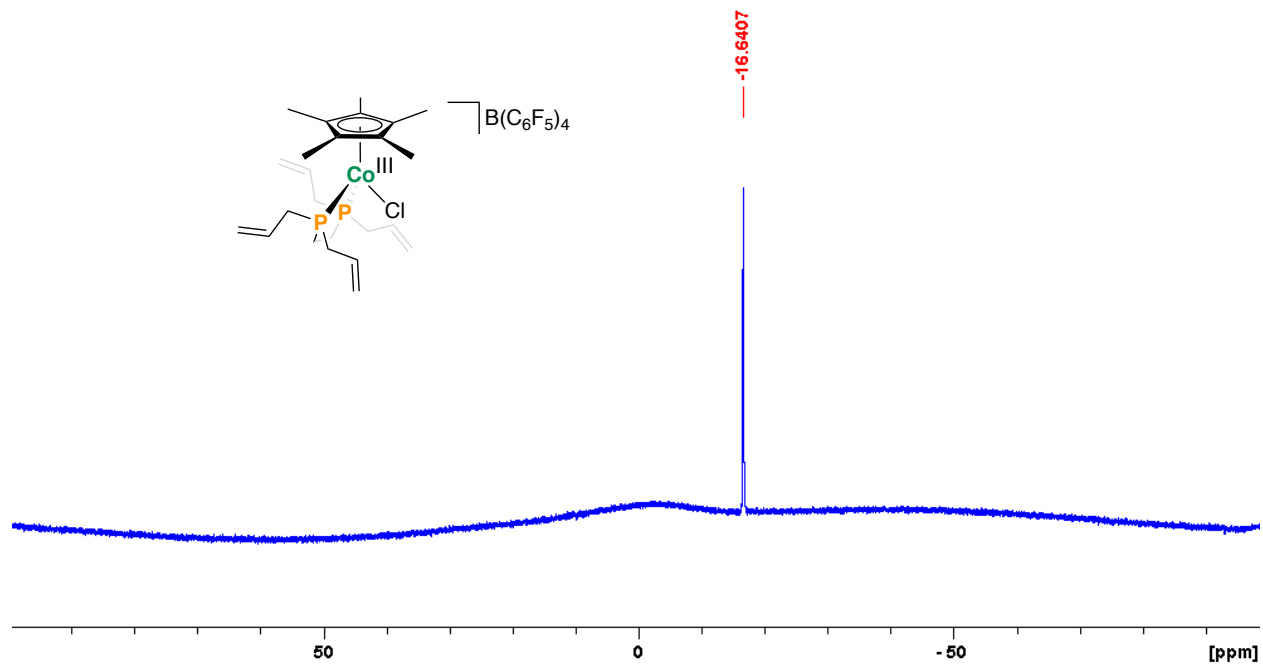

Figure S7. [1]B(C<sub>6</sub>F<sub>5</sub>)<sub>4</sub>, <sup>19</sup>F{<sup>1</sup>H} NMR, CDCl<sub>3</sub>, 470 MHz, 298 K

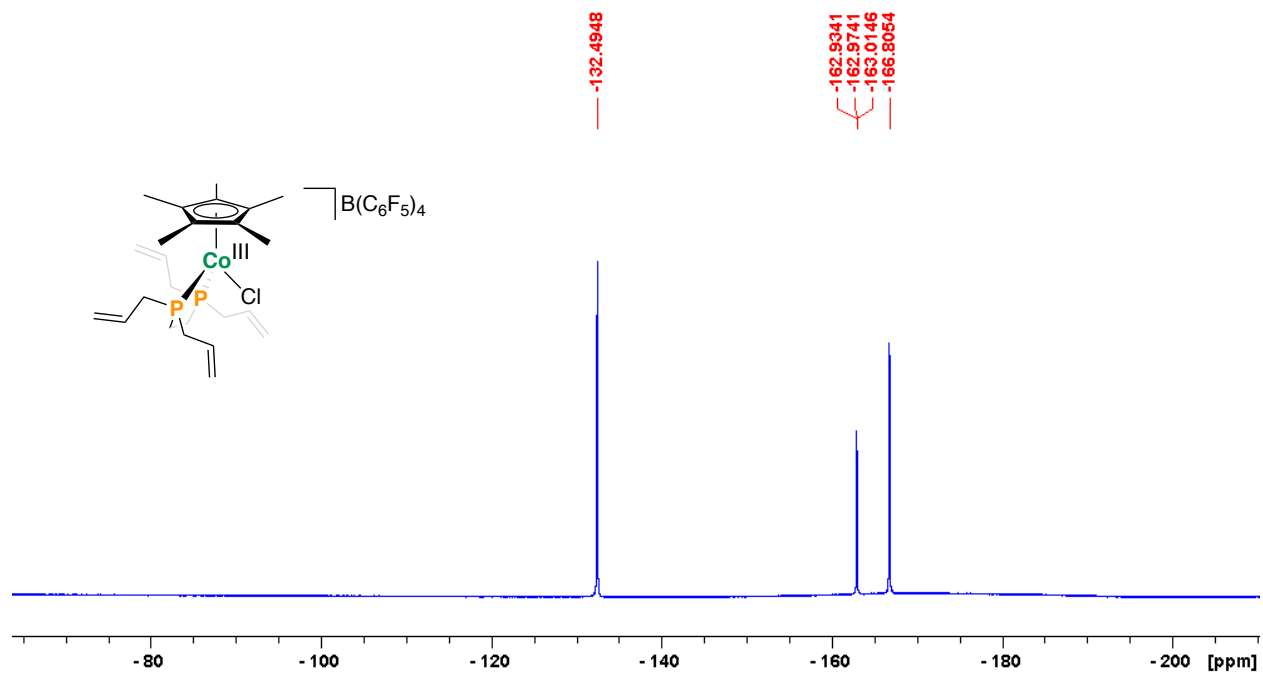

Figure S8. [1]B(C<sub>6</sub>F<sub>5</sub>)<sub>4</sub>, <sup>13</sup>C{<sup>1</sup>H} NMR, CDCl<sub>3</sub>, 125 MHz, 298 K

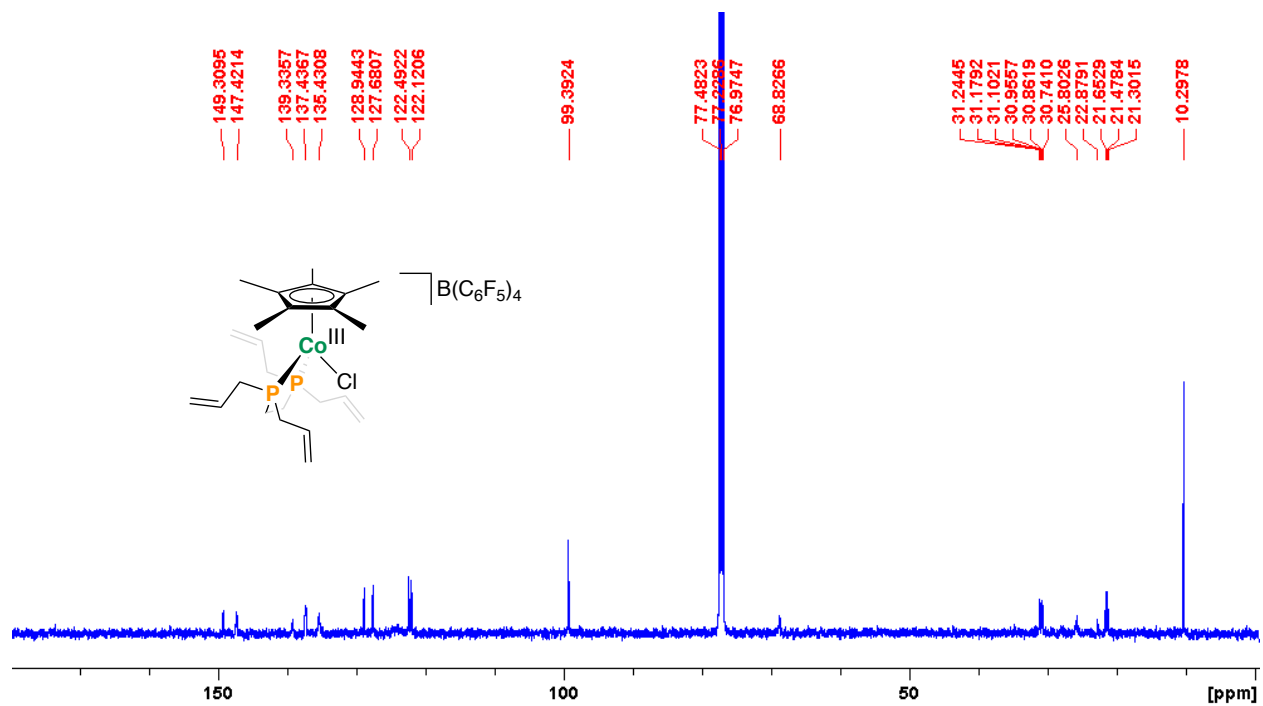

Figure S9. 2,  $^1\text{H}$  NMR,  $\text{tol-d}_8$ , 500 MHz, 298 K

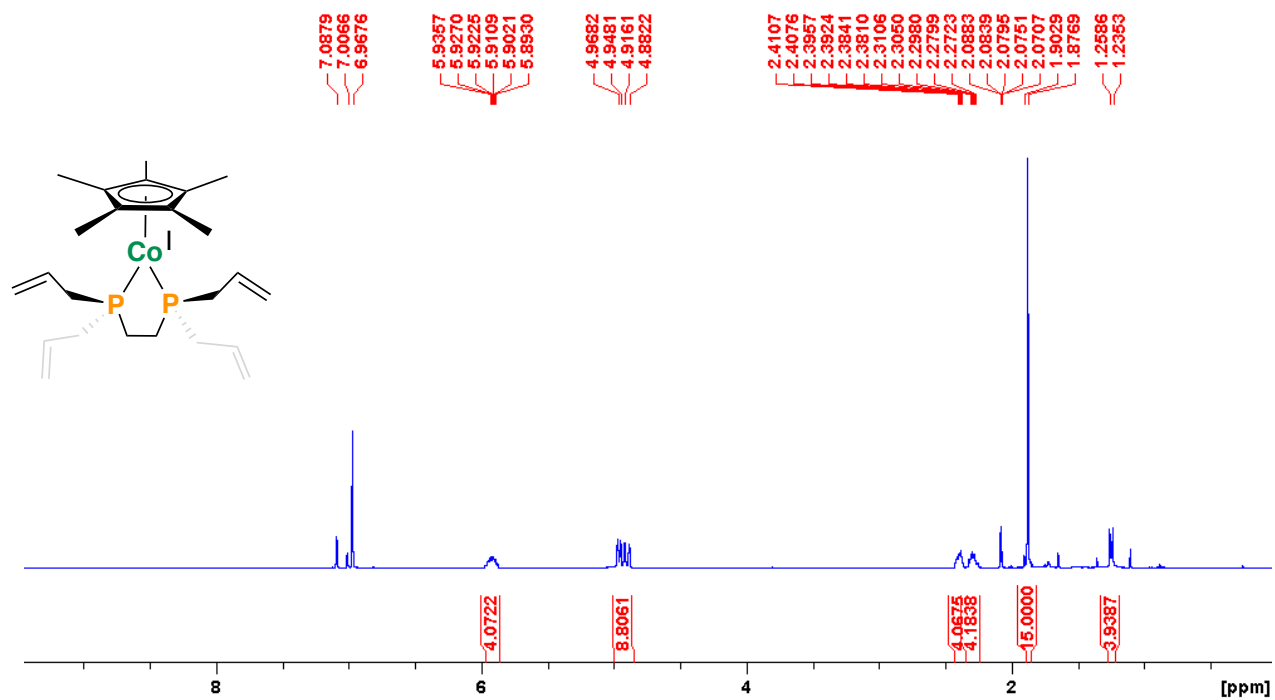

Figure S10. 2,  $^{31}\text{P}\{^1\text{H}\}$  NMR,  $\text{tol-d}_8$ , 203 MHz, 298 K

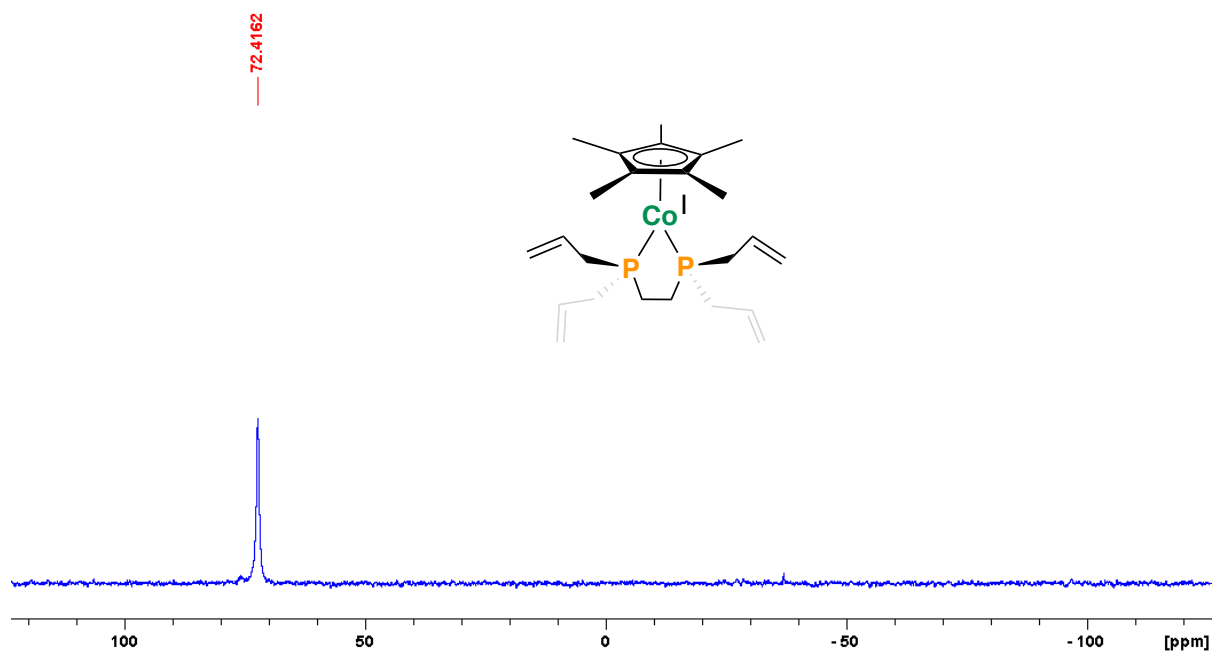

Figure S11. 2,  $^{13}\text{C}\{^1\text{H}\}$  NMR,  $\text{tol-d}_8$ , 125 MHz, 298 K

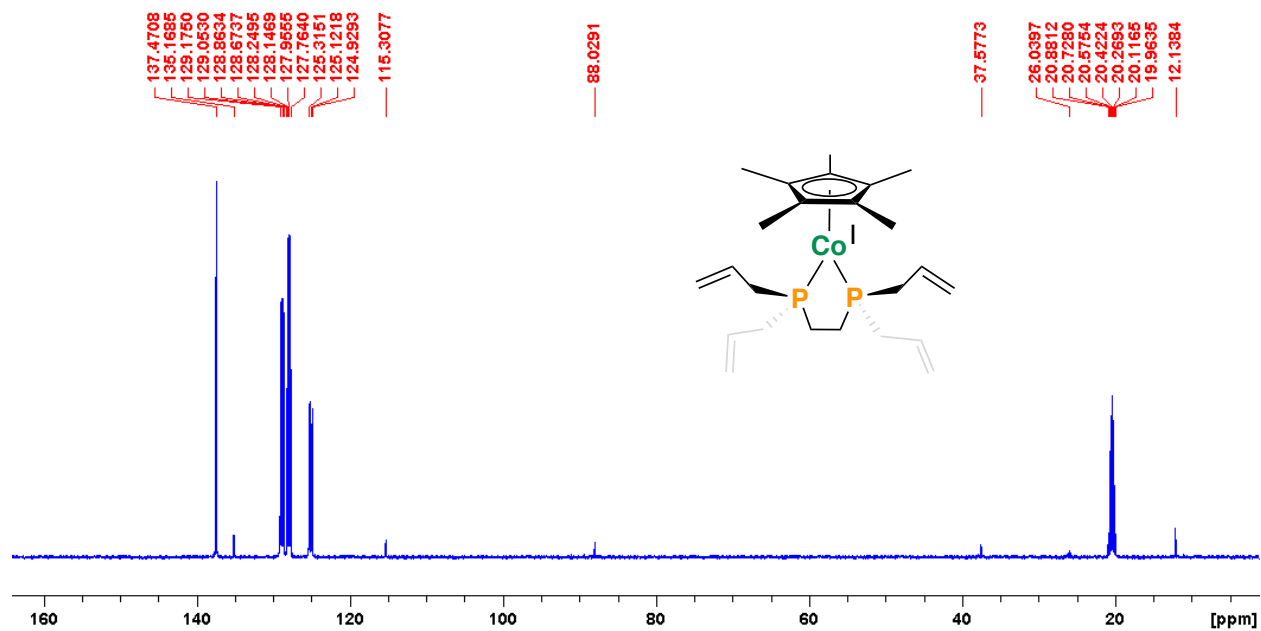

Figure S12.  $[\text{3}]\text{B}(\text{C}_6\text{F}_5)_4$ ,  $^1\text{H}$  NMR,  $\text{CDCl}_3$ , 500 MHz, 298 K (residual THF at 3.77 and 1.85 ppm)

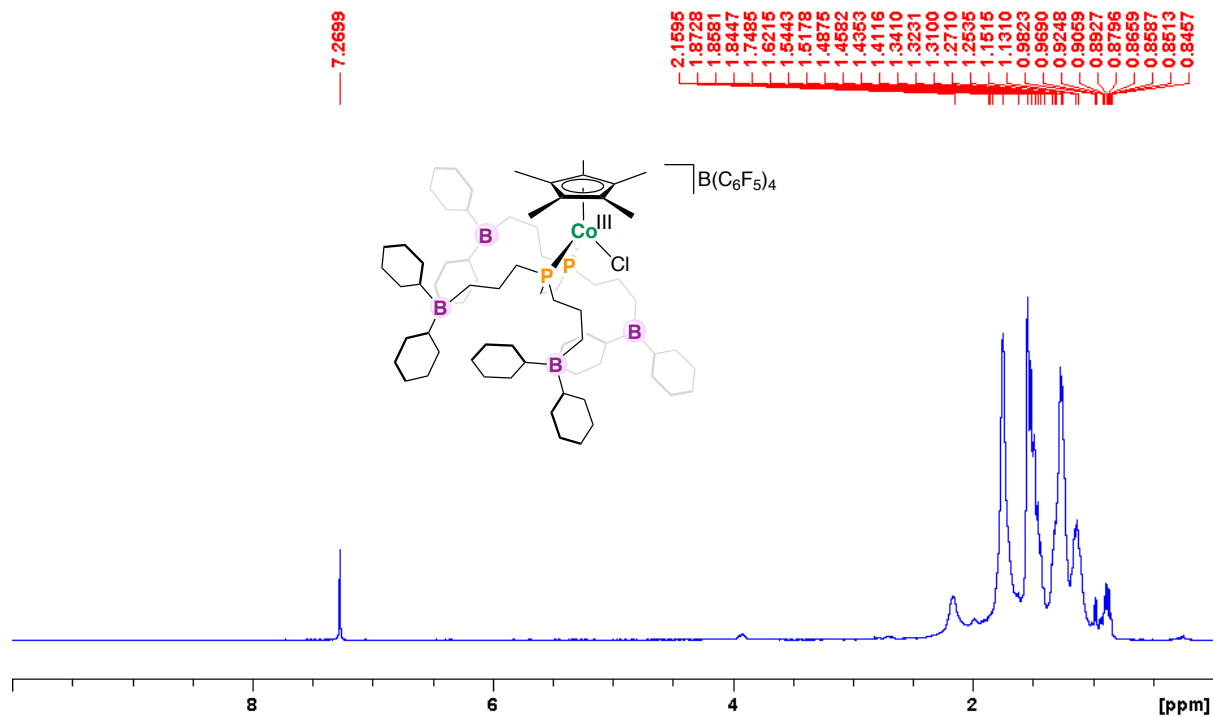



Figure S13.  $[3]B(C_6F_5)_4$ ,  $^{31}P\{^1H\}$  NMR,  $CDCl_3$ , 203 MHz, 298 K

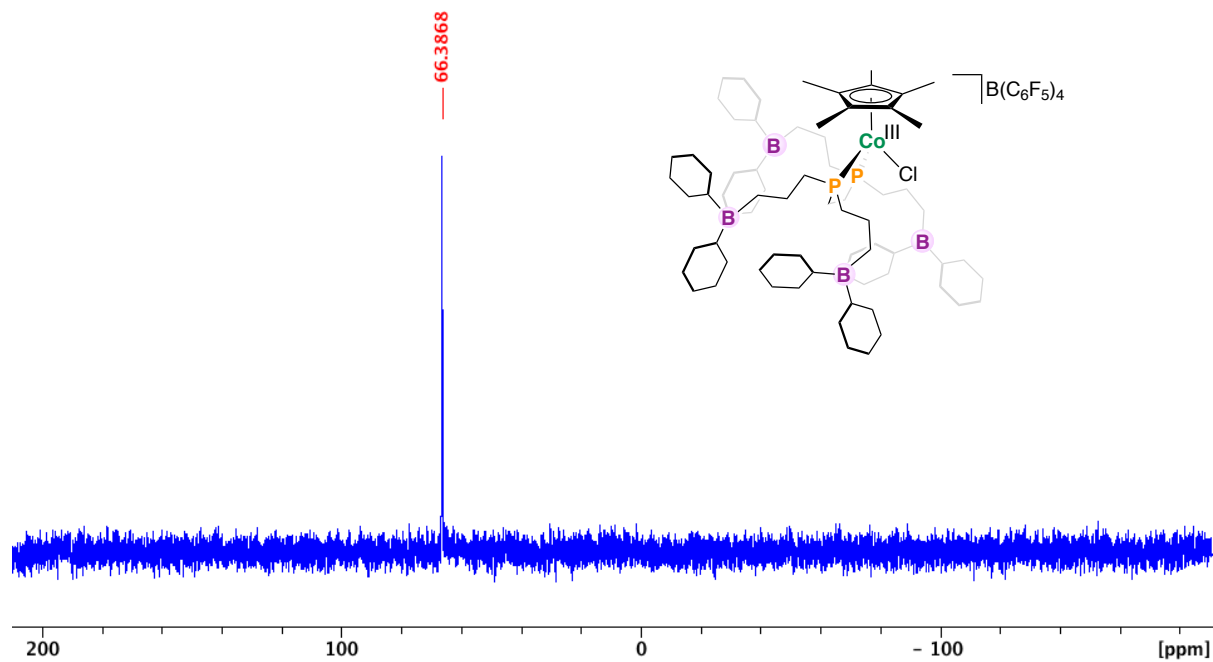

Figure S14.  $[3]B(C_6F_5)_4$ ,  $^{11}B\{^1H\}$  NMR,  $CDCl_3$ , 160.5 MHz, 298 K

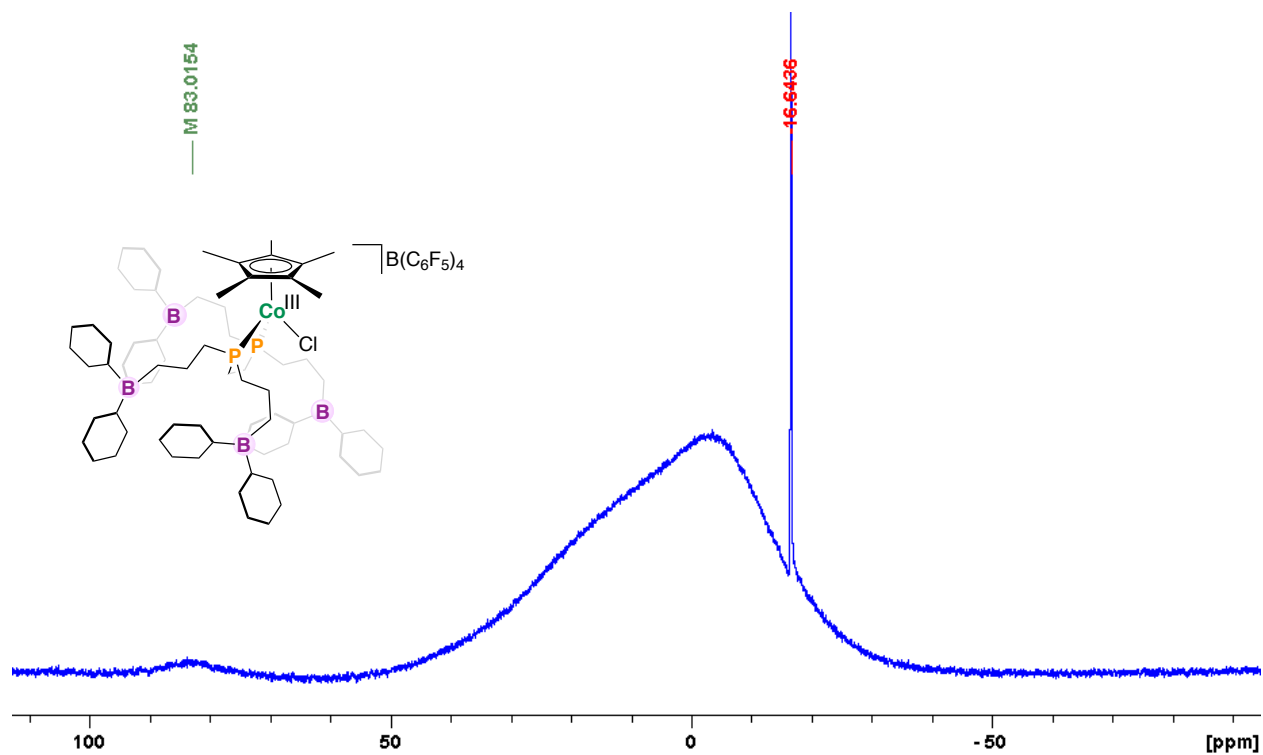

Figure S15.  $[3]B(C_6F_5)_4$ ,  $^{11}B\{^1H\}$  NMR, THF- $d_8$ , 160.5 MHz.

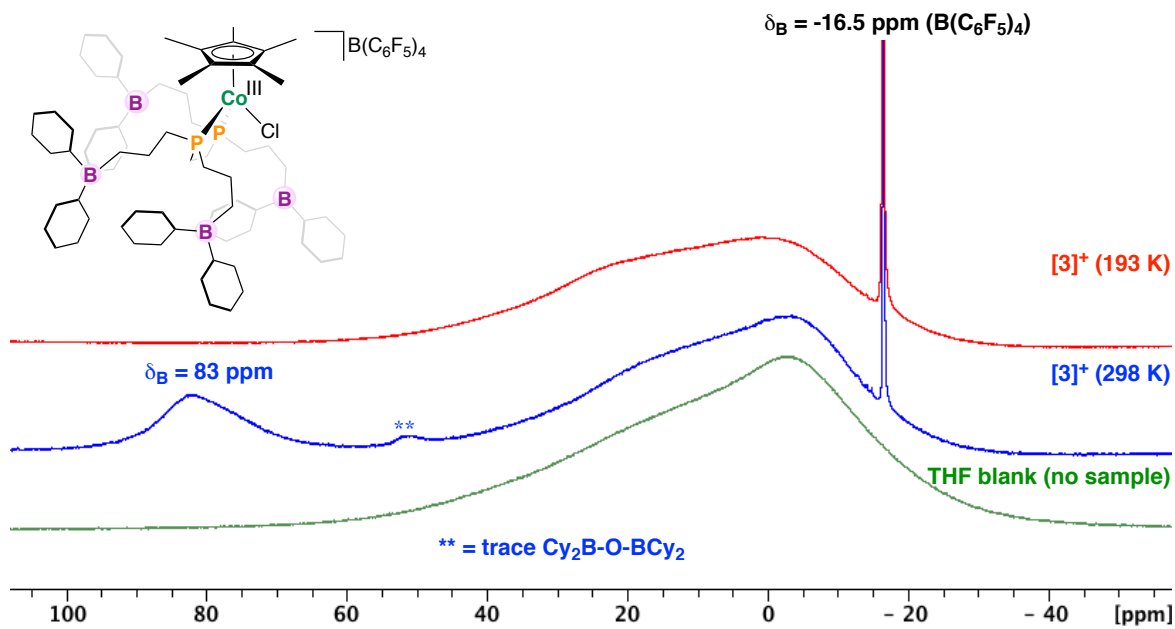

Figure S16.  $[3]B(C_6F_5)_4$ ,  $^{19}F\{^1H\}$  NMR,  $CDCl_3$ , 470 MHz, 298 K

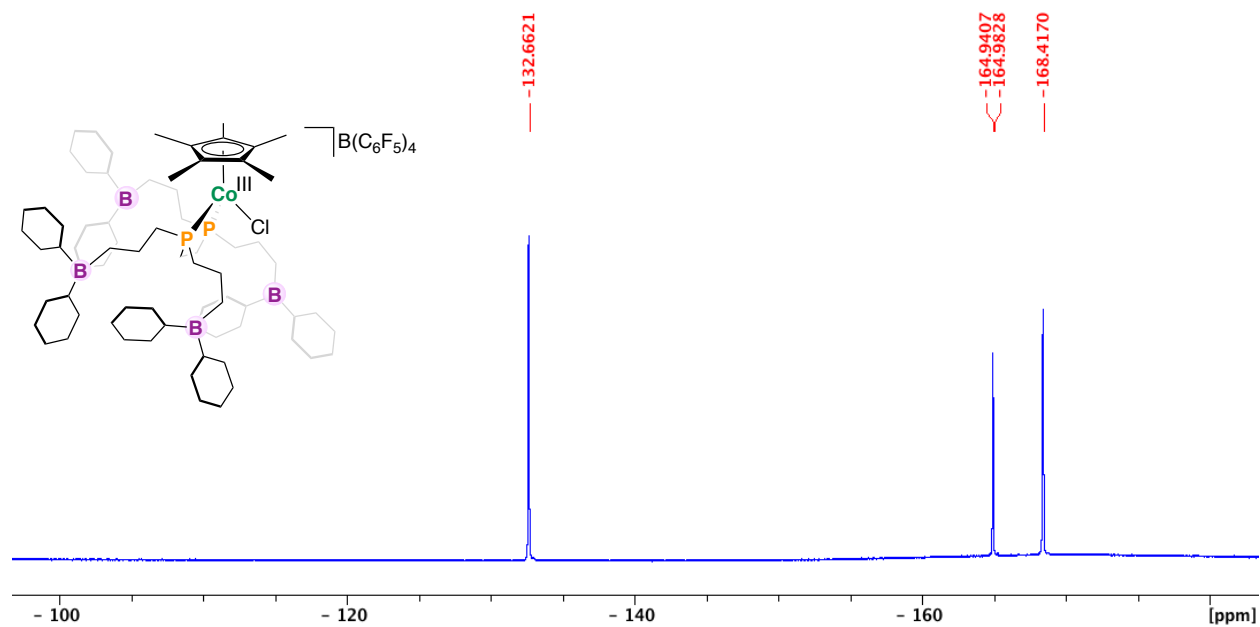

Figure S17.  $[3]B(C_6F_5)_4$ ,  $^{13}C\{^1H\}$  NMR,  $CDCl_3$ , 125 MHz, 298 K

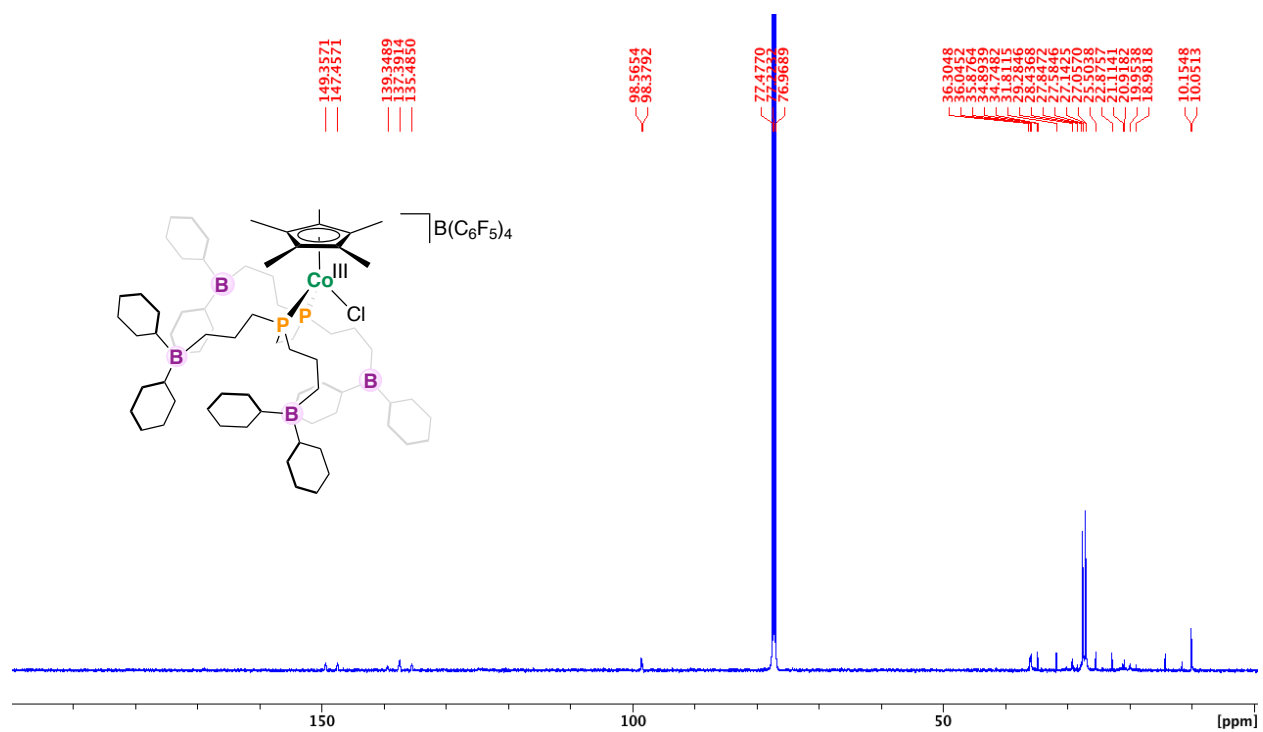

Figure S18.  $4$ ,  $^1H$  NMR,  $tol-d_8$ , 500 MHz, 298 K

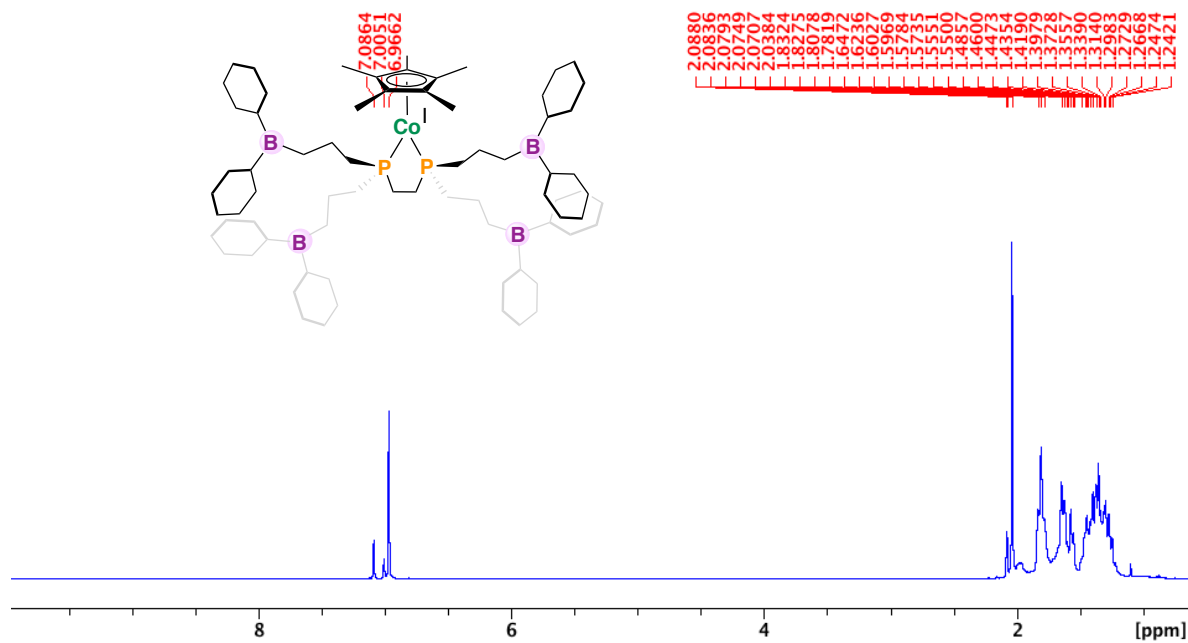

Figure S19. 4,  $^{31}\text{P}\{^1\text{H}\}$  NMR,  $\text{tol-d}_8$ , 203 MHz, 298 K

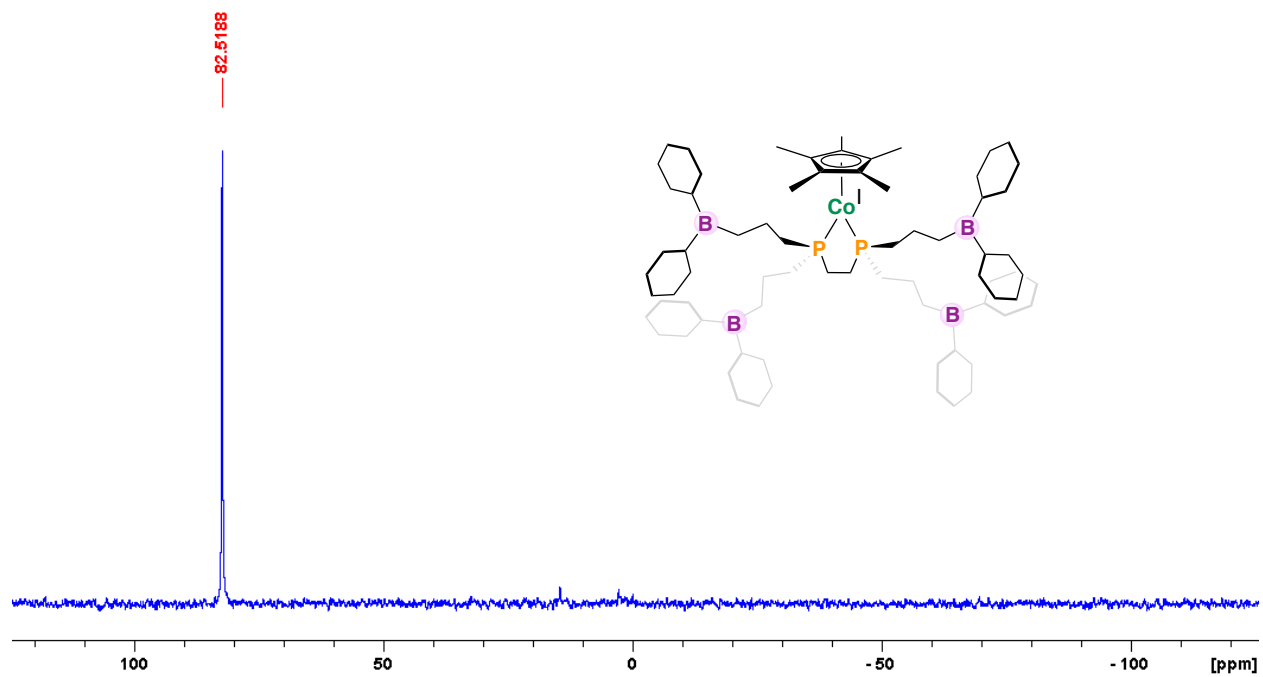

Figure S20. 4,  $^{11}\text{B}\{^1\text{H}\}$  NMR,  $\text{C}_6\text{D}_6$ , 160.5 MHz, 298 K

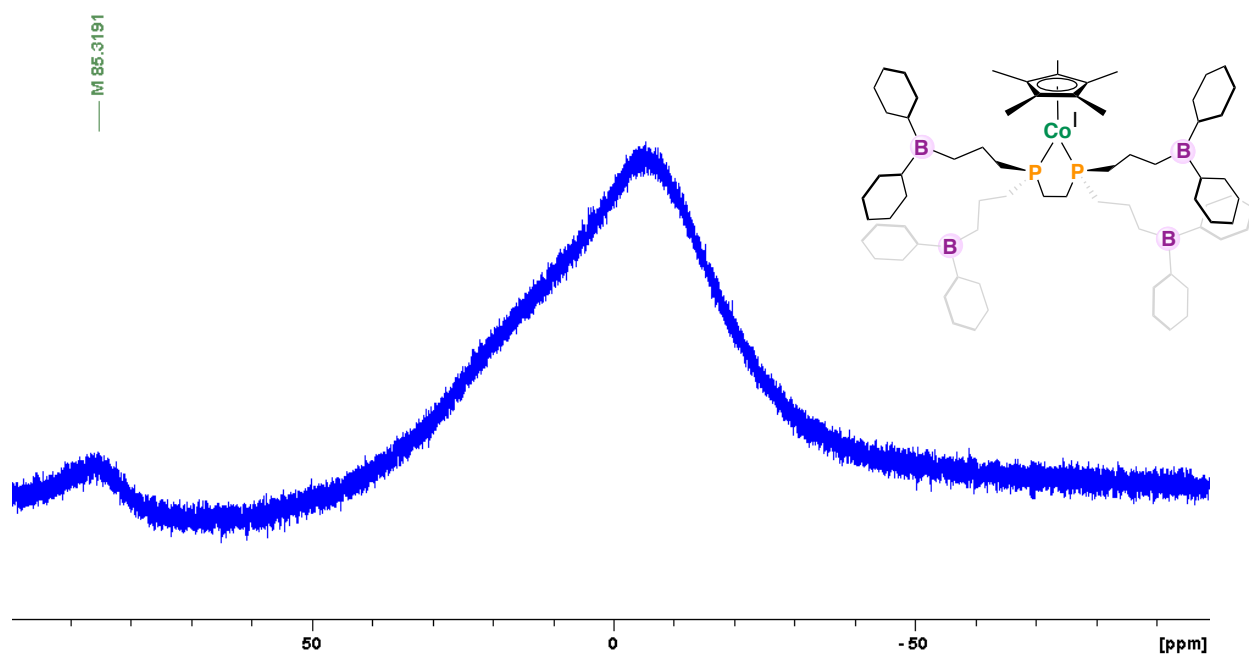

Figure S21. 4,  $^{11}\text{B}\{^1\text{H}\}$  NMR, THF- $d_8$ , 160.5 MHz.

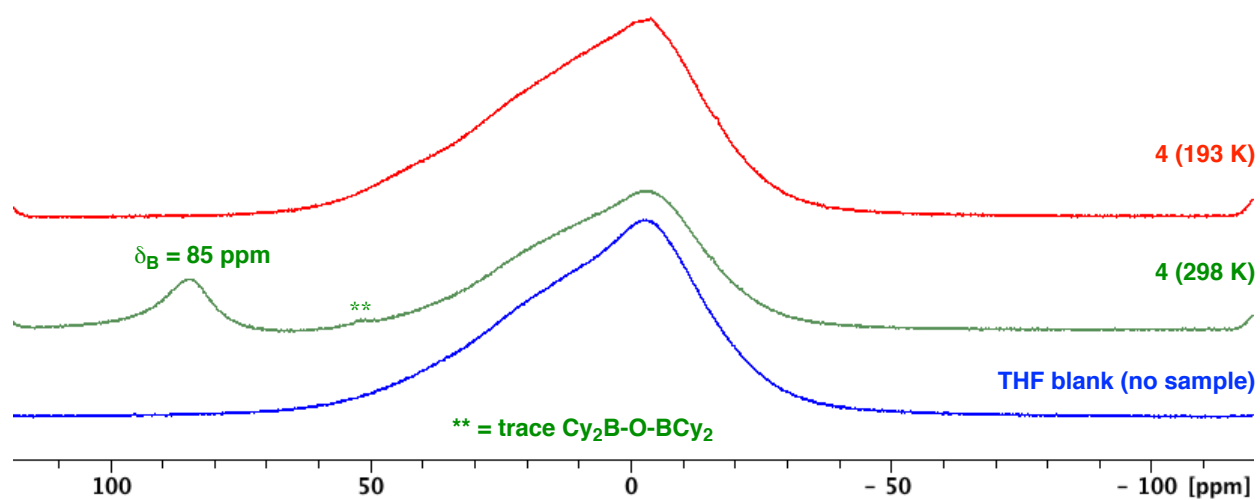

Figure S22. 4,  $^{13}\text{C}\{^1\text{H}\}$  NMR,  $\text{C}_6\text{D}_6$ , 125 MHz, 298 K

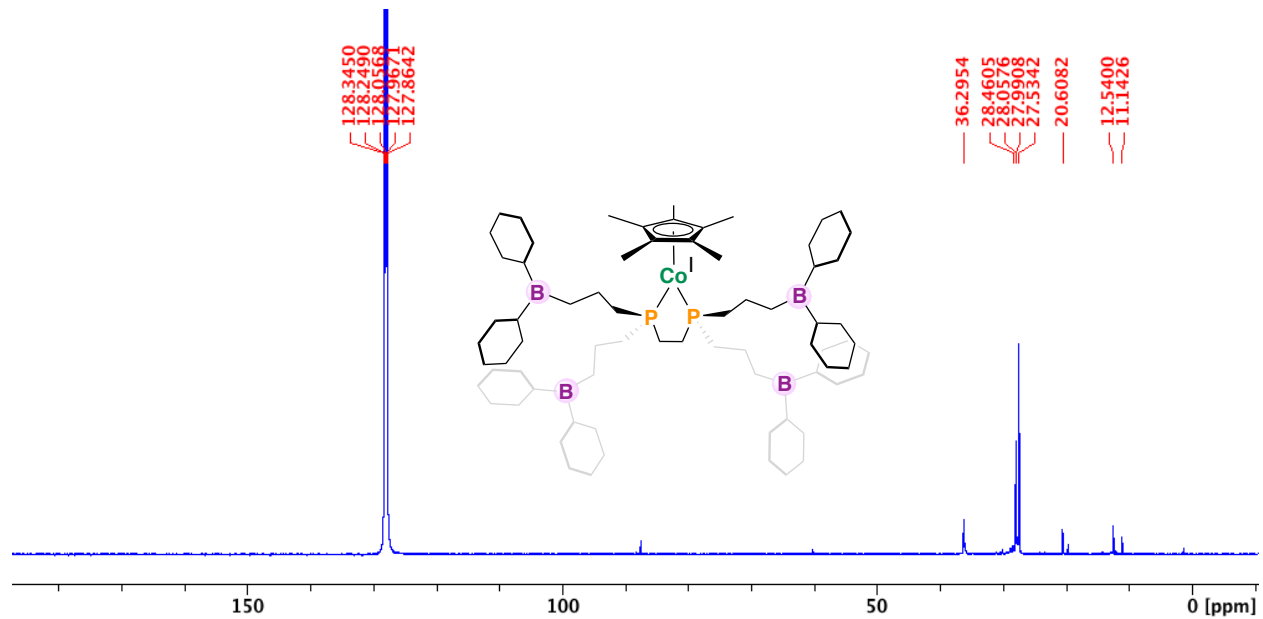

**Figure S23.** [5]BPh<sub>4</sub>, <sup>1</sup>H NMR, THF-d<sub>8</sub>, 500 MHz, 298 K (inset shows Co<sup>III</sup>-H signal at δ<sub>H</sub> = -16.8 ppm)

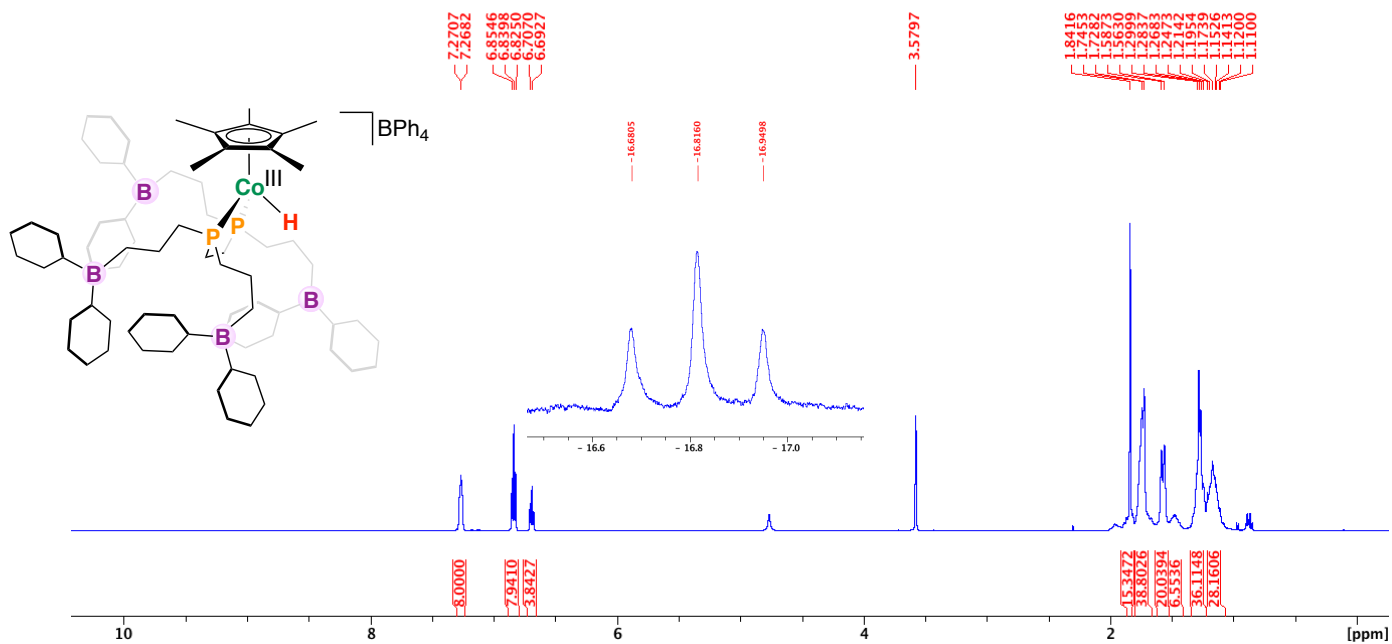

**Figure S24.** [5]BPh<sub>4</sub>, <sup>31</sup>P{<sup>1</sup>H} NMR, THF-d<sub>8</sub>, 203 MHz, 298 K

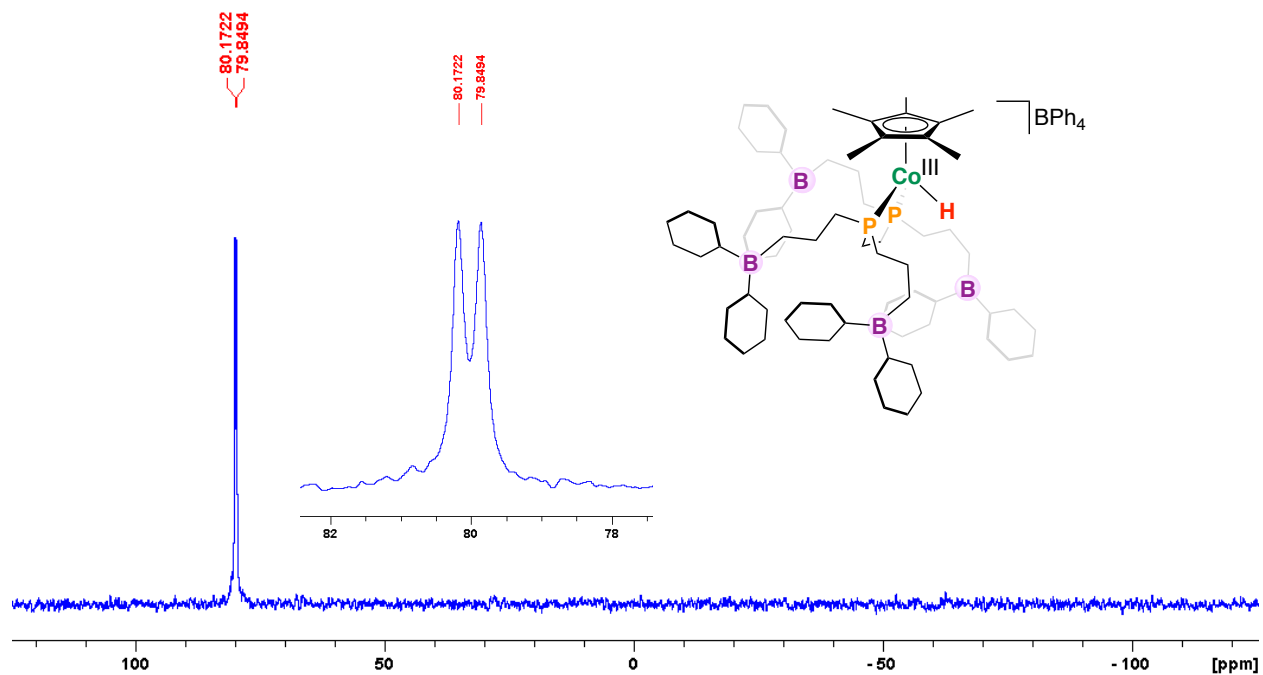

Figure S25. [5]BPh<sub>4</sub>, <sup>11</sup>B{<sup>1</sup>H} NMR, THF-d<sub>8</sub>, 160.5 MHz, 298 K.

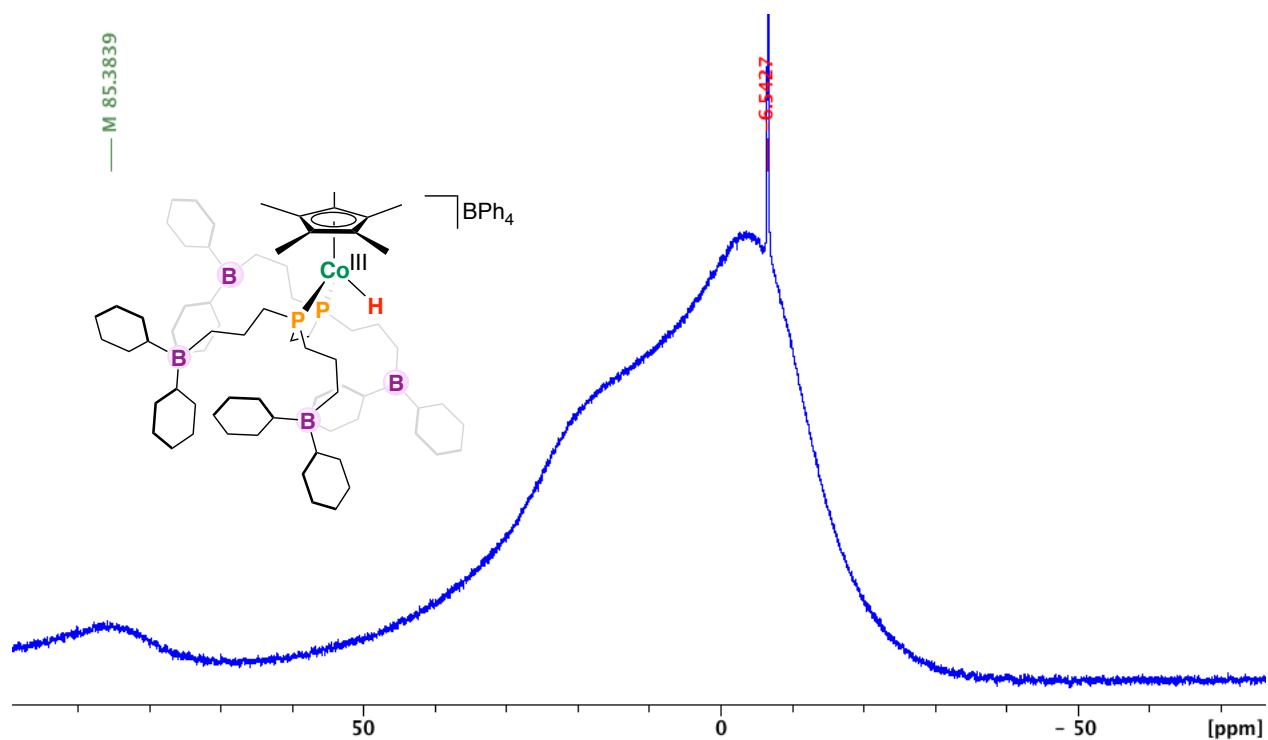

Figure S26. [5]BPh<sub>4</sub>, Variable Temperature <sup>11</sup>B{<sup>1</sup>H} NMR, THF-d<sub>8</sub>, 160.5 MHz.

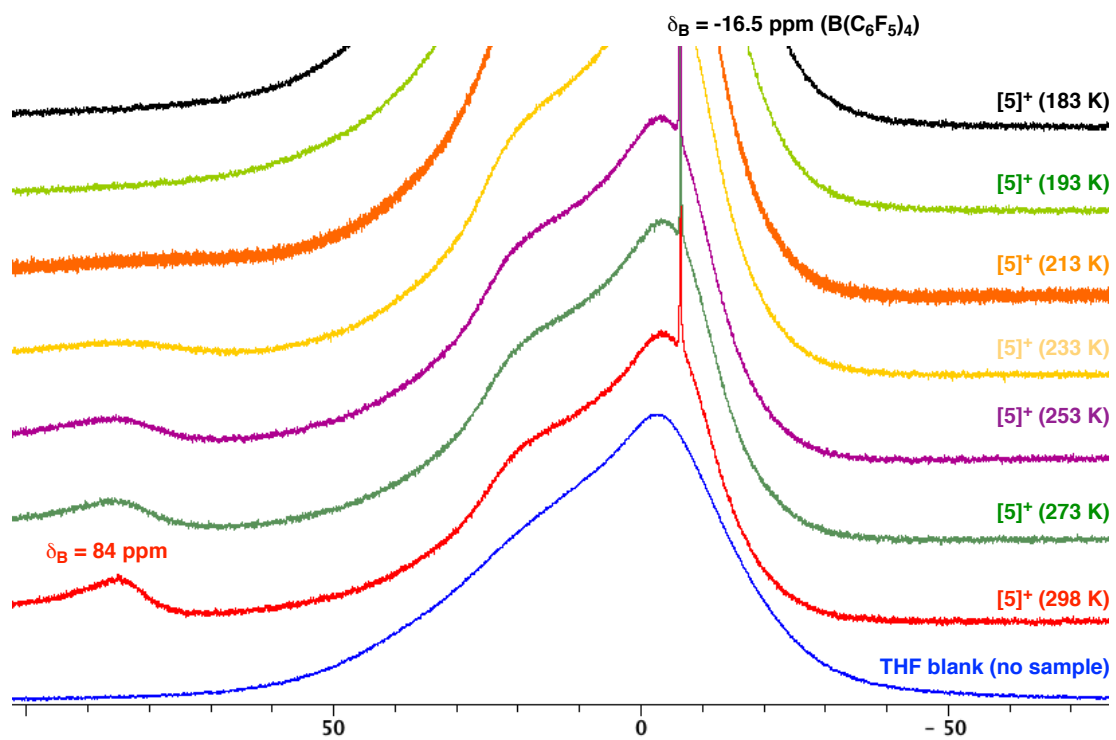

Figure S27. [5]BPh<sub>4</sub>, <sup>13</sup>C{<sup>1</sup>H} NMR, THF-d<sub>8</sub>, 125 MHz, 298 K

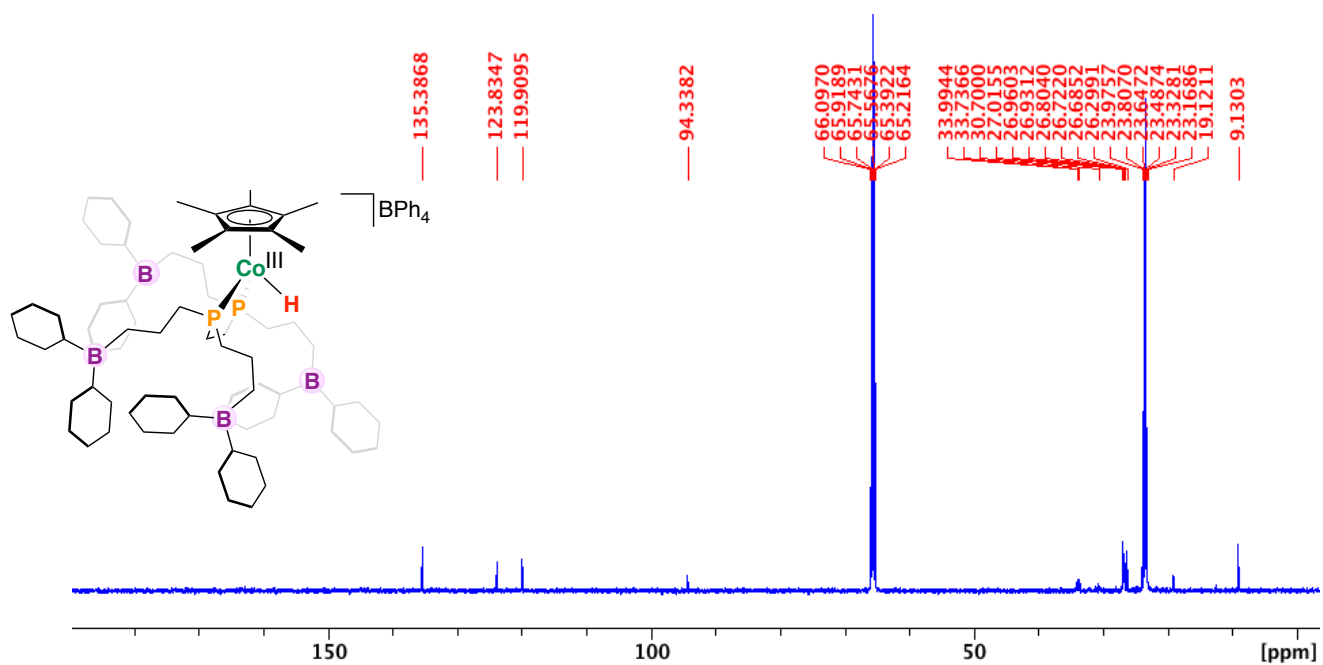

Figure S28. [5]BPh<sub>4</sub>, Variable Temperature <sup>1</sup>H NMR, THF-d<sub>8</sub>, 500 MHz.

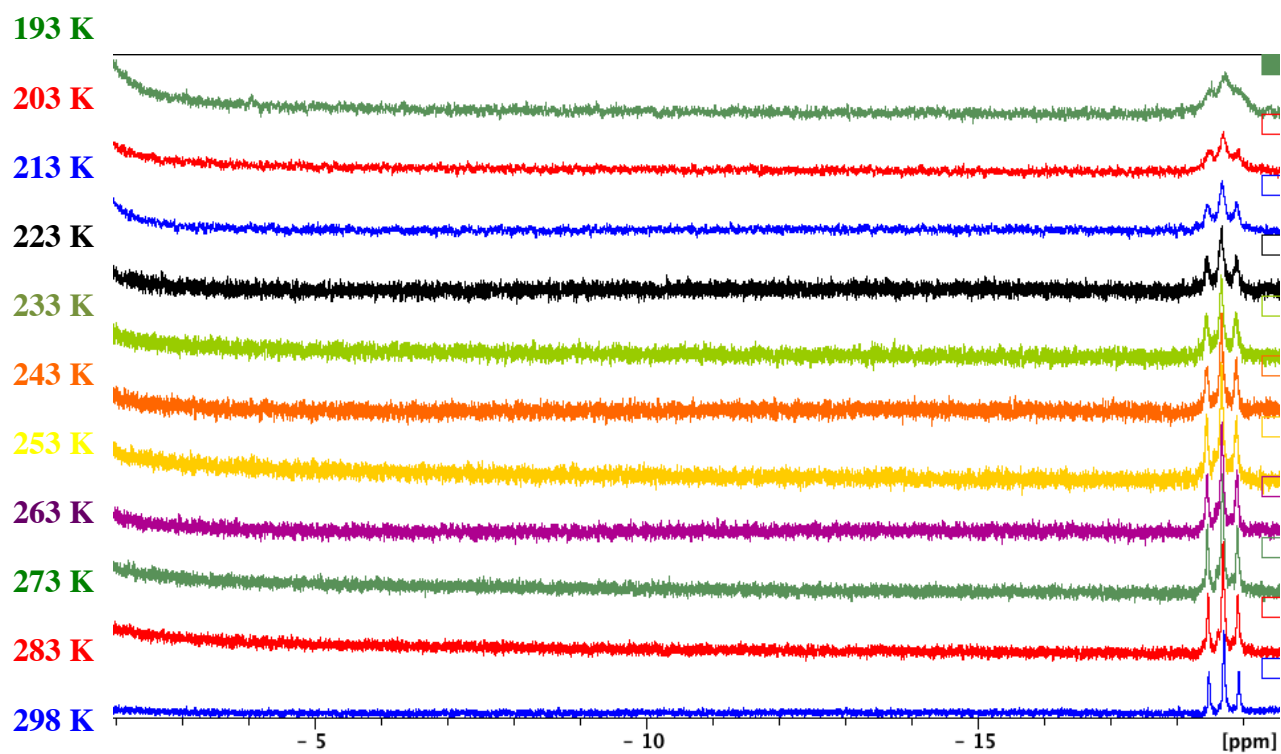



Figure S29. [5]BPh<sub>4</sub>, Variable Temperature <sup>31</sup>P{<sup>1</sup>H} NMR, THF-d<sub>8</sub>, 203 MHz.

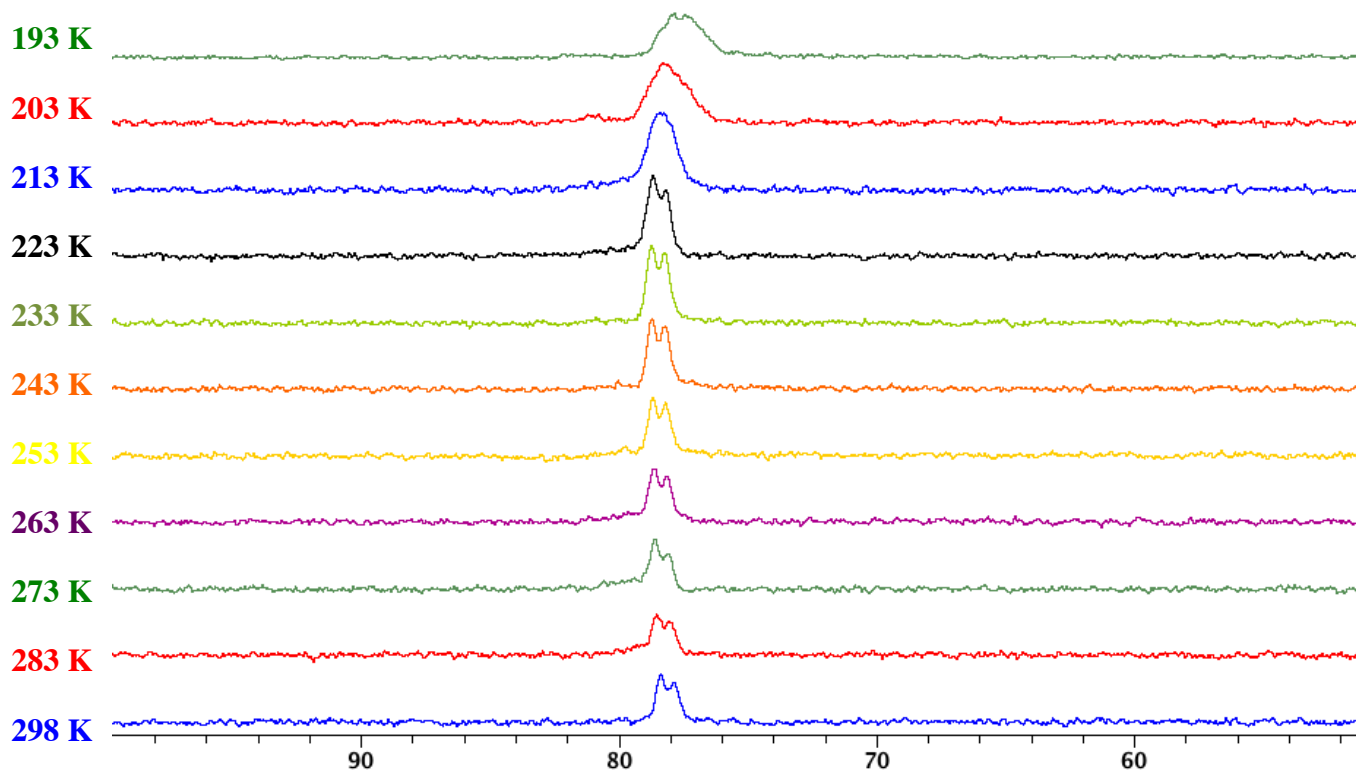

Figure S30. [6]BPh<sub>4</sub>, <sup>1</sup>H NMR, THF-d<sub>8</sub>, 500 MHz, 298 K

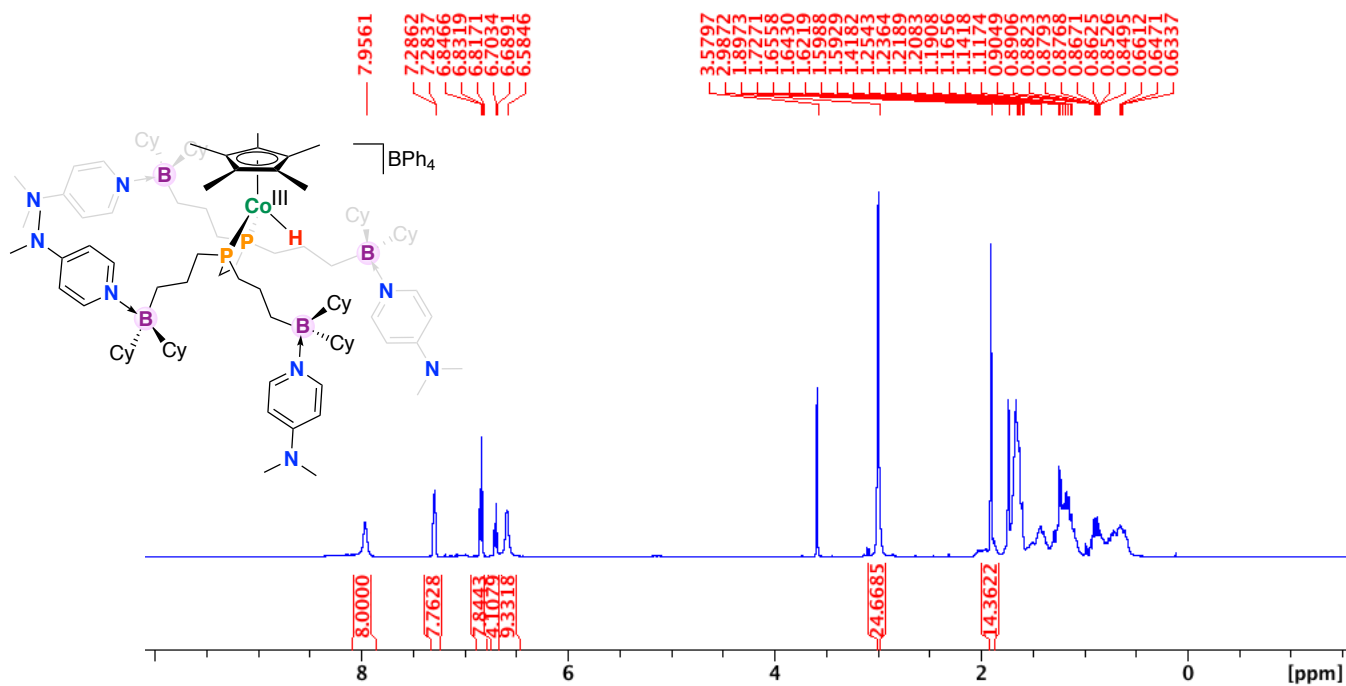

Figure S31. [6]BPh<sub>4</sub>, a) <sup>1</sup>H NMR and b) <sup>1</sup>H{<sup>31</sup>P} NMR, THF-d<sub>8</sub>, 500 MHz, 298 K

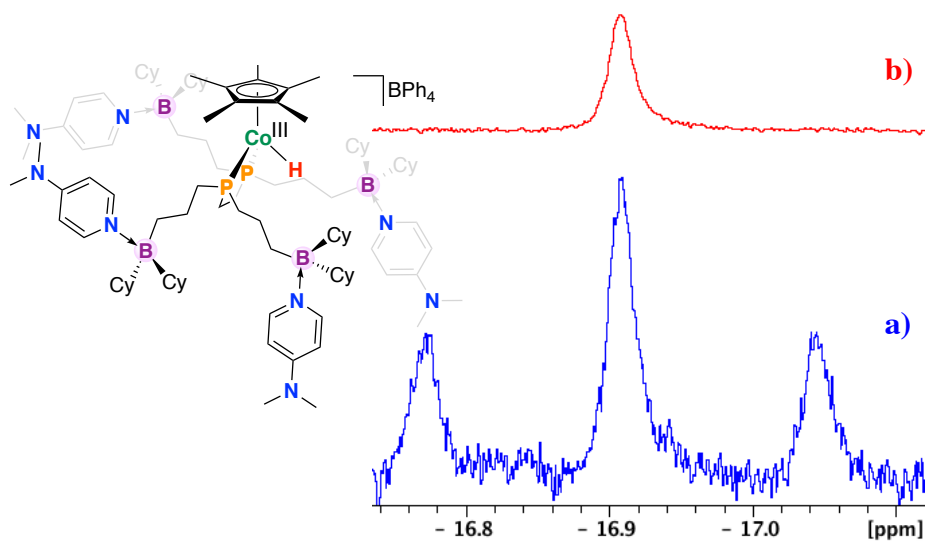

Figure S32. [6]BPh<sub>4</sub>, <sup>31</sup>P{<sup>1</sup>H} NMR, THF-d<sub>8</sub>, 203 MHz, 298 K

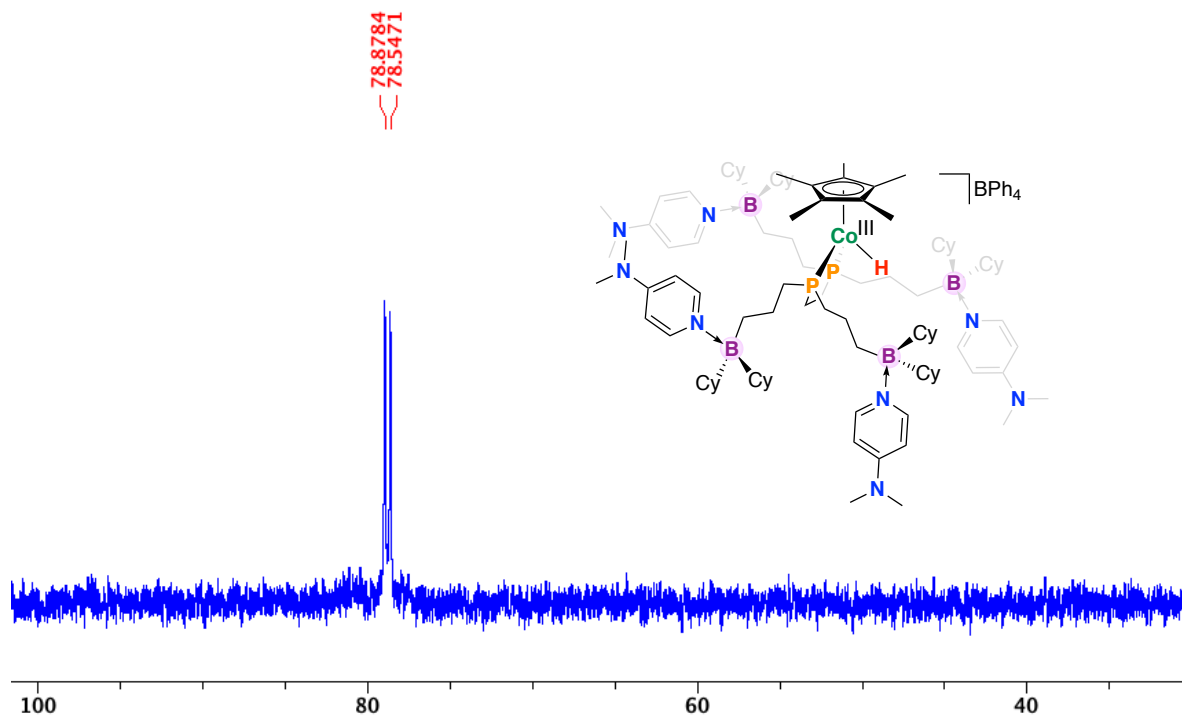

Figure S33. [6]BPh<sub>4</sub>, <sup>11</sup>B{<sup>1</sup>H} NMR, THF-d<sub>8</sub>, 160.5 MHz.

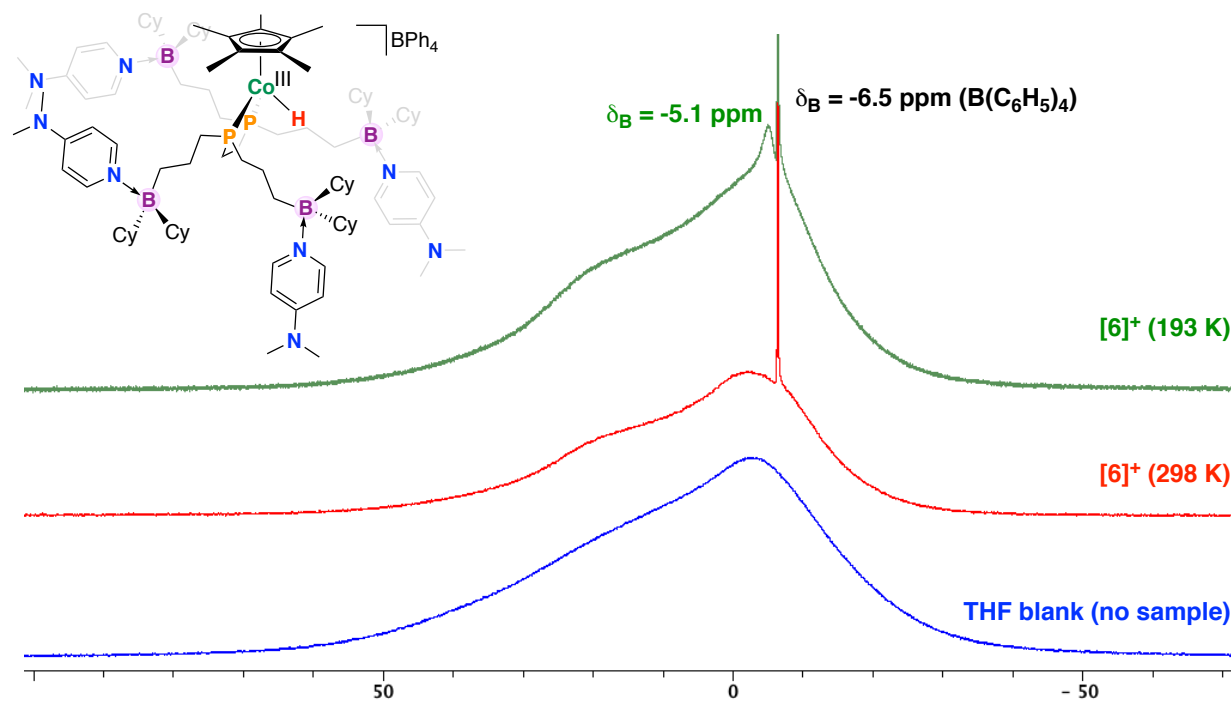

Figure S34. 7, <sup>1</sup>H NMR, THF-d<sub>8</sub>, 500 MHz, 298 K

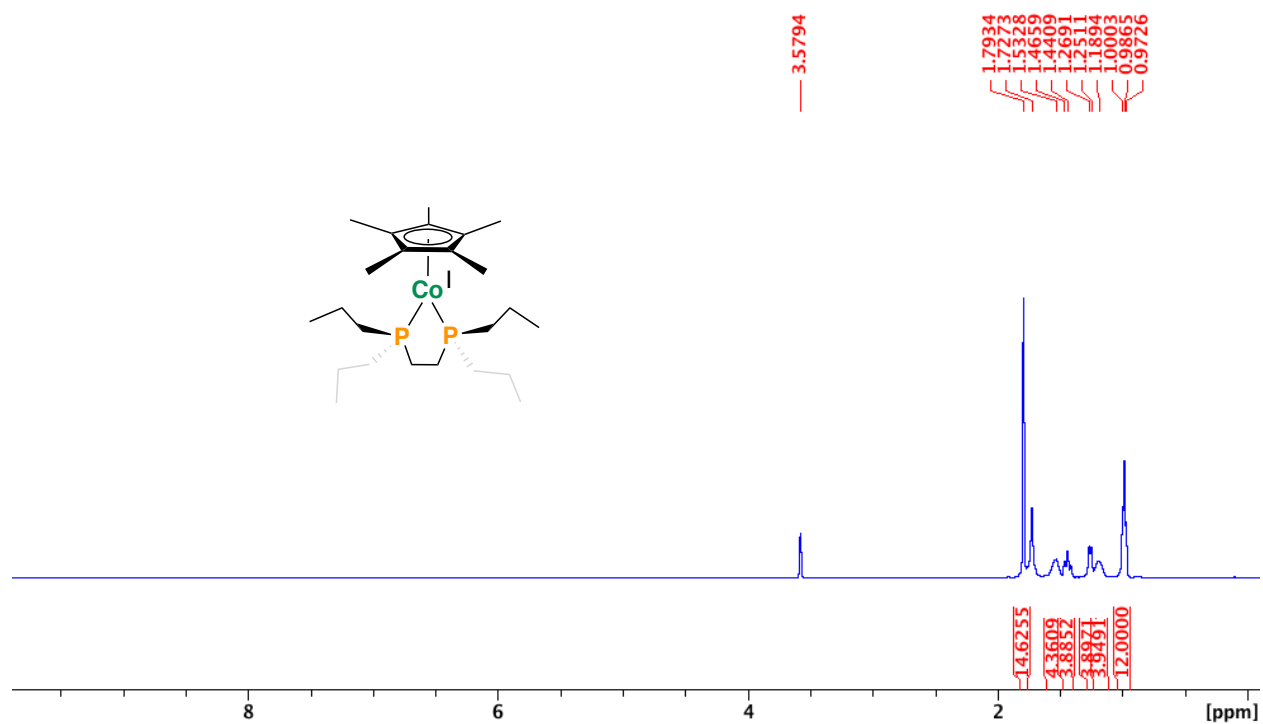

Figure S35. 7,  $^{31}\text{P}\{^1\text{H}\}$  NMR, THF- $d_8$ , 203 MHz, 298 K

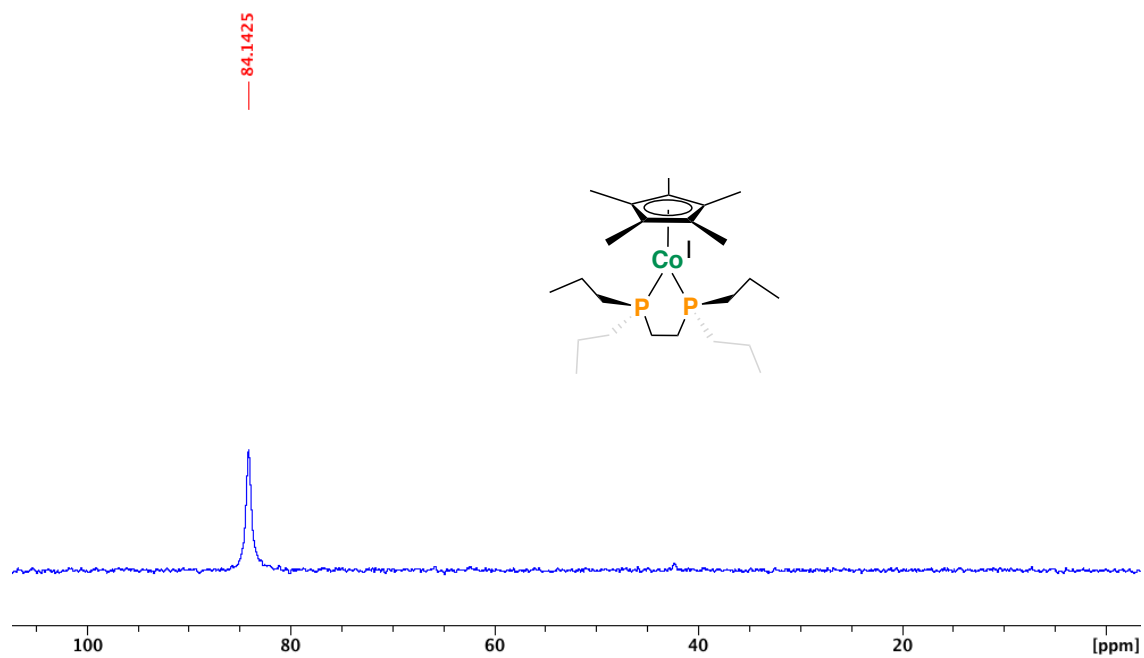

Figure S36. [5]BPh $_4$ ,  $^{13}\text{C}\{^1\text{H}\}$  NMR, THF- $d_8$ , 125 MHz, 298 K

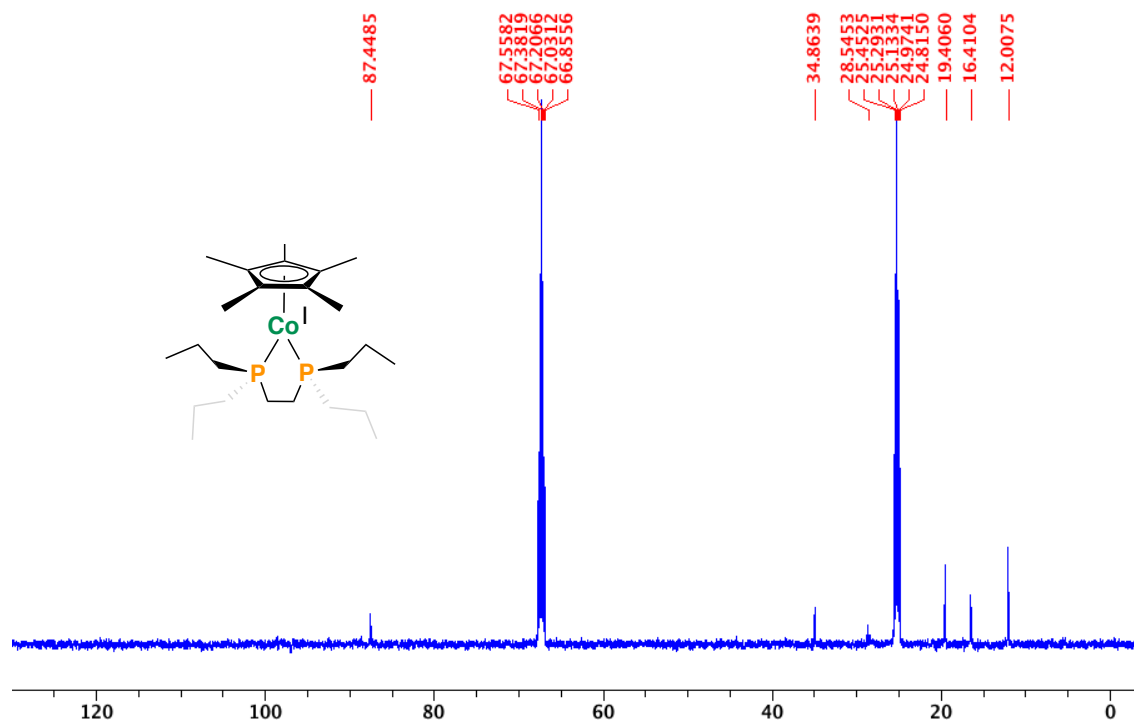

Figure S37. [8]BPh<sub>4</sub>, <sup>1</sup>H NMR, THF-d<sub>8</sub>, 500 MHz, 298 K (inset shows hydride resonance)

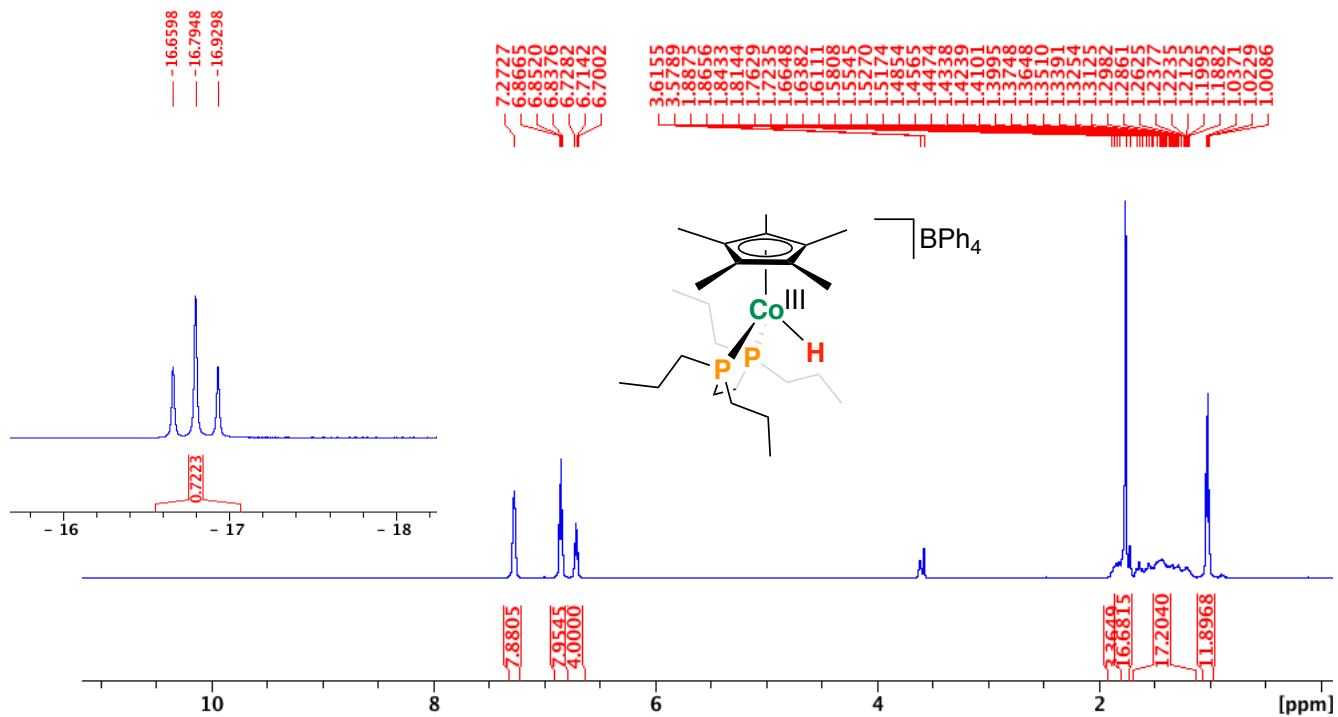

Figure S38. [8]BPh<sub>4</sub>, a) <sup>1</sup>H NMR and b) <sup>1</sup>H{<sup>31</sup>P} NMR, THF-d<sub>8</sub>, 500 MHz, 298 K

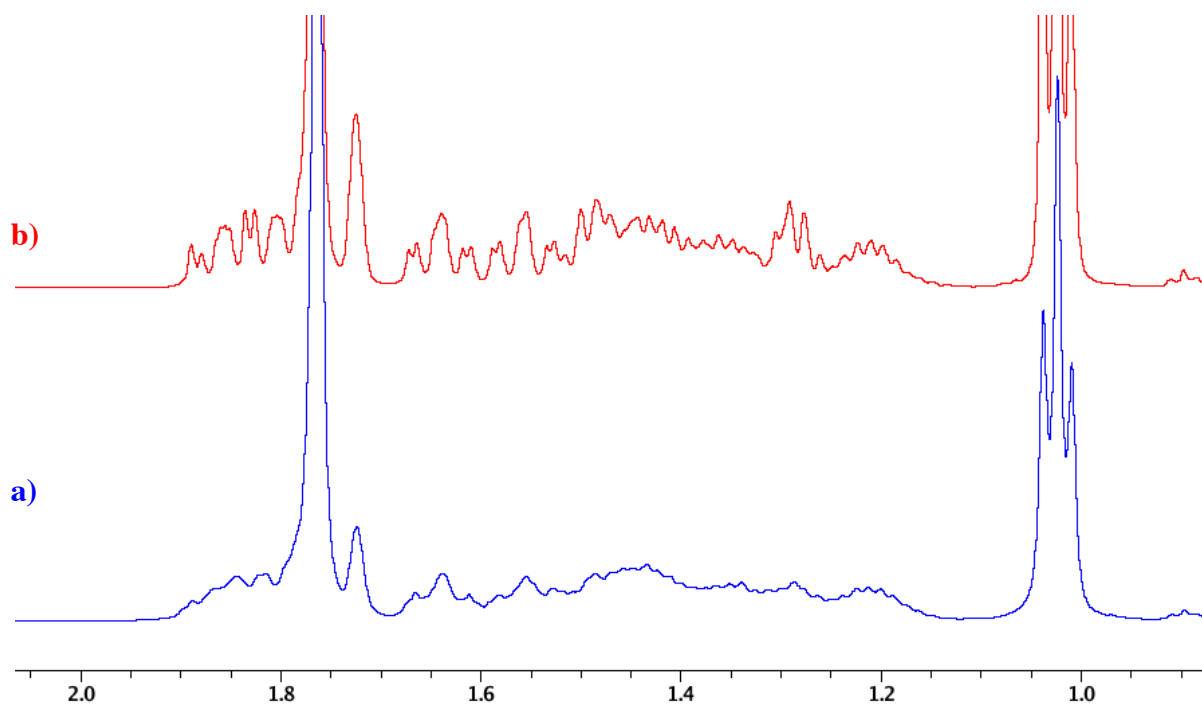

Figure S39. [8]BPh<sub>4</sub>, <sup>31</sup>P{<sup>1</sup>H} NMR, THF-d<sub>8</sub>, 203 MHz, 298 K

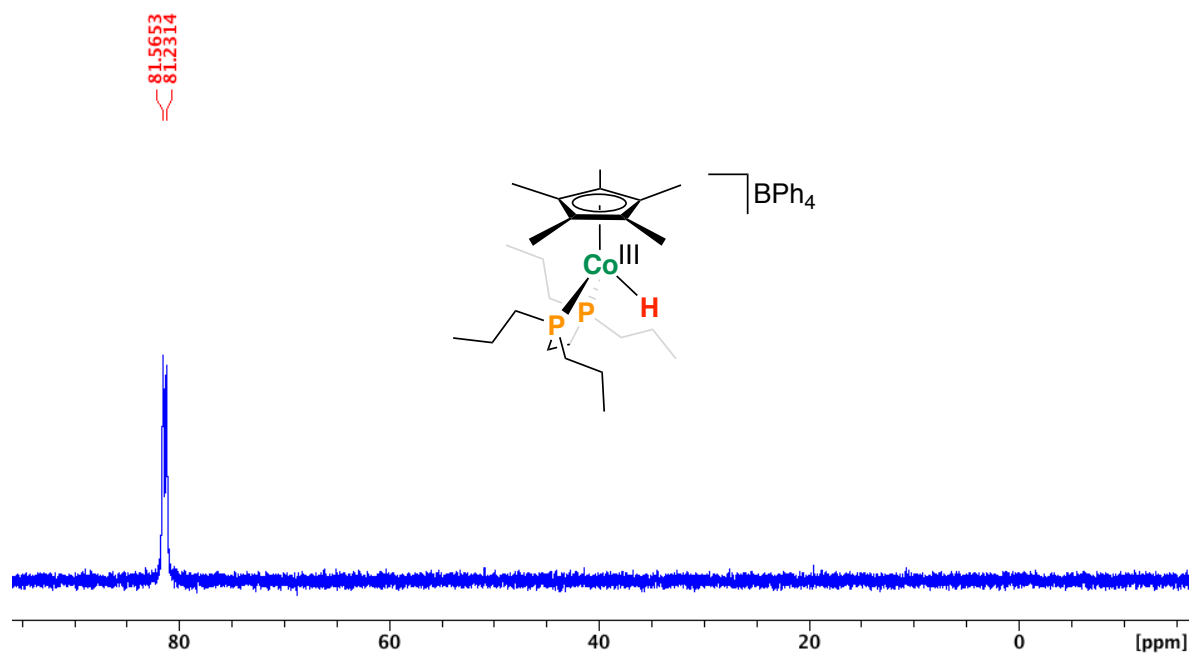

Figure S40. [8]BPh<sub>4</sub>, <sup>11</sup>B{<sup>1</sup>H} NMR, THF-d<sub>8</sub>, 160.5 MHz, 298 K.

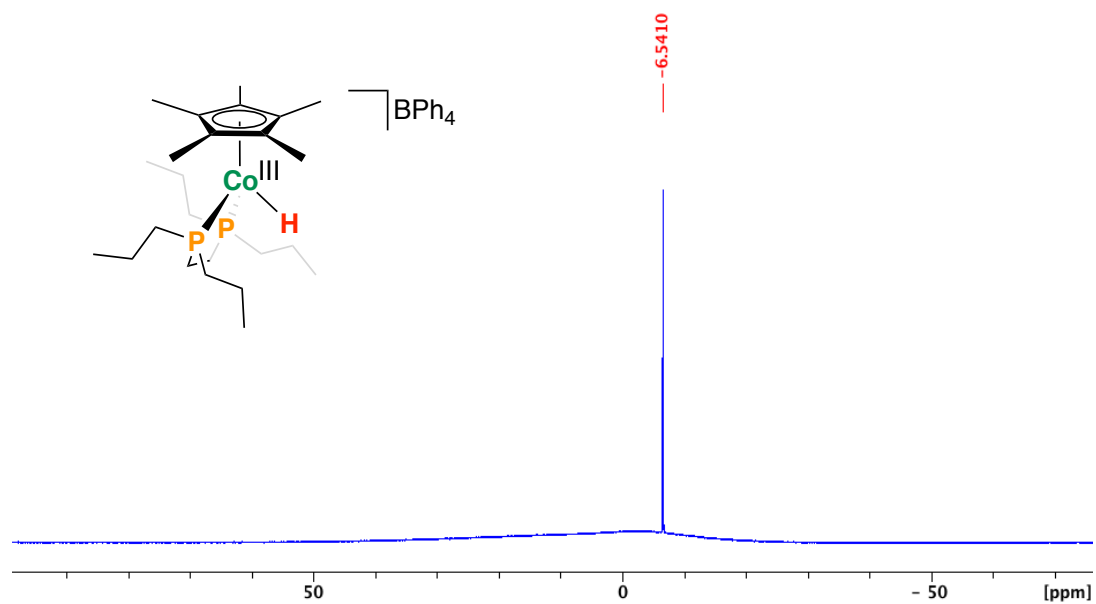

Figure S41. [8]BPh<sub>4</sub>, <sup>13</sup>C{<sup>1</sup>H} NMR, THF-d<sub>8</sub>, 125 MHz, 298 K

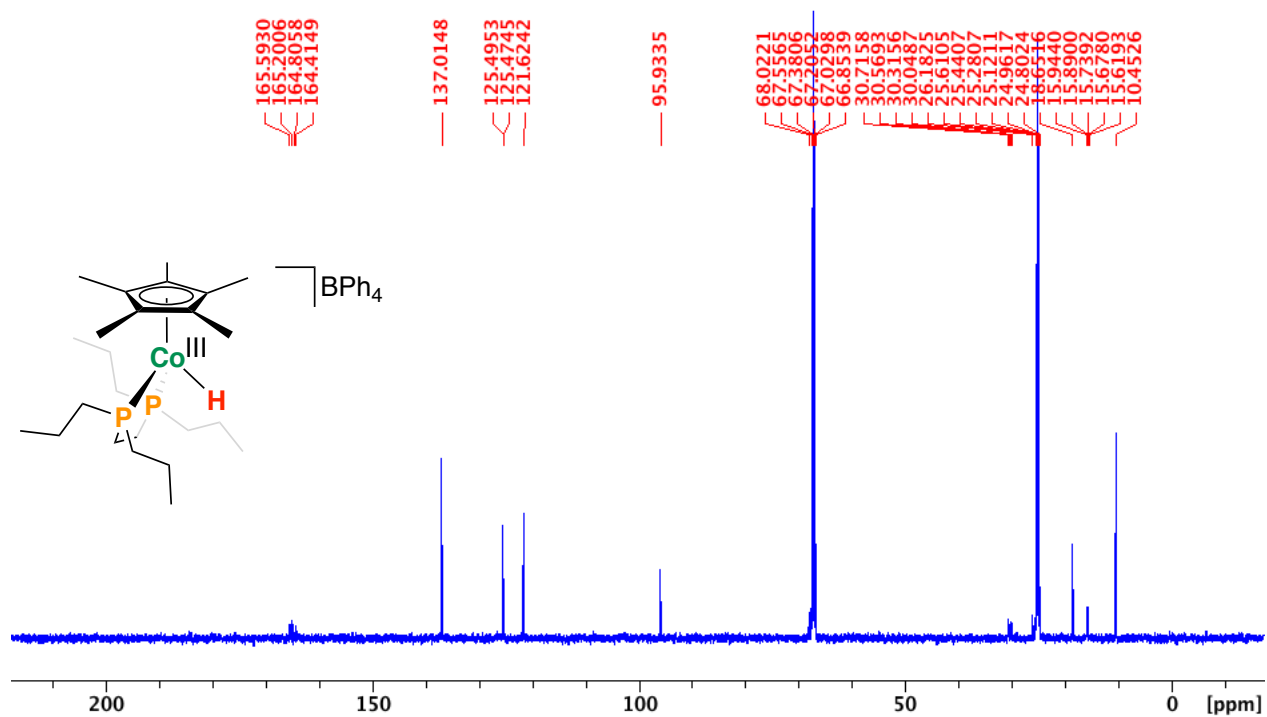

Figure S42. [9]B(C<sub>6</sub>F<sub>5</sub>)<sub>4</sub>, <sup>1</sup>H NMR, THF-d<sub>8</sub>, 500 MHz, 298 K

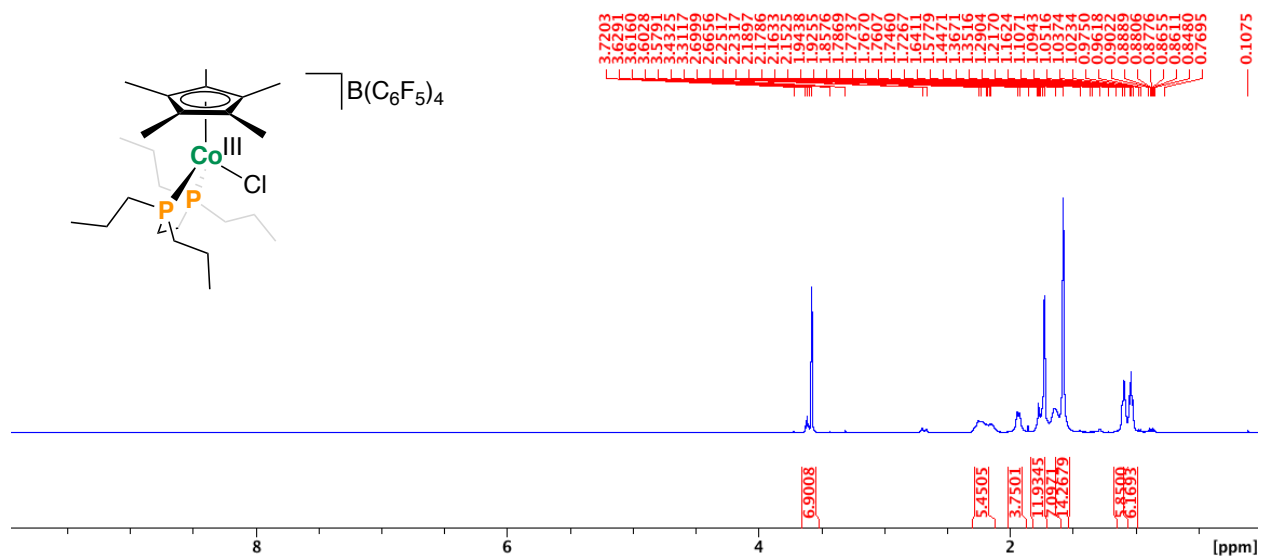

Figure S43.  $[9]B(C_6F_5)_4$ ,  $^{31}P\{^1H\}$  NMR, THF- $d_8$ , 203 MHz, 298 K

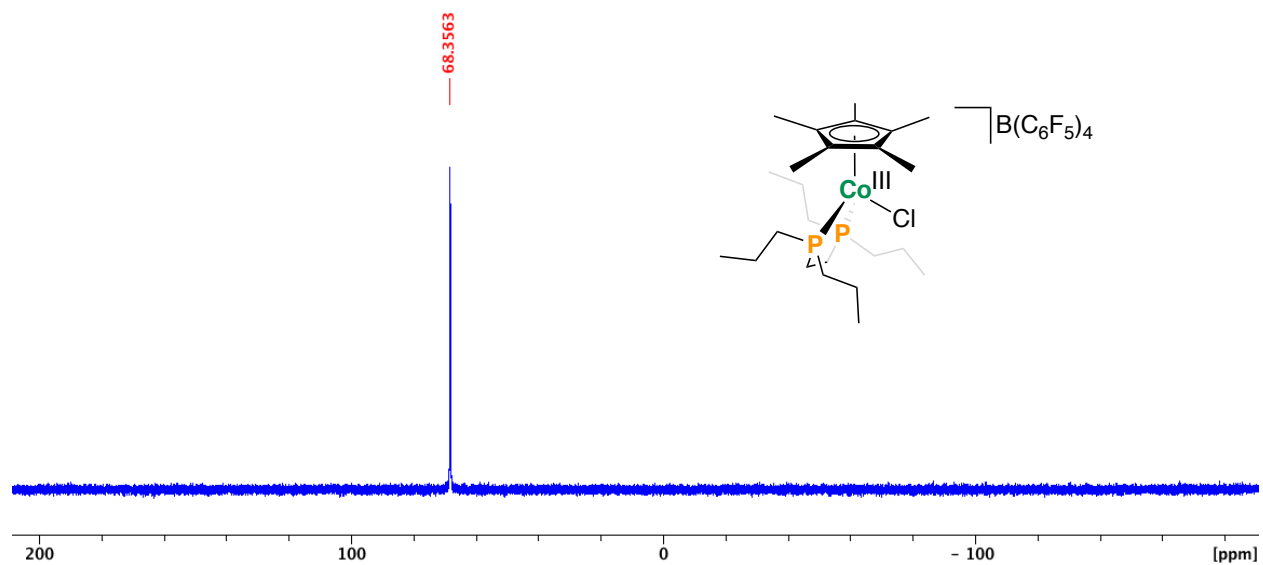

Figure S44.  $[9]B(C_6F_5)_4$ ,  $^{11}B\{^1H\}$  NMR, THF- $d_8$ , 160.5 MHz, 298 K.

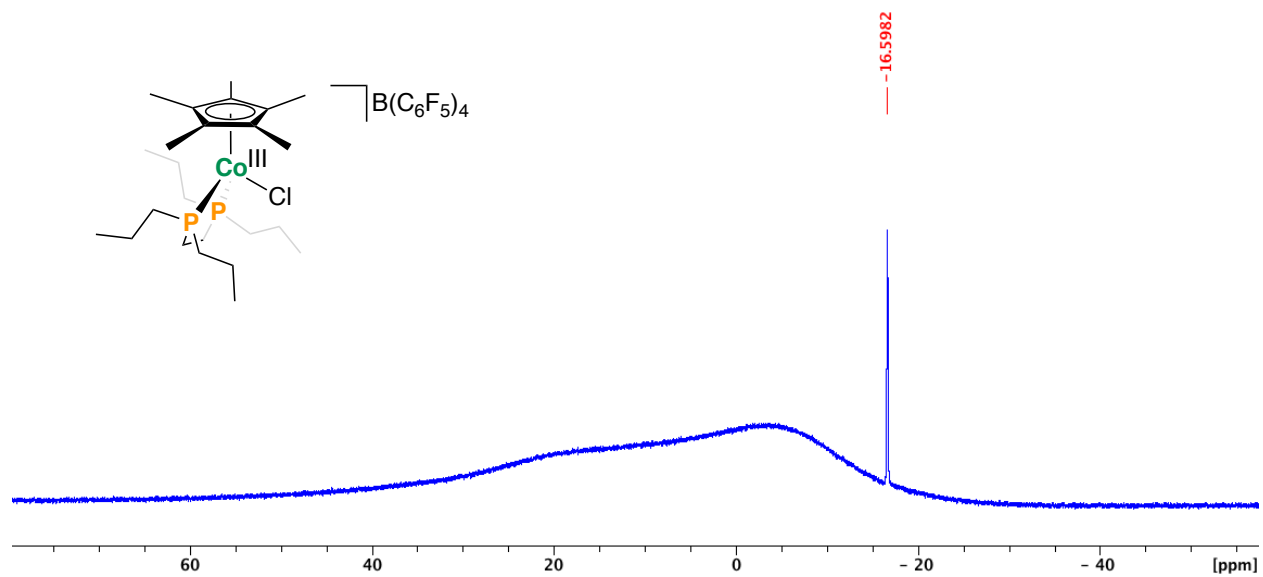





**Figure S47.** Crude  $^1\text{H}$  NMR for treatment of **4** with **a)** benzoic acid and **b)** 4-pyridylbenzoic acid, THF- $d_8$ , 500 MHz, 298 K.

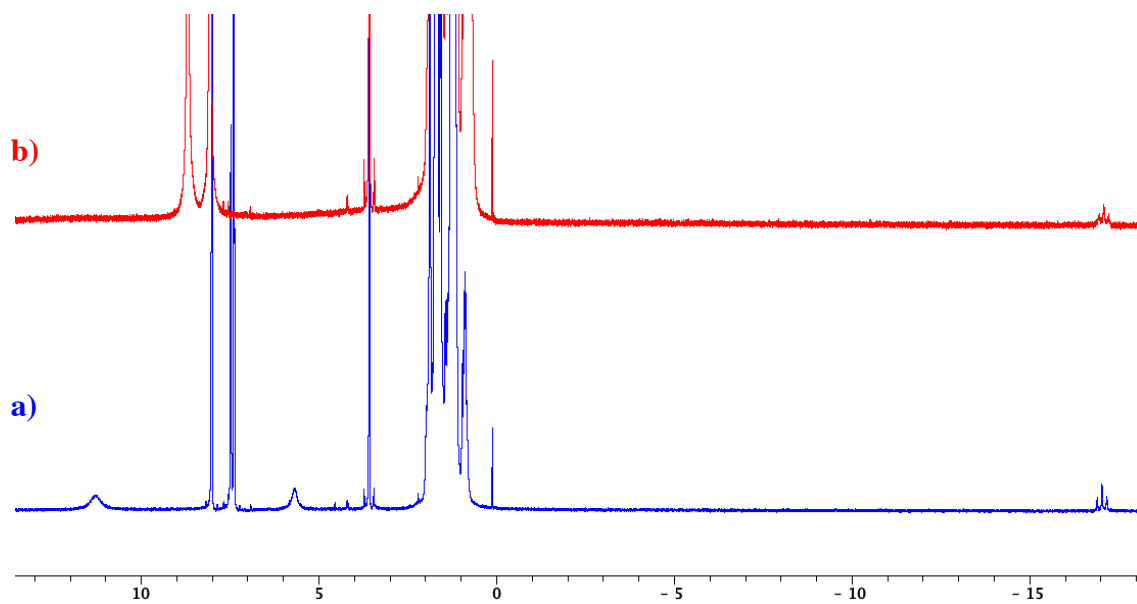

**Figure S48.** Crude  $^1\text{H}$  NMR (expansion) for treatment of **4** with 4 equivalents of **a)** benzoic acid or **b)** 4-pyridylbenzoic acid, THF- $d_8$ , 500 MHz, 298 K.

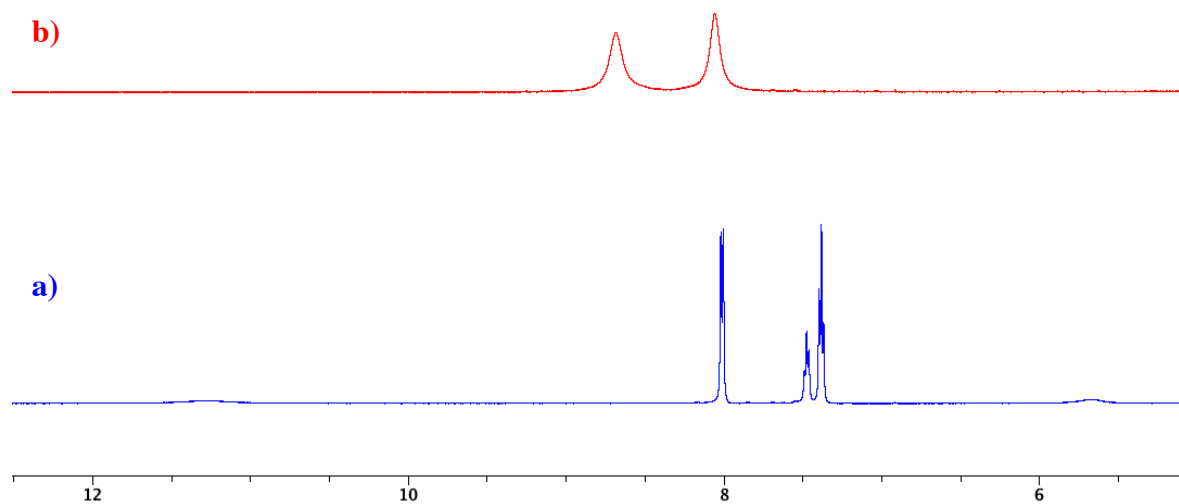

**Figure S49.** Crude  $^1\text{H}$  NMR (expansion) for treatment of **4** with 4 equivalents of **a)** benzoic acid or **b)** 4-pyridylbenzoic acid, THF- $d_8$ , 500 MHz, 298 K.

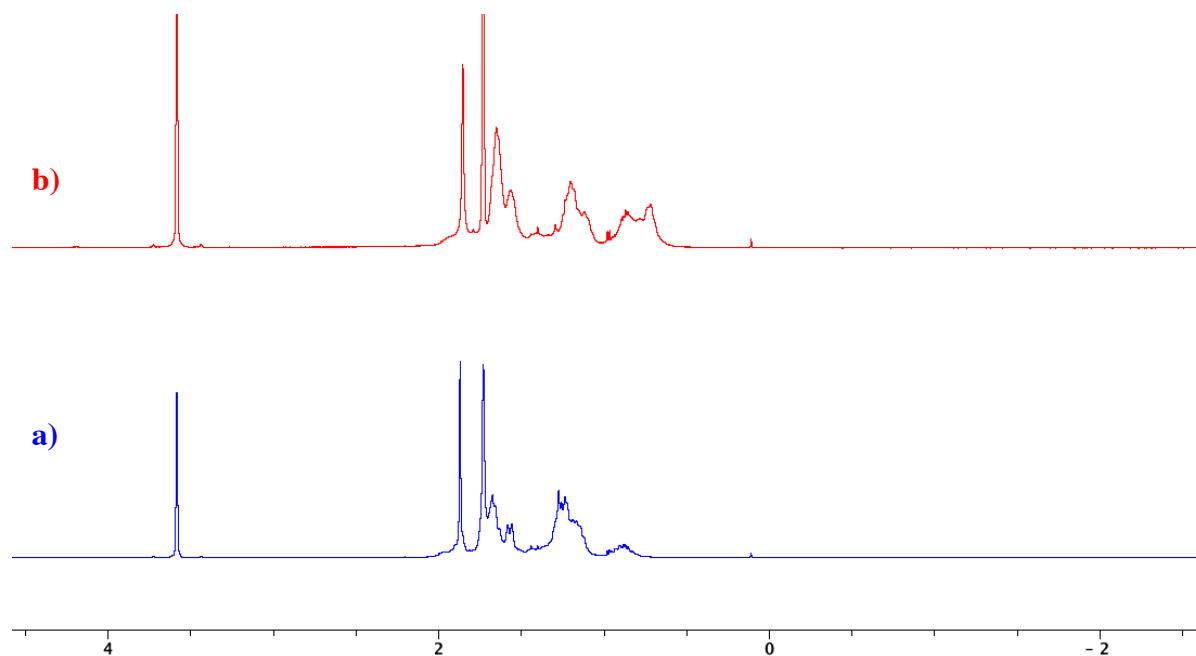

**Figure S50.** Crude  $^1\text{H}$  NMR (expansion) for treatment of **4** with 4 equivalents of **a)** benzoic acid or **b)** 4-pyridylbenzoic acid, THF- $d_8$ , 500 MHz, 298 K.

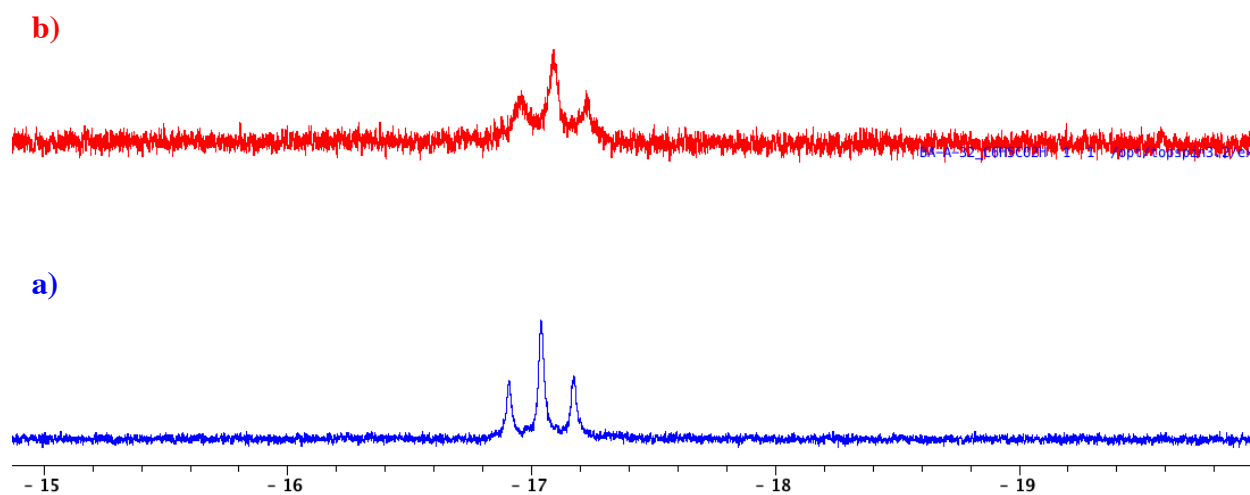

**Figure S51.**  $^1\text{H}$  NMR comparison **a)** treatment of **4** with 4-pyridylbenzoic acid and **b)** a saturated 4-pyridylbenzoic solution, THF- $d_8$ , 500 MHz, 298 K.

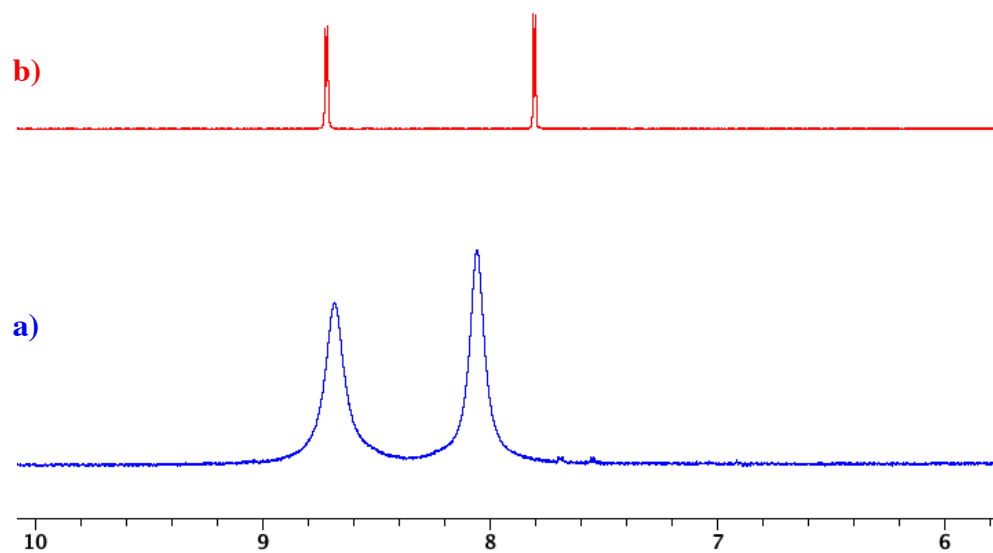

**Figure S52.** Crude  $^{31}\text{P}$  NMR for treatment of **4** with 4 equivalents of **a)** benzoic acid or **b)** 4-pyridylbenzoic acid, THF- $d_8$ , 203 MHz, 298 K.

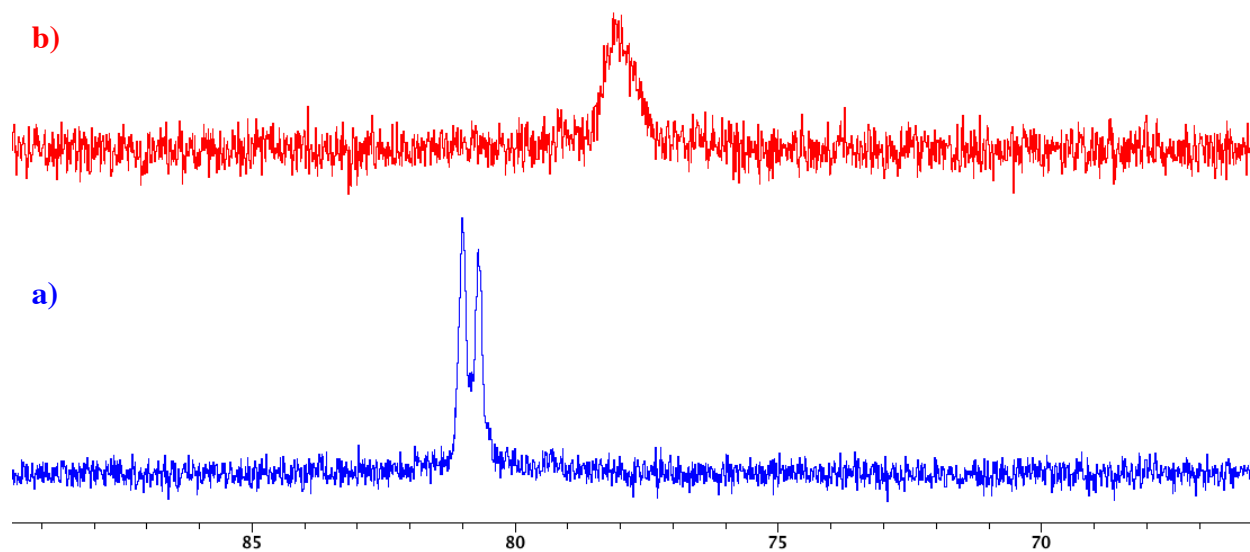

**Figure S53.**  $^{11}\text{B}\{^1\text{H}\}$  NMR, THF- $d_8$ , 160.5 MHz, 298 K of **a)**  $\text{BCy}_2^{\text{n}}\text{Oct}$  + 1 equiv. BzOH (showing no reaction) and **b)**  $\text{BCy}_2^{\text{n}}\text{Oct}$  + 1 equiv. 4-pyridylbenzoic acid (showing adduct formation at  $\delta_{\text{B}} = 6$  ppm). \*\*Signal at  $\delta_{\text{p}} = 50$  ppm due to trace  $\text{Cy}_2\text{B-O-BCy}_2$ .

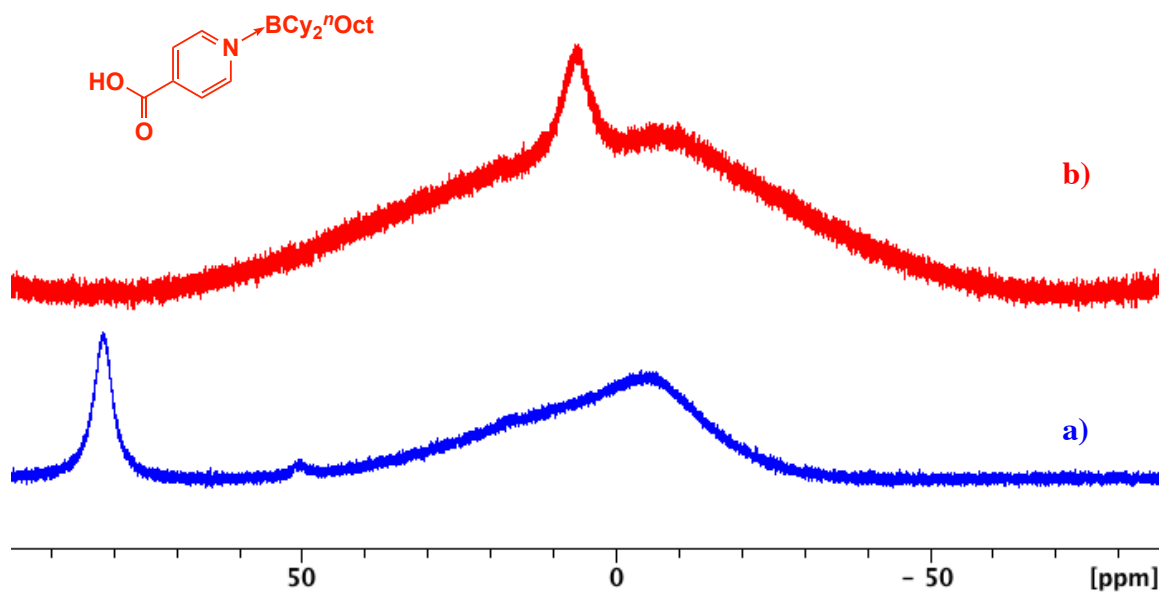

**Figure S54.**  $^{31}\text{P}$  NMR for treatment of 7 with 4-pyridylbenzoic acid, THF- $d_8$ , 203 MHz, 298 K.

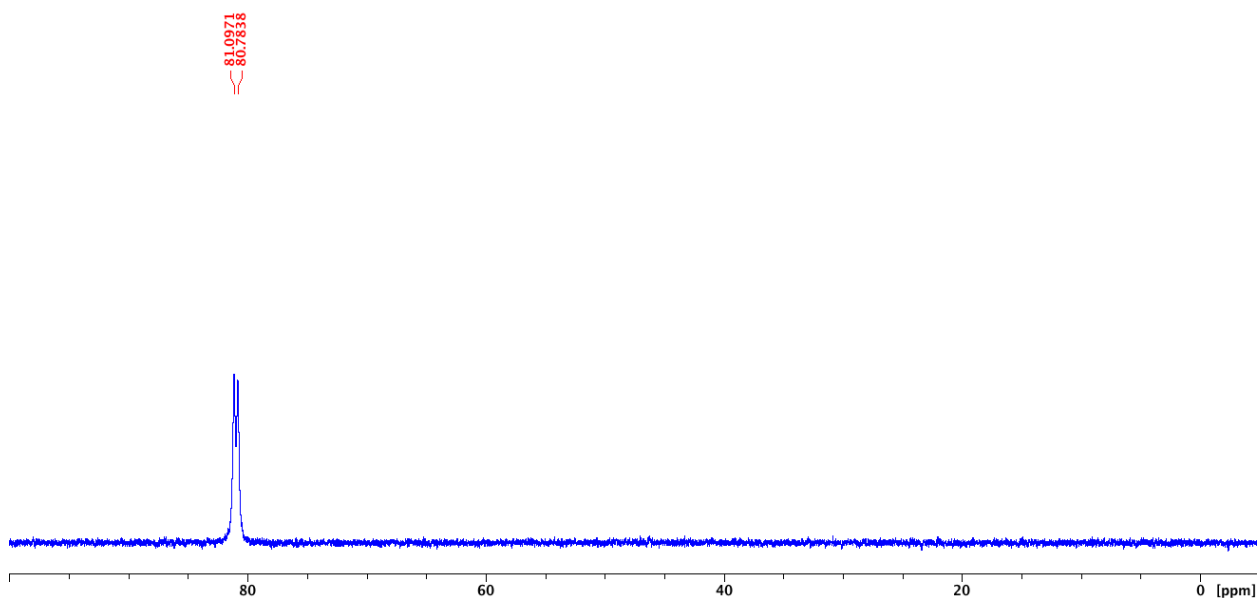

Figure S55. [5]O<sub>2</sub>CPh, <sup>1</sup>H NMR, THF-d<sub>8</sub>, 500 MHz, 298 K.

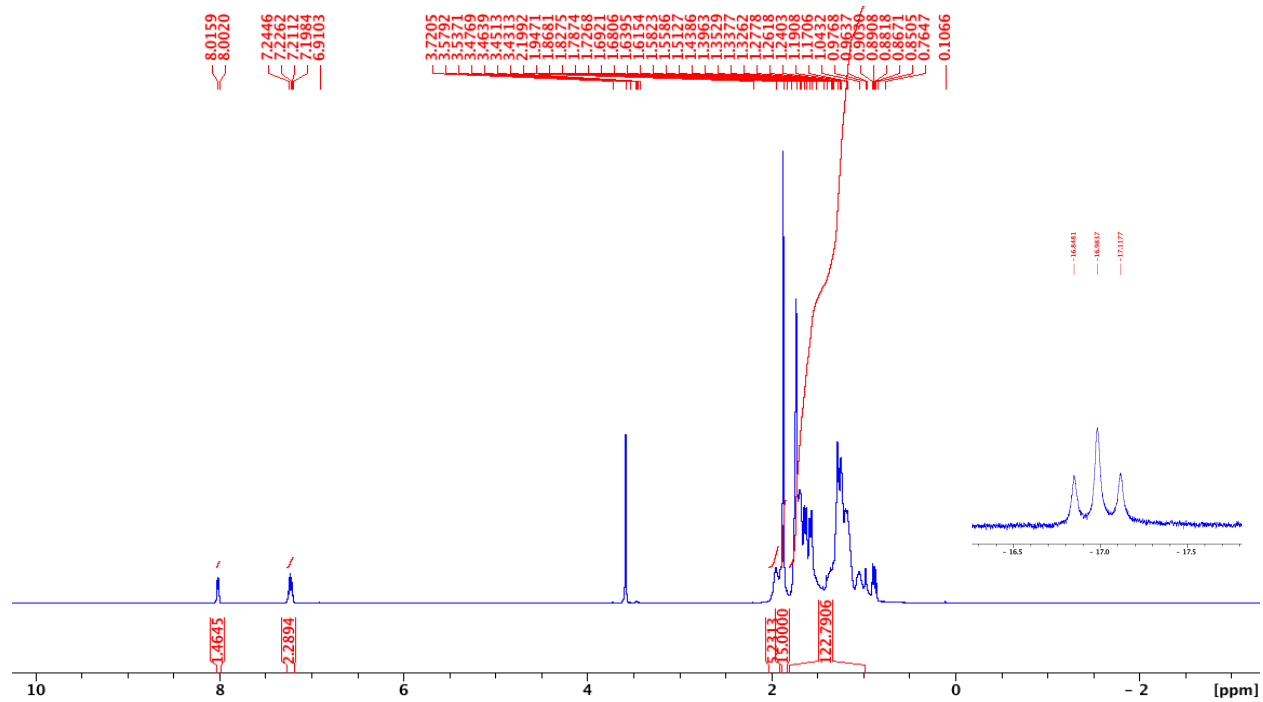

Figure S56. [5]O<sub>2</sub>CPh, <sup>31</sup>P NMR, THF-d<sub>8</sub>, 203 MHz, 298 K.

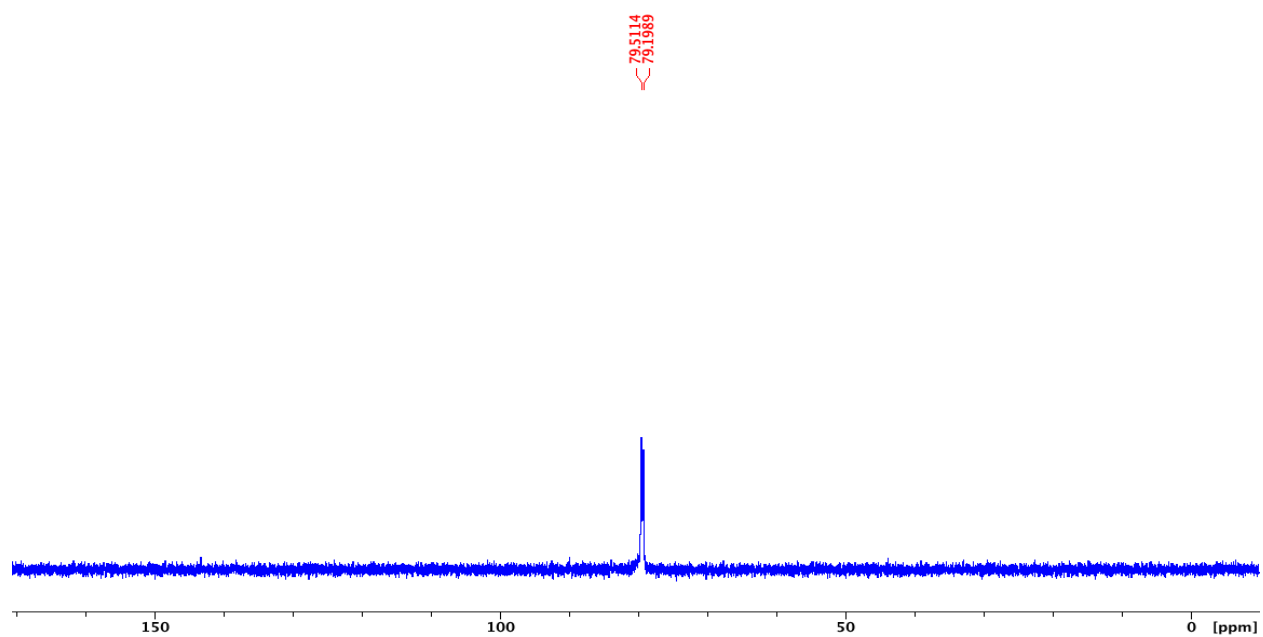

**Figure S57.**  $^1\text{H}$  NMR, 500 MHz, 298 K of **a)** [5]O<sub>2</sub>CPh in C<sub>6</sub>D<sub>6</sub>, **b)** [5]O<sub>2</sub>CPh in THF-d<sub>8</sub>.

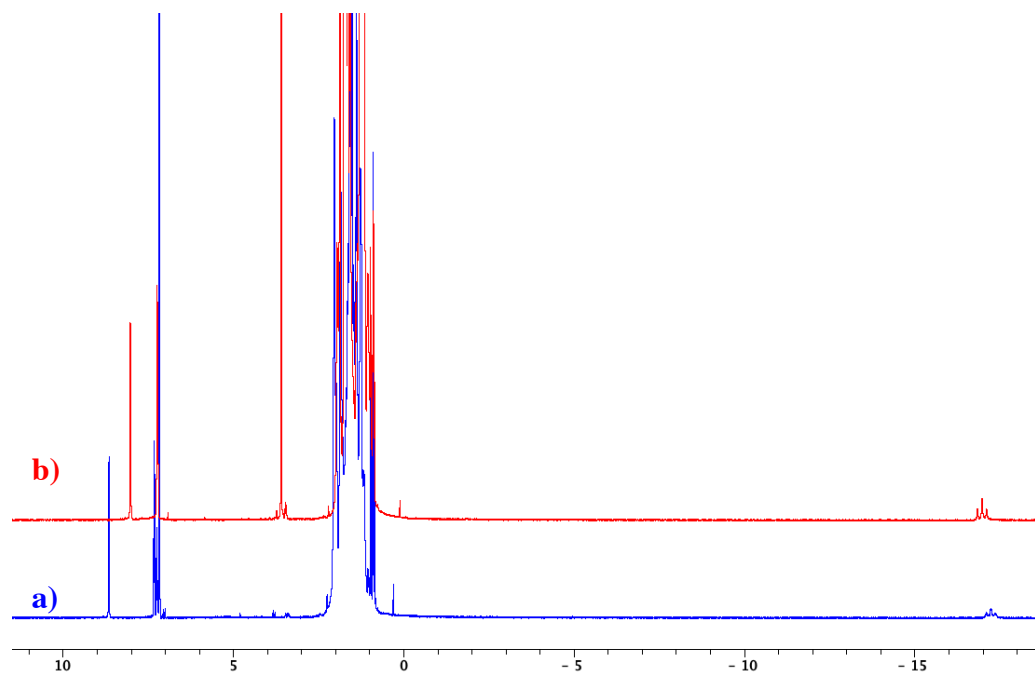

**Figure S58.**  $^1\text{H}$  NMR, 500 MHz, 298 K of **a)** [5]O<sub>2</sub>CPh in C<sub>6</sub>D<sub>6</sub>, **b)** [5]O<sub>2</sub>CPh in THF-d<sub>8</sub> showing aromatic region.

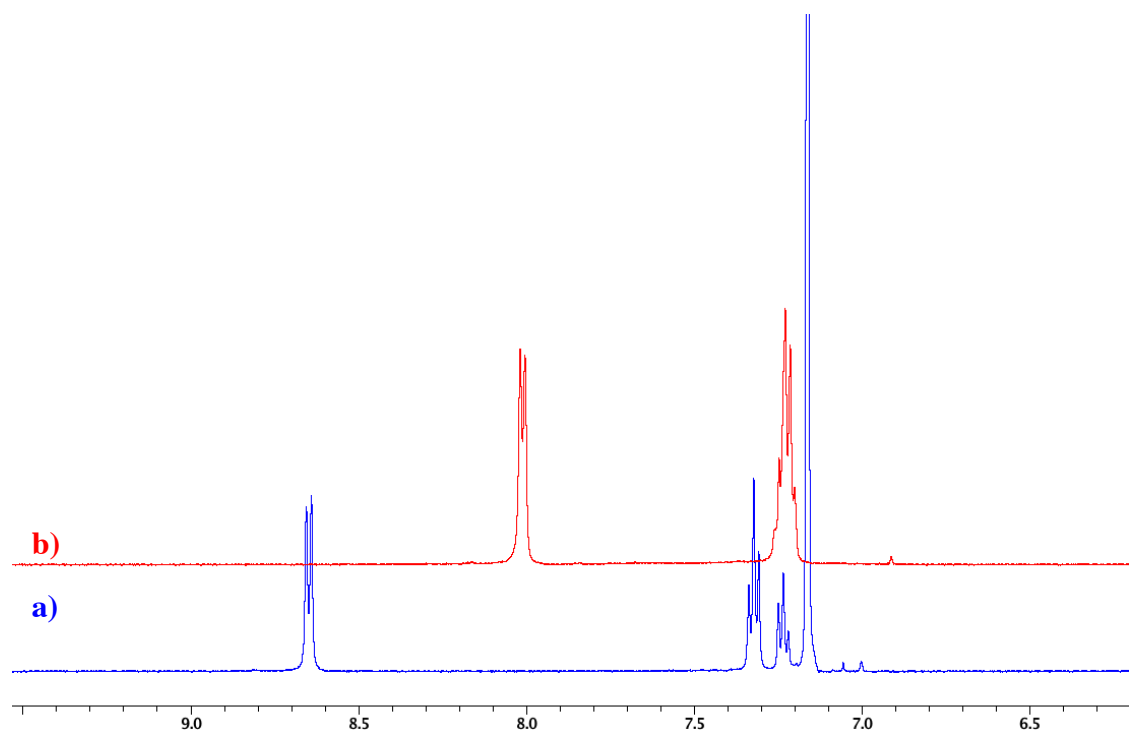

**Figure S59.**  $^1\text{H}$  NMR, 500 MHz, 298 K of **a)**  $[\text{5}]\text{O}_2\text{CPh}$  in  $\text{C}_6\text{D}_6$ , **b)**  $[\text{5}]\text{O}_2\text{CPh}$  in  $\text{THF-d}_8$  and **c)**  $[\text{5}]\text{BPh}_4$  in  $\text{THF-d}_8$ .

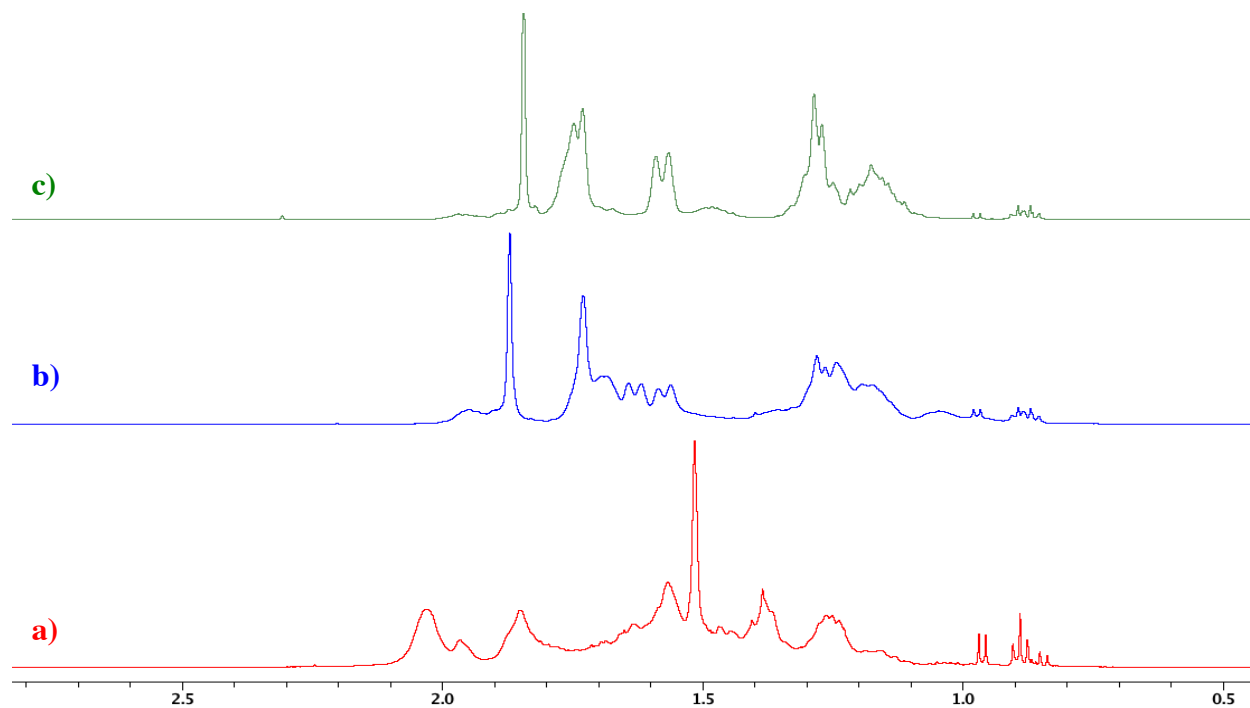

**Figure S60.** Benzoic acid,  $^1\text{H}$  NMR, 500 MHz, 298 K in **a)**  $\text{C}_6\text{D}_6$  and **b)**  $\text{THF-d}_8$ . Note:  $\text{K}[\text{O}_2\text{CPh}]$  and  $\text{Na}[\text{O}_2\text{CPh}]$  are insoluble in  $\text{C}_6\text{D}_6$  and  $\text{THF-d}_8$ .

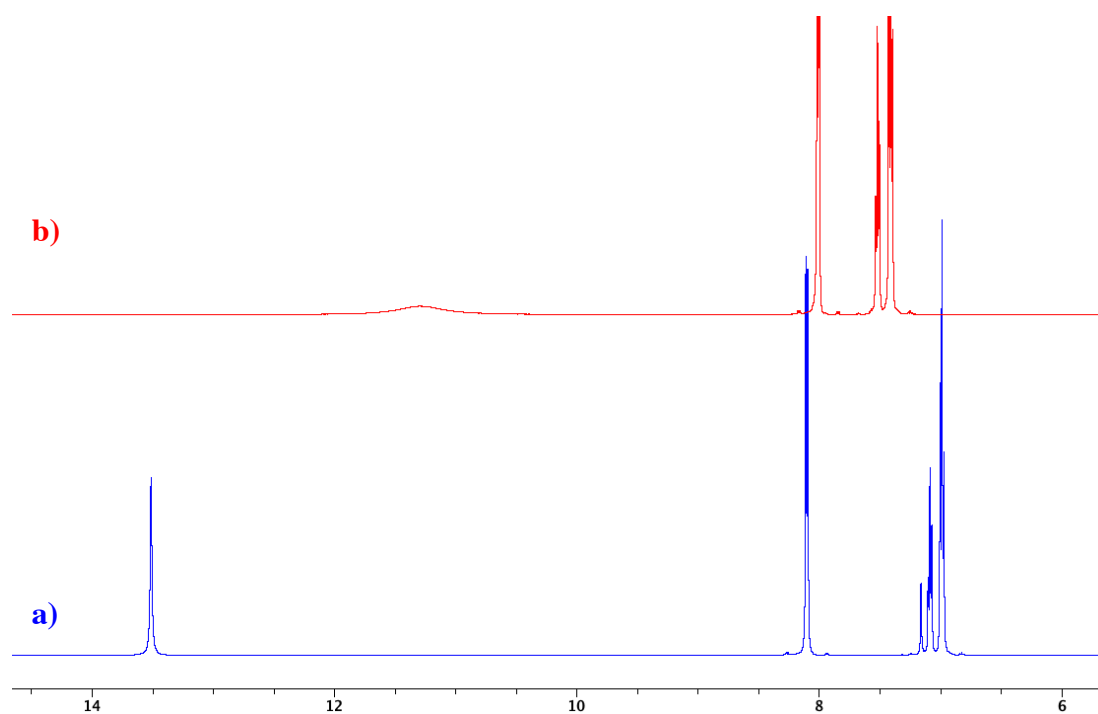



**Figure S61.** [5]O<sub>2</sub>CPh, Variable Temperature <sup>1</sup>H NMR, THF-d<sub>8</sub>, 500 MHz.

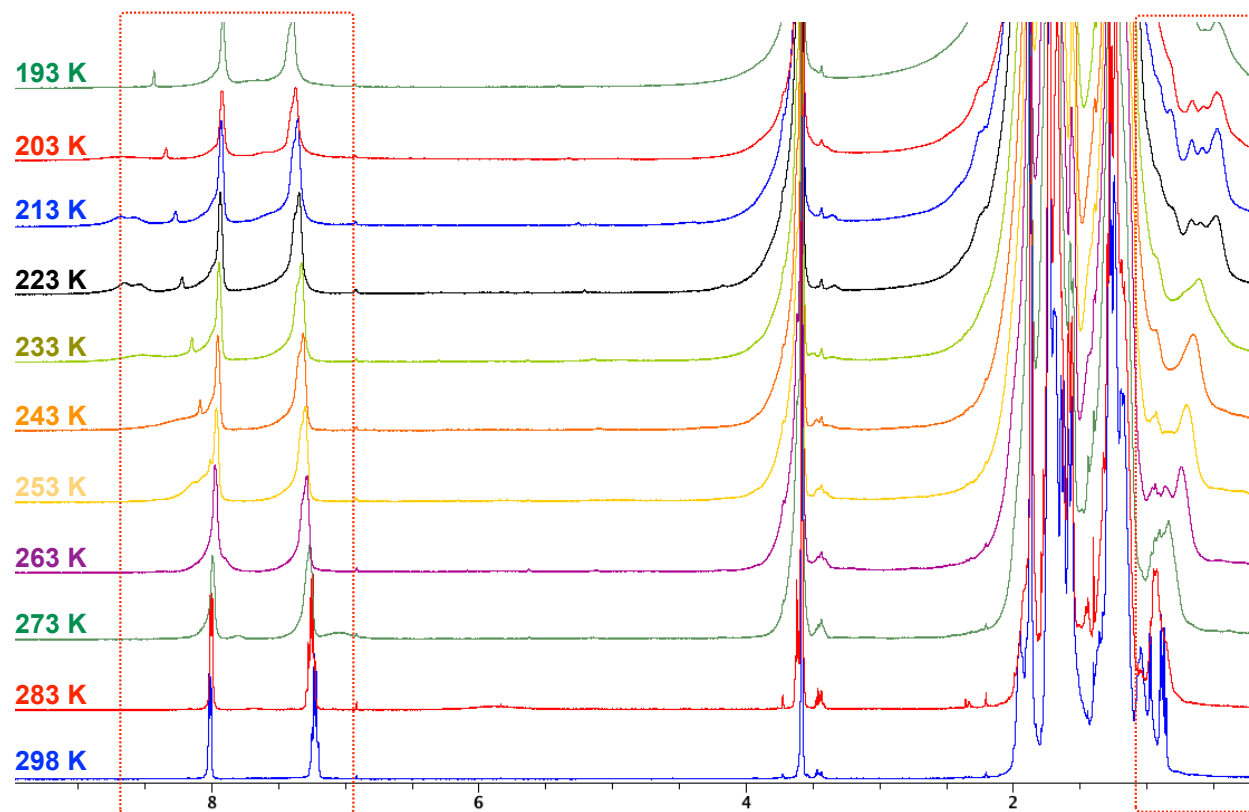

**Figure S62.** [5]O<sub>2</sub>CPh, Variable Temperature <sup>1</sup>H NMR, THF-d<sub>8</sub>, 500 MHz (hydride region).

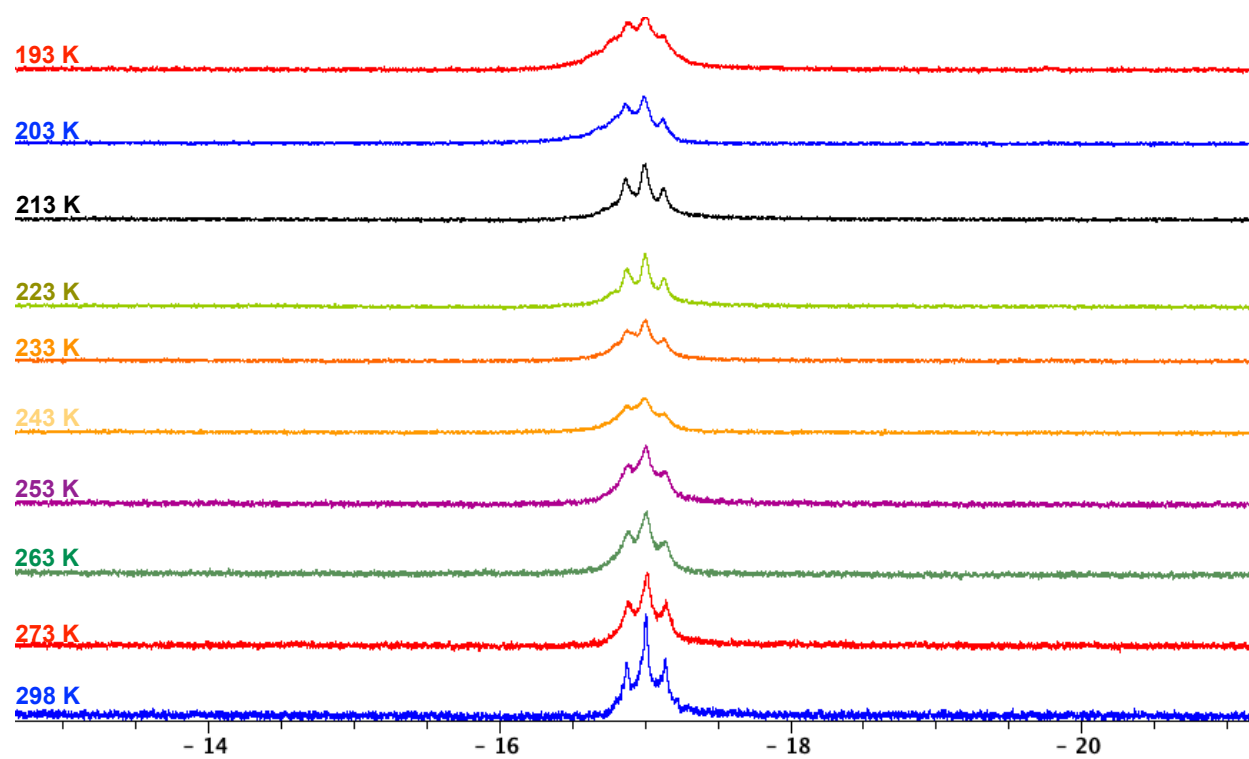

Figure S63. [5]O<sub>2</sub>CPh, Variable Temperature <sup>31</sup>P{<sup>1</sup>H} NMR, THF-d<sub>8</sub>, 203 MHz.

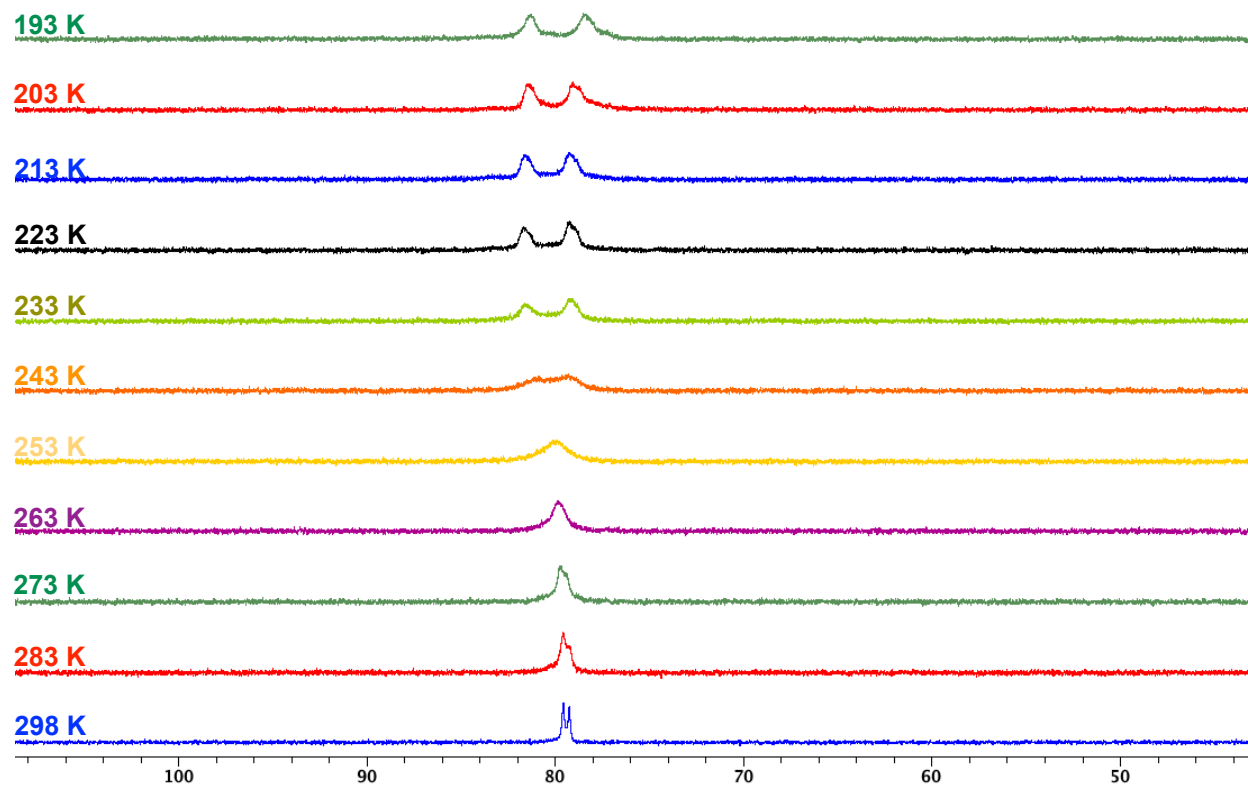

Figure S64. Treatment of **a)** **4** with 4 equivalents of benzoic acid after 4 h showing cyclohexane formation at  $\delta_{\text{H}} = 1.40$  ppm and **b)** **4** with 1 equivalent of benzoic acid, <sup>1</sup>H NMR, THF-d<sub>8</sub>, 500 MHz.

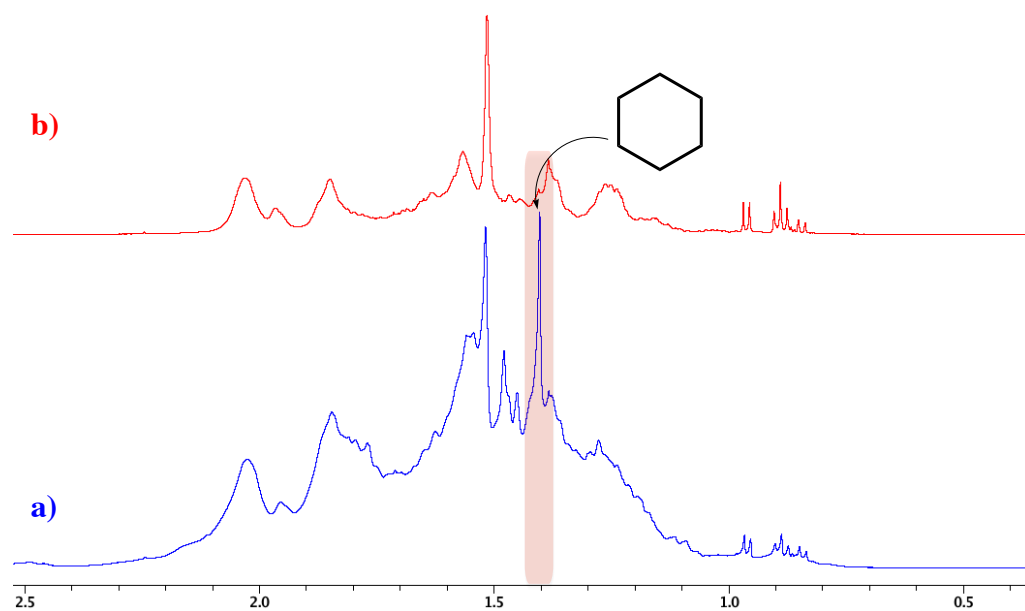

Figure S65. [5]<sup>+</sup>, FT-IR (NaCl plate) spectrum, 298 K, ( $\nu(\text{Co}-\text{H}) = 1937 \text{ cm}^{-1}$ )

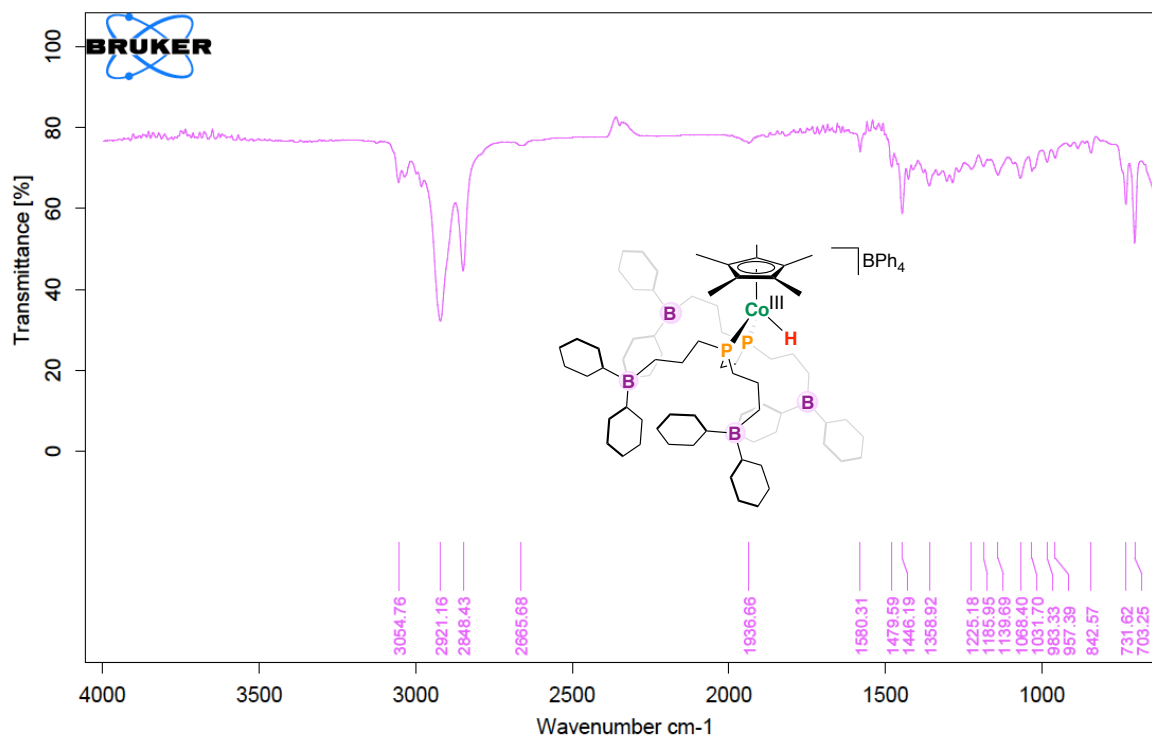

Figure S66. [6]<sup>+</sup>, FT-IR (NaCl plate) spectrum, 298 K, ( $\nu(\text{Co}-\text{H}) = 1937 \text{ cm}^{-1}$ )

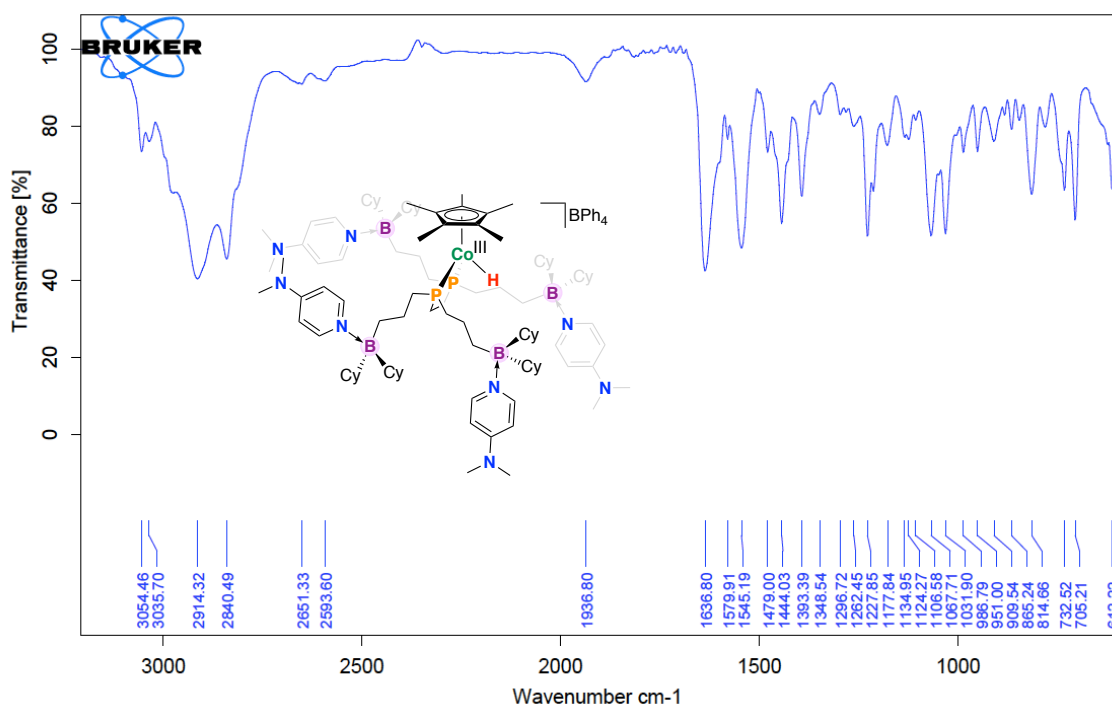

**Figure S67.** [8]<sup>+</sup>, FT-IR ATR spectrum, 298 K, thin film ( $\nu(\text{Co}-\text{H}) = 1939 \text{ cm}^{-1}$ )

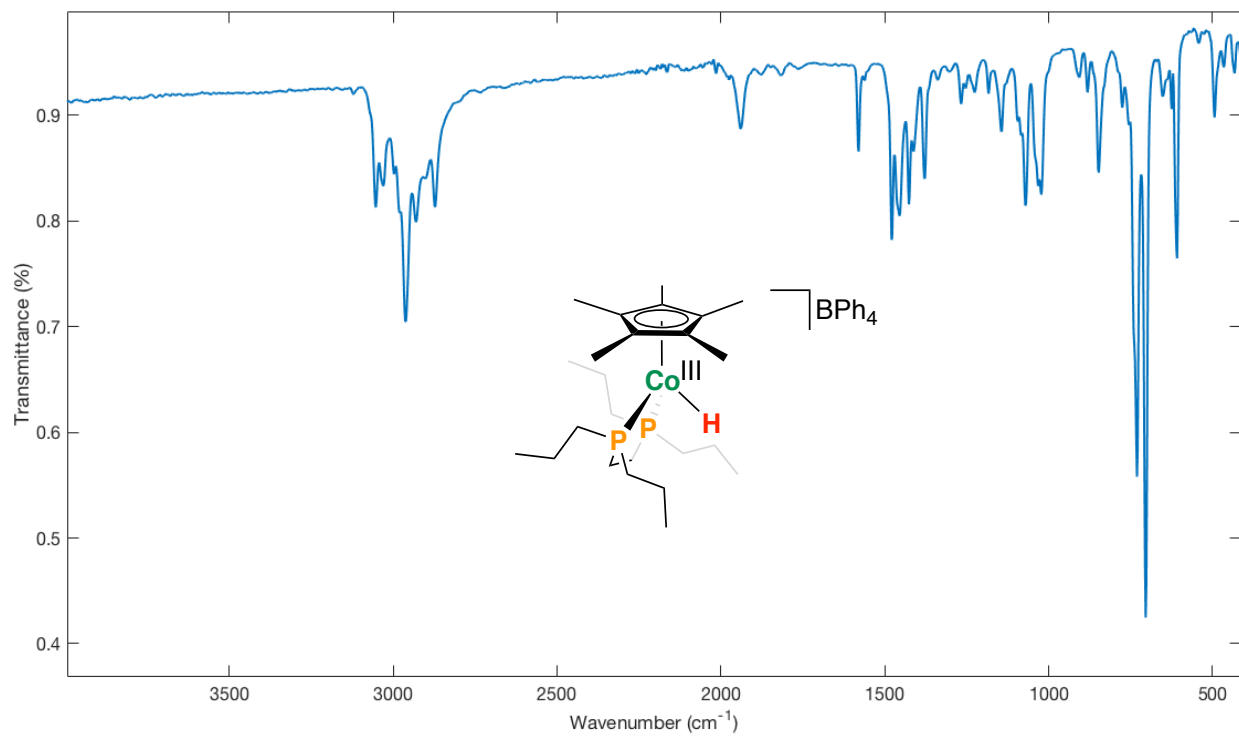

**Table S2.** Relevant Electrochemical Data

| Compound                        | $E_{pc}/V$ | $E_{pa}/V$ | $\Delta E/V^*$ | $E_{1/2}/V$ |
|---------------------------------|------------|------------|----------------|-------------|
| 2 in THF                        | -1.30      | -1.09      | 0.21           | -1.21       |
|                                 | N/A        | -0.09      | N/A            | N/A         |
| 2 + 5 equivs. MeCN              | -1.29      | -1.14      | 0.15           | -1.21       |
|                                 | -0.85      | -0.62      | 0.23           | -0.74       |
| [3] <sup>+</sup> in THF         | -1.40      | -1.23      | 0.17           | -1.32       |
| [3] <sup>+</sup> in MeCN        | -1.41      | N/A        | N/A            | N/A         |
| 4                               | -1.40      | -1.14      | 0.26           | -1.31       |
| 4 + 5 equivs. MeCN              | -1.47      | -1.22      | 0.25           | -1.31       |
|                                 | N/A        | -0.59      | N/A            | N/A         |
| [5] <sup>+</sup>                | -1.41      | N/A        | N/A            | N/A         |
| [8] <sup>+</sup> 5 equivs. MeCN | -1.32      | -1.24      | 0.08           | -1.28       |
|                                 | N/A        | -0.61      | N/A            | N/A         |
| [9] <sup>+</sup> in THF         | -1.39      | -1.23      | 0.16           | -1.31       |
| [9] <sup>+</sup> in MeCN        | -1.43      | -1.35      | 0.08           | -1.39       |
|                                 | -1.13      | -1.03      | 0.1            | -1.08       |

\* $\Delta E$  was 0.17 V for Fc/Fc<sup>+</sup> in THF and 0.085 V in MeCN.

**Figure S68.** Cyclic voltammogram depicting the scan-rate dependence for  $[3]^+$  (2 mM analyte, 0.25 M  $[N^rBu_4]PF_6$ ).

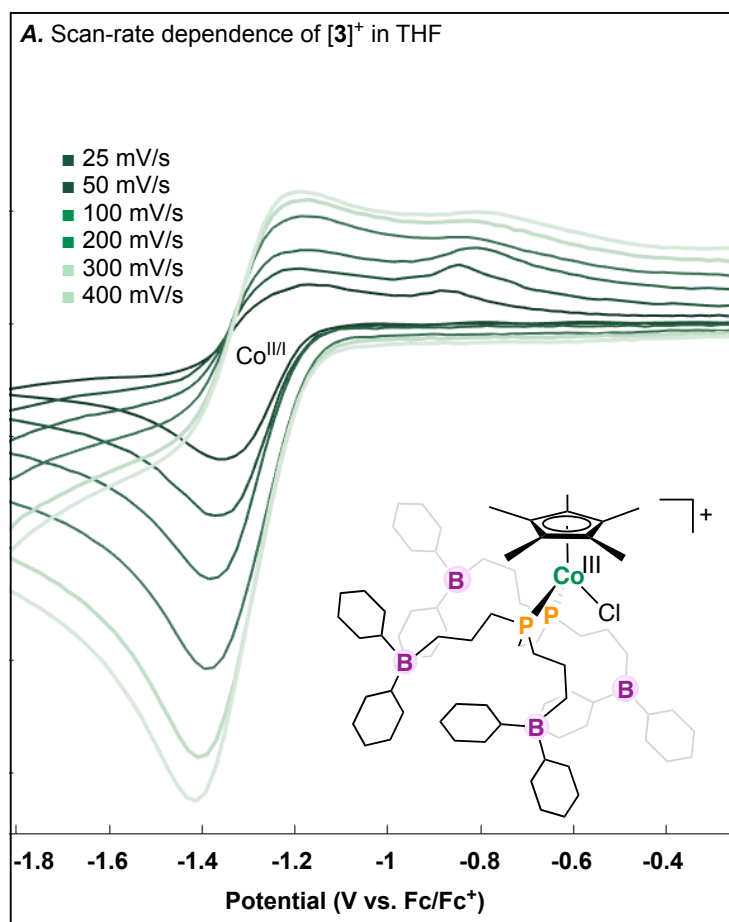

**Figure S69.** Cyclic voltammograms depicting the scan-rate dependence for [9]<sup>+</sup> (2 mM analyte, 0.25 M [N<sup>n</sup>Bu<sub>4</sub>]PF<sub>6</sub>).

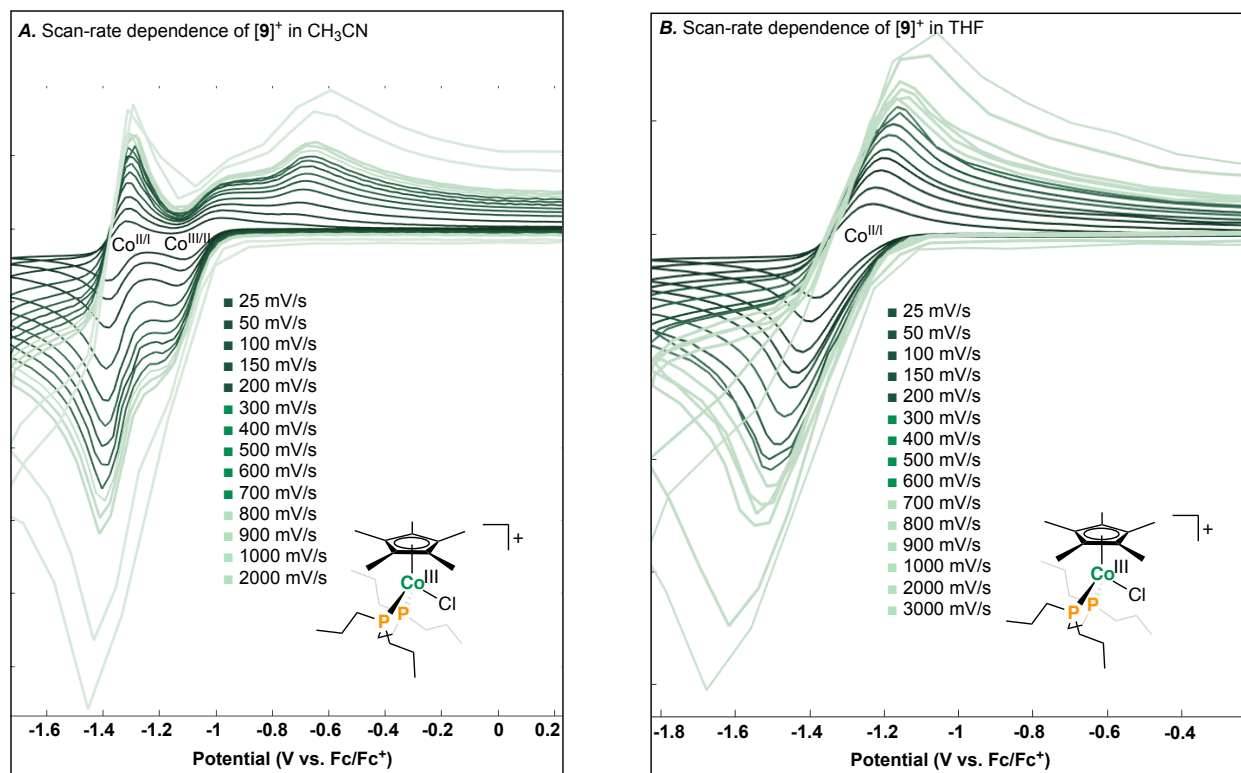

**Figure S70.** Cyclic voltammograms depicting [5]<sup>+</sup> (dotted green line) and [6]<sup>+</sup> (solid orange line) (THF, 2 mM analyte, 0.25 M [N<sup>n</sup>Bu<sub>4</sub>]PF<sub>6</sub>).  $\nu = 200$  mV/s.

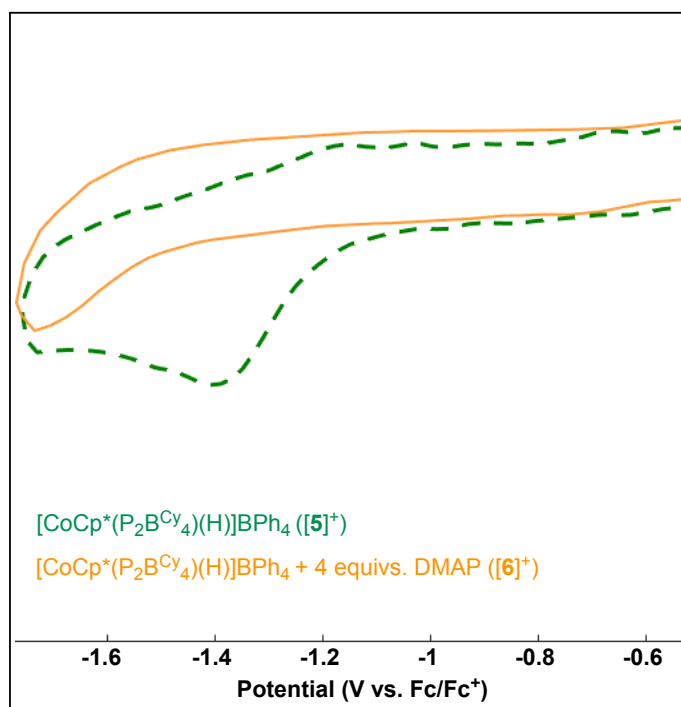

**Figure S71.** Cyclic voltammograms depicting reductions of benzoic acid (green) and 4-pyridylbenzoic acid (orange) (THF, 2 mM analyte, 0.25 M [N<sup>n</sup>Bu<sub>4</sub>]PF<sub>6</sub>).  $\nu = 200$  mV/s.<sup>3</sup>

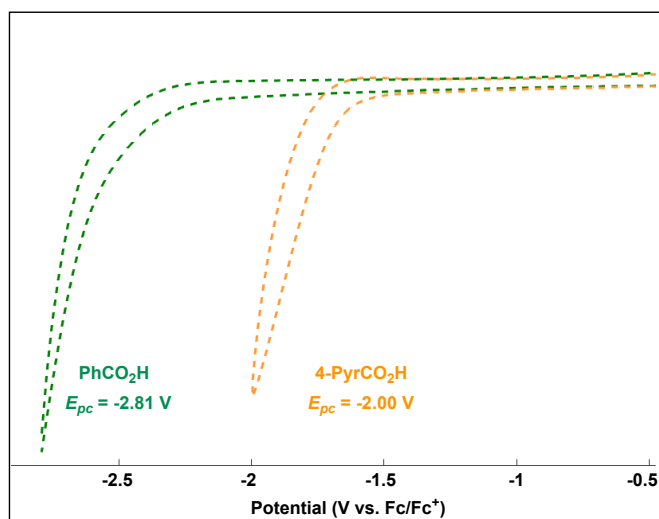

<sup>3</sup> For a summary of organic redox potentials, see: Roth, H. G.; Romero, N. A.; Nicewicz, D. A. *Synlett* **2016**, 27, 714.



### **Crystallographic details:**

Single crystal X-ray diffraction (scXRD) data for [5]<sup>+</sup> was collected at the Canadian Macromolecular Crystallography Facility CMCF-BM beamline at the Canadian Light Source.<sup>4</sup> CMCF-BM is a bending magnet beamline equipped with a Si(111) double crystal monochromator, Pilatus 6M detector, and MD2 microdiffractometer equipped with a Mini Kappa Goniometer. Data for [5]<sup>+</sup> was collected at 0.675 Å at the CMCF-BM at 100 K.

Cell refinement and data reduction were performed using XDS.<sup>5</sup> An empirical absorption correction, based on the multiple measurements of equivalent reflections and merging of data was performed using SADABS.<sup>6</sup> Data conversion from XDS to SADABS file format was performed using XDS2SAD.<sup>7</sup> Space group was confirmed by XPREP.<sup>8</sup>

The initial model and difference Fourier map for [5]<sup>+</sup> was obtained with SHELXL-2018.<sup>9</sup> The crystal structure of [5]<sup>+</sup> was solved by a combination of direct-methods and real-space refinement. The real-space refinement was performed using COOT.<sup>10</sup> Direct methods refinement was performed with SHELXL-2018<sup>8</sup> using conjugate-gradient refinement (CGLS) in the initial stages and then by full-matrix least-squares and difference Fourier techniques at the final stages.

All non-hydrogen atoms were refined with anisotropic displacement parameters. Hydrogen atoms, except for the [Co]-H unit in [5]<sup>+</sup>, were placed at calculated positions and refined using a riding model. The [Co]-H unit was not extracted from Fourier electron density map. The compound crystallizes as multicomponent non-merohedral twin. As a result, the structure contains two additional molecules of the compound in a different orientation with about 25% occupancy. Attempts were made to detwin the data and collect other crystals, but none of these attempts yielded a better result. Only heavy atoms of the secondary domain have been assigned in the structure. The unassigned electronic density of lighter atoms of the secondary twinning domain contributes negatively to the refinement parameters but their assignment is complicated by numerous structural overlaps.

---

<sup>4</sup> P. Grochulski, M. N. Fodje, J. Gorin, S. L. Labiuk, and R. Berg, *J. Synchrotron Rad.* **2011**, *18*, 681.

<sup>5</sup> W. Kabsch, *J. Appl. Cryst.* **1993**, *26*, 795.

<sup>6</sup> L. Krause, R. Herbst-Irmer, G. M. Sheldrick, and D. Stalke, *J. Appl. Cryst.* **2015**, *48*, 3-10.

<sup>7</sup> XDS2SAD, G. M. Sheldrick, 2008, University of Gottingen, Germany.

<sup>8</sup> a) XPREP, **2014**, Bruker AXS Inc., Madison, Wisconsin, USA. b) XPREP Version 2008, G. M. Sheldrick, 2008 Bruker AXS Inc., Madison, Wisconsin, USA.

<sup>9</sup> a) G. M. Sheldrick, SHELXS97, University of Gottingen, Germany 1997; b) G. M. Sheldrick, *Acta Cryst. A* **2008**, *64*, 112; c) G. M. Sheldrick, *Acta Cryst. C* **2015**, *71*, 3.

<sup>10</sup> P. Emsley, B. Lohkamp, W. G. Scott, and K. Cowtan, *Acta Cryst. A* **2010**, *D66*, 486.

The publication materials were prepared using LinXTL<sup>11</sup> and Mercury<sup>12</sup> programs. Routine checkCIF and structure factor analyses were performed using Platon.<sup>13</sup>

CCDC 2068546 contains the supplementary crystallographic data for this paper. These data can be obtained free of charge from The Cambridge Crystallographic Data Centre *via* [www.ccdc.cam.ac.uk/data\\_request/cif](http://www.ccdc.cam.ac.uk/data_request/cif).

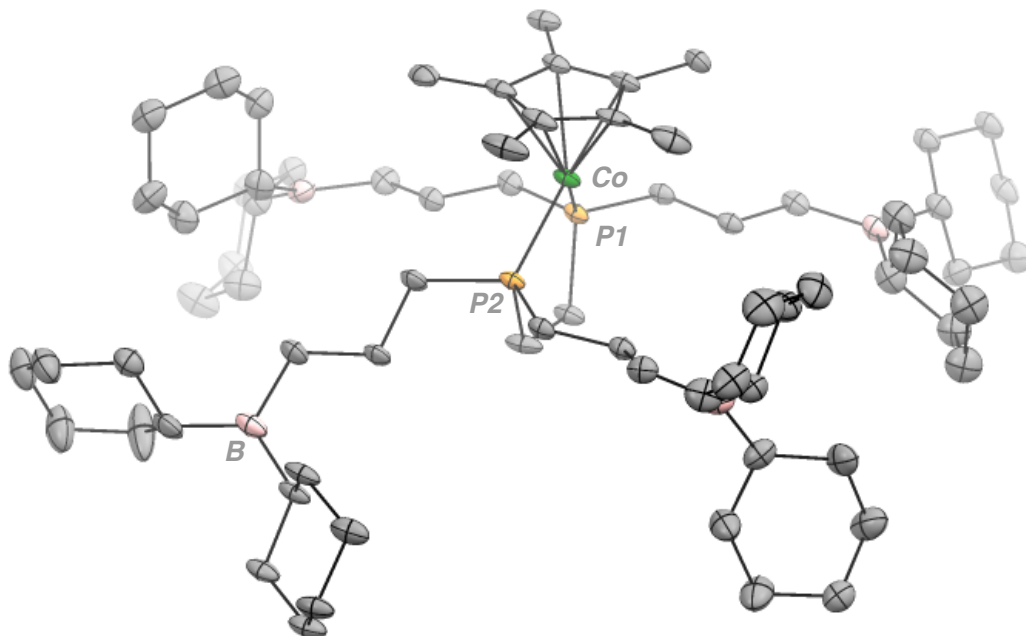

**Figure S72.** Crystal structure of [Cp\*Co(P<sub>2</sub>B<sup>Cy</sup><sub>4</sub>)(H)]BPh<sub>4</sub> ([5]BPh<sub>4</sub>). Hydrogens and BPh<sub>4</sub> counterion omitted for clarity, ellipsoids shown at 20% probability. This structure suffers from a high R1-value and provides a heavy-atom connectivity map only.

<sup>11</sup> LinXTL, D. M. Spasyuk, 2009, University of Montreal, Canada. <http://sourceforge.net/projects/linxtl/>

<sup>12</sup> C. F. Macrae, I. Sovago, S. J. Cottrell, P. T. A. Galek, P. McCabe, E. Pidcock, M. Platings, G. P. Shields, J. S. Stevens, M. Towler and P. A. Wood, *J. Appl. Cryst.* 2020, 53, 226.

<sup>13</sup> A. L. Spek, *Acta Cryst.* 2009, D65, 148.

**Table S3.** Crystallographic data for [5]BPh<sub>4</sub>.

|                                                   |                                                                                     |
|---------------------------------------------------|-------------------------------------------------------------------------------------|
| Compound                                          | [5]BPh <sub>4</sub>                                                                 |
| Empirical formula                                 | C <sub>768</sub> H <sub>1208</sub> B <sub>40</sub> Co <sub>10</sub> P <sub>20</sub> |
| Formula weight                                    | 12082.37                                                                            |
| Temperature/K                                     | 100                                                                                 |
| Crystal system                                    | Monoclinic                                                                          |
| Space group                                       | <i>P2<sub>1</sub>/c</i>                                                             |
| a/Å                                               | 22.927(5)                                                                           |
| b/Å                                               | 25.816(5)                                                                           |
| c/Å                                               | 34.235(7)                                                                           |
| α/°                                               | 90                                                                                  |
| β/°                                               | 96.68(3)                                                                            |
| γ/°                                               | 90                                                                                  |
| V/Å <sup>3</sup>                                  | 20126(7)                                                                            |
| Z                                                 | 1                                                                                   |
| r/ g/cm <sup>-3</sup>                             | 0.997                                                                               |
| m/ mm <sup>-1</sup>                               | 0.251                                                                               |
| F(000)                                            | 6586.0                                                                              |
| Crystal size/ mm <sup>3</sup>                     | 0.1 × 0.05 × 0.05                                                                   |
| Radiation                                         | synchrotron (λ = 0.675)                                                             |
| 2θ range for datacollection/°                     | 1.698 to 47.38                                                                      |
|                                                   | -27 ≤ h ≤ 27, -30 ≤ k ≤ 30, -38 ≤                                                   |
| Index ranges                                      | l ≤ 40                                                                              |
| Reflections Collected                             | 109622                                                                              |
| Independent Reflections                           | 35184 [R <sub>int</sub> = 0.1134, R <sub>sigma</sub> = 0.1085]                      |
| Data/restraints/parameters                        | 35184/6265/1867                                                                     |
| Goodness-of-fit on F <sup>2</sup>                 | 1.541                                                                               |
| R [I>=2θ (I)] (R <sub>1</sub> , wR <sub>2</sub> ) | R <sub>1</sub> = 0.1811, wR <sub>2</sub> = 0.4454                                   |
| R (all data) (R <sub>1</sub> , wR <sub>2</sub> )  | R <sub>1</sub> = 0.2507, wR <sub>2</sub> = 0.4964                                   |
| Largest diff. peak/hole / (e Å <sup>-3</sup> )    | 3.82/-0.95                                                                          |

$$R_1 = \frac{\sum ||F_o| - |F_c||}{\sum |F_o|}; wR_2 = [\frac{\sum (w(F_o^2 - F_c^2)^2)}{\sum w(F_o^2)^2}]^{1/2}$$

## **Computational Chemistry:**

All calculations were performed using version 4.2.1 of the ORCA computational package<sup>14</sup> and were run on the Cedar cluster at Simon Fraser University, maintained by Compute Canada.

Geometry optimizations (for Co containing complexes) and the potential energy surface (PES) scan were performed using the TPSS functional with D3(BJ)<sup>15</sup> dispersion correction. The def2-TZVP basis set was used on Co and the def2-SVP<sup>16</sup> basis set on all other atoms. Frequency calculations were performed on all optimized geometries to confirm that each was a true minimum indicated by the absence of imaginary frequencies. The geometries from the PES scan were used as printed. The RI approximation was used to enhance computational efficiency, with an auxiliary basis set *def2/J*<sup>17</sup>. *TIGHTOPT* methods were employed. Convergence criteria were met using *Grid4* and *FinalGrid6* integral grid sizes. An .xyz file containing pertinent geometries can be found in the supporting information.

For the carboxylic acid / carboxylate systems discussed in **Scheme 6** of the paper, geometry optimizations were performed at the BP86-D3(BJ)/def2-TZVP level and accurate electronic energies were calculated using the “gold standard” of quantum chemistry (CCSD(T)) at the DLPNO-CCSD(T)/def2-TZVP level of theory. *NormalPNO TIGHTSCF* were used. The RIJCOSX approximation was used to enhance computational efficiency during the DLPNO-CCSD(T)/def2-TZVP jobs. As such, a *def2/J*<sup>17</sup> auxiliary basis set was used. As well, a *def2-TZVP/C* auxiliary basis set was used.  $\Delta G^{\circ}_{298K}$  energies were obtained using the electronic energy from the DLPNO-CCSD(T)/def2-TZVP calculations and thermally corrected with the BP86-D3(BJ)/def2-TZVP calculation. An SMD<sup>18</sup> solvent model of THF was used at the BP86-D3(BJ)/def2-TZVP level of theory to account for solvation effects.

---

<sup>14</sup> F. Neese, "Software update: the ORCA program system, version 4.0" *WIREs Comput. Mol. Sci.* 2017, e1327. doi: 10.1002/wcms.1327

<sup>15</sup> a) S. Grimme, S. Ehrlich, L. Goerigk, *J. Comput. Chem.* 2011, **32**, 1456; b) S. Grimme, J. Antony, S. Ehrlich, H. Krieg, *J. Chem. Phys.* 2010, **132**, 154104;

<sup>16</sup> F. Weigend, R. Ahlrichs, *Phys. Chem. Chem. Phys.* 2005, **7**, 3297.

<sup>17</sup> F. Weigend, *Phys. Chem. Chem. Phys.* 2006, **8**, 1057.

<sup>18</sup> A.V. Marenich, C.J. Cramer, D.G. Truhlar, *J. Phys. Chem. B.* 2009, **113**, 6378.

<sup>11</sup>B NMR chemical shifts were calculated with reference to BF<sub>3</sub>-OEt<sub>2</sub> at the BP86-D3(BJ)/def2-TZVP level of theory. A universal solvation model (SMD) of tetrahydrofuran (THF) was used for all <sup>11</sup>B NMR chemical shifts. *Grid6 NoFinalGrid* integral grid sizes were employed. An auxiliary basis set of *def2/JK*<sup>19</sup> was employed as well. ORCA v. 4.2.1 employs the GIAO method for calculating NMR chemical shifts.

$$\delta = \delta_{\text{ref}} - \delta_{\text{targetmol}}$$

The starting geometry used for the PES scan was obtained from the structure of [5]<sup>+</sup> with all Cy groups truncated to Me except on the boron of interest (Cy groups were maintained on this boron). The same method was used to construct a truncated model of [6]<sup>+</sup>.

**Table S4.**  $\nu(\text{Co-H})$  calculated at the TPSS-D3(BJ)/def2-SVP (def2-TZVP on Co) level of theory.

| Compound                   | $\nu(\text{Co-H}) / \text{cm}^{-1}$ |
|----------------------------|-------------------------------------|
| [5] <sup>+</sup>           | 2061                                |
| Truncated [5] <sup>+</sup> | 2042                                |
| Truncated [6] <sup>+</sup> | 2034                                |

**Table S5.** Calculated <sup>11</sup>B NMR chemical shifts referenced to BF<sub>3</sub>-OEt<sub>2</sub>, calculated at the BP86-D3(BJ)/def2-TZVP level of theory with a universal solvation model of THF.

| Compound         | Individual <sup>11</sup> B chemical shifts $\delta / \text{ppm}$ | Average $\delta / \text{ppm}$ |
|------------------|------------------------------------------------------------------|-------------------------------|
| [5] <sup>+</sup> | B <sub>A</sub>                                                   | 80                            |
|                  | B <sub>B</sub>                                                   | 78                            |
|                  | B <sub>C</sub>                                                   | 79                            |
|                  | B <sub>D</sub>                                                   | 79                            |
|                  |                                                                  | 79                            |

<sup>19</sup> F. Weigend, *J. Comp. Chem.* 2008, **29**, 167.

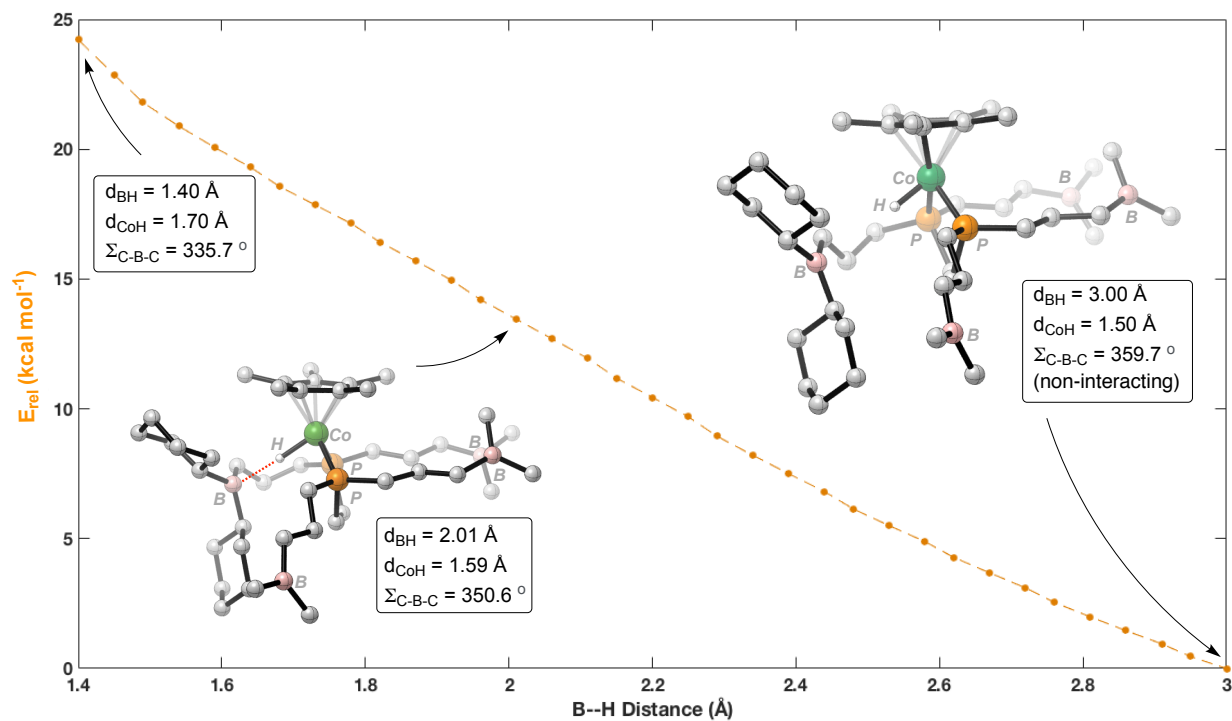

**Figure 73.** Potential energy surface (PES) obtained by varying the H--B distance from 1.40 to 3.00 Å. Truncated model using three non-interacting  $-\text{BMe}_2$  groups and one interacting  $-\text{BCy}_2$  group. Structures depicted using CYL view. Structure at 2.01 Å chosen arbitrarily.
